# Supplementary material for: Squaramides for colorimetric and fluorescent anion sensing
Source: Royal Society of Chemistry journal article supplement (doi:10.1039/d3ob00069a), 2023-01-01
Supplement: d3ob00069a1.pdf [file d3ob00069a1.pdf]

## **Squaramides for Colorimetric and Fluorescent Anion Sensing**

Jakob D. E. Lane<sup>a</sup> and Katrina A. Jolliffe<sup>a,b,c\*</sup>

<sup>a</sup> School of Chemistry, The University of Sydney, NSW, 2006, Australia

<sup>b</sup> Australian Research Council Centre of Excellence for Innovations in Peptide and Protein Science, The University of Sydney, 2006, NSW, Australia

<sup>c</sup> The University of Sydney Nano Institute (Sydney Nano), The University of Sydney, NSW 2006, Australia

[kate.jolliffe@sydney.edu.au](mailto:kate.jolliffe@sydney.edu.au)

## Table of Contents

|                                                                               |          |
|-------------------------------------------------------------------------------|----------|
| Experimental                                                                  | page S3  |
| $^1\text{H}$ and $^{13}\text{C}$ NMR spectra                                  | page S9  |
| HRMS data                                                                     | page S28 |
| $\text{p}K_{\text{a}}$ titration data                                         | page S38 |
| Correlation of $\text{p}K_{\text{a}}$ with $^1\text{H}$ NMR NH chemical shift | page S40 |
| UV-vis titration data                                                         | page S42 |
| Excitation/Emission spectra                                                   | page S43 |
| Fluorescence dilution data                                                    | page S44 |
| Fluorescence titration data                                                   | page S45 |
| References                                                                    | page S47 |

## Experimental

### General methods and materials

All chemicals and solvents were of reagent grade ( $\geq 95\%$ ) and used as received unless otherwise noted. Reactions were magnetically stirred and monitored by thin-layer chromatography (TLC) carried out on Merck alumina silica gel plates (60F-254) using UV light as visualising agent, and potassium permanganate and heat as developing agents. Melting points were manually observed using a Stanford Research Systems Optimelt melting point apparatus.  $^1\text{H}$  NMR and  $^{13}\text{C}$  NMR spectra were recorded using at 300 K using either a 600 Bruker Avance (equipped with a high resolution cryogenic triple nucleus probehead), 500 Bruker Avance DPX or a Bruker Avance 300 spectrometer and are reported as parts per million (ppm), referenced to residual undeuterated solvent. The data are reported as chemical shift ( $\delta$ ), multiplicity (br = broad, s = singlet, d = doublet, t = triplet, m = multiplet), coupling constant ( $J$  Hz) and relative integral. Low resolution mass spectra were recorded on a Bruker amaZon SL mass spectrometer (ESI) operating in positive or negative mode as indicated. High resolution ESI spectra were recorded on a Bruker BioApex Fourier Transform Ion Cyclotron Resonance mass spectrometer (FTICR) with an Analytica ESI source, operating at 4.7 T or a Bruker Daltonics Apex Ultra FTICR with an Apollo Dual source, operating at 7 T and are reported as  $m/z$  (relative intensity). Infrared absorption spectra were recorded on a Bruker Alpha-E FT-IR spectrometer using attenuated total reflection (ATR) of either a solid or a thin film. Notable vibrational wavenumbers are given in  $\text{cm}^{-1}$ .

$\text{p}K_{\text{a}}$  values were determined using the absorbance wavelength of maximum difference between the protonated and deprotonated species. UV-Vis  $\text{p}K_{\text{a}}$  titrations were performed by firstly acidifying a solution of receptor (20 – 25  $\mu\text{M}$ ) in DMSO (10% water) containing TBAPF<sub>6</sub> (0.1 M) with aqueous perchloric acid (1M) to  $\text{pH} < 4$ . The pH probe was calibrated in a solution of in standard calibrant solution (solutions of  $\text{pH}$  4, 7 and 10). The solution was slowly basified with additions of small aliquots aqueous NaOH (0.1 M), and UV-Vis spectra recorded after each addition to obtain the change in absorbance profile with increasing  $\text{pH}$ . The absorbance values of the wavelength of maximal difference were plotted against the  $\text{pH}$  values, and the data points fitted to a Boltzmann S curve to obtain the  $\text{p}K_{\text{a}}$  value at the inflection point of the curve. The  $\text{p}K_{\text{a}}$  values obtained represent the average of two independent  $\text{pH}$  titrations.

UV-Vis anion binding titrations were performed by additions of aliquots of the putative anionic guest as the TBA salt (10 – 30 mM) made up in a solution of the receptor (20 – 25  $\mu$ M) in DMSO (1% water). UV-Vis spectra were recorded on a Cary 400 UV-Vis spectrophotometer at 25 °C in a 1 cm quartz cuvette after background subtraction of the cuvette and solvent. The solution was stirred after each addition. Binding affinities were obtained from a global fit of the absorbance data between 330 – 430 nm, fitting to a 1:1 binding model in Bindfit. The obtained  $K_a$  values represent the average of two independent titrations, and experimental error is estimated to be less than 15% for each  $K_a$  value obtained.

Fluorescence anion binding titrations were performed by additions of aliquots of the putative anionic guest as the TBA salt (10 – 30 mM) made up in a solution of the receptor (20 – 25  $\mu$ M) in DMSO (1% water). Fluorescence spectra were recorded on a Horiba Duetta fluorescence and absorbance spectrophotometer with temperature controlled enabled (25 °C) in a 1 cm quartz cuvette. The solution was stirred after each addition. Binding affinities were obtained from a global fit of the absorbance data between 330 – 430 nm, fitting to a 1:1 binding model in Bindfit. The obtained  $K_a$  values represent the average of two independent titrations, and experimental error is estimated to be less than 15% for each  $K_a$  value obtained.

### **3-[(9H-Fluoren-2-yl)amino]-4-(butylamino)cyclobut-3-ene-1,2-dione (1)**

Compound **9** (20 mg, 0.07 mmol), butylamine (7 mg, 0.1 mmol) zinc trifluoromethanesulfonate (4 mg, 0.01 mmol) were stirred in methanol (10 mL) and the solution heated to reflux for 24 hours. The solution was allowed to cool to room temperature and the yellow precipitate was collected by vacuum filtration, then washed with cold methanol to afford **1** as a yellow solid (18 mg, 83%). Mp: 319 °C (decomposition);  $^1\text{H}$  NMR (400 MHz, DMSO- $d_6$ ):  $\delta$  9.64 (s, 1H), 7.84–7.81 (m, 2H), 7.69 (s 1H), 7.59 (s, 1H), 7.59–7.55 (d,  $J$  = 10.1 Hz, 1H), 7.42–7.40 (dd,  $J$  = 10.1 Hz, 1H), 7.38–7.35 (t,  $J$  = 5.2 Hz, 1H), 7.28–7.25 (td,  $J$  = 5.2 Hz, 1H), 3.92 (s, 2H), 3.66–3.62 (q,  $J$  = 6.8 Hz, 2H), 1.62–1.56 (m, 2H), 1.43–1.36 (m, 2H), 0.96–0.93 (t, 8.0 Hz, 3H);  $^{13}\text{C}$  NMR (100 MHz, DMSO- $d_6$ ):  $\delta$  184.5, 180.9, 169.8, 163.9, 145.0, 143.1, 141.3, 138.6, 136.4, 127.2, 126.5, 125.4, 121.1, 120.0, 117.6, 115.5, 43.9, 37.0, 33.1, 19.5, 13.9; IR (solid)  $\nu_{\text{max}}$ : 3178, 3116, 3040, 2956, 2932, 2871, 1792, 1656, 1601, 1560, 1431, 1353, 1130 1095, 951, 871, 781, 764, 729, 729  $\text{cm}^{-1}$ ; HRMS (ESI)  $m/z$ : calc'd for  $\text{C}_{21}\text{H}_{21}\text{N}_2\text{O}_2$   $[\text{M}+\text{H}]^+$  333.1598, found 333.1597.

### 3,4-Bis[(9H-fluoren-2-yl)amino]cyclobut-3-ene-1,2-dione (2)

A mixture of 3,4-diethoxy-3-cyclobutene-1,2-dione (45 mg, 0.26 mmol) and zinc trifluoromethanesulfonate (19 mg, 0.05 mmol) was stirred in methanol (20 mL). 2-aminofluorene (100 mg, 0.55 mmol) was added and the mixture was heated to reflux. After 48 hours, the precipitate was collected *via* hot filtration and the solid was washed with hot methanol to give 3,4-bis((9H-fluoren-2-yl)amino)cyclobut-3-ene-1,2-dione as a yellow solid (42 mg, 36%). Mp: 325 °C (decomposition); <sup>1</sup>H NMR (500 MHz, DMSO-*d*<sub>6</sub>): δ 10.03 (s, 2H), 7.29–7.27 (d, *J* = 8.0 Hz, 2H), 7.84–7.83 (d, 8.0 Hz, 2H), 7.77 (s, 2H), 7.58–7.56 (d, *J* = 10 Hz, 2H), 7.51–7.49 (d, *J* = 10 Hz, 2H), 7.39–7.36 (t, *J* = 7 Hz), 7.30–7.27 (t, *J* = 7 Hz, 2H), 3.95 (s, 4H); <sup>13</sup>C NMR (125 MHz, DMSO-*d*<sub>6</sub>): 182.3, 166.1, 145.0, 143.2, 141.2, 138.1, 137.1, 127.3, 126.7, 125.5, 121.1, 120.0, 118.1, 116.0, 37.1; IR (solid)  $\nu_{\text{max}}$ : 3150, 3039, 2932, 1788, 1668, 1600, 1550, 1448, 1401, 1309, 820, 764, 729, 561 cm<sup>-1</sup>; HRMS (ESI) *m/z*: calc'd for C<sub>30</sub>H<sub>21</sub>N<sub>2</sub>O<sub>2</sub> [M+H]<sup>+</sup> 441.1598; found 441.1597. The spectral data was in good agreement with those previously reported.<sup>1</sup>

### 3-(Butylamino)-4-(pyren-1-ylamino)cyclobut-3-ene-1,2-dione (3)

A mixture of **10** (30 mg, 0.09 mmol), butylamine (10 mg, 0.13 mmol) and zinc trifluoromethanesulfonate (3 mg, 0.01 mmol) were stirred in methanol (10 mL) and the solution was heated to reflux for 24 hours. A red precipitate was formed which was collected by vacuum filtration, and washed with cold methanol to yield **3** as a red solid (14 mg, 43%). Mp: 315 °C (decomposition); <sup>1</sup>H NMR (400 MHz, DMSO-*d*<sub>6</sub>): 11.26 (s, 1H), 9.62 (s, 1H), 8.45–8.43 (d, *J* = 8 Hz, 1H), 8.29–8.27 (m, 3H), 8.22–8.20 (m, 1H), 8.17–8.11 (m, 2H), 8.10–8.06 (m, 2H), 3.69–3.65 (t, *J* = 8 Hz, 2H), 1.63–1.56 (m, 2H), 1.39–1.31 (m, 2H), 0.94–0.90 (t, *J* = 8 Hz, 3H); <sup>13</sup>C NMR (100 MHz, DMSO-*d*<sub>6</sub>): δ 182.3, 173.9, 131.6, 131.4, 130.9, 128.5, 127.8, 127.7, 127.1, 127.0, 125.8, 125.6, 125.4, 124.7, 124.3, 122.6, 122.3, 122.2, 44.0, 32.5, 19.5, 13.9; IR (solid)  $\nu_{\text{max}}$ : 3152, 3042, 2925, 1796, 1639, 1559, 1534, 1489, 1343, 1310, 1259, 1242, 1183, 1093, 962, 939, 834, 817, 680, 636; HRMS (ESI) *m/z*: calc'd for C<sub>24</sub>H<sub>21</sub>N<sub>2</sub>O<sub>2</sub> [M+H]<sup>+</sup> 369.1598; found 369.1596.

### 3,4-Bis(pyren-1-ylamino)cyclobut-3-ene-1,2-dione (4)

A mixture of **10** (20 mg, 0.12 mmol) and zinc trifluoromethanesulfonate (8 mg, 0.02 mmol) was stirred in methanol (25 mL). 1-amimopyrene (50 mg, 0.25 mmol) was added and the mixture was heated to reflux. After 48 hours, the precipitate was collected *via* hot filtration and

the solid was washed with hot methanol to give **4** as an orange solid (11 mg, 20%). Mp: 351 °C (decomposition); <sup>1</sup>H NMR (300 MHz, DMSO-*d*<sub>6</sub>): δ 12.0 (s, br, 2H), 8.49 – 8.08 (m, 18H); IR (solid)  $\nu_{\text{max}}$ : 3153, 3040, 2931, 1797, 1592, 1557, 1531, 1505, 1403, 1323, 1259, 1188, 941, 706, 677 cm<sup>-1</sup>; HRMS (ESI) *m/z*: calc'd for C<sub>36</sub>H<sub>21</sub>N<sub>2</sub>O<sub>2</sub> [M+H]<sup>+</sup> 513.1598; found 513.1598. The spectral data are in agreement with those previously reported.<sup>2</sup>

### **3-(Butylamino)-4-[(naphthalen-2-ylmethyl)amino]cyclobut-3-ene-1,2-dione (5)**

A mixture of 3,4-diethoxy-3-cyclobutene-1,2-dione (50 mg, 0.29 mmol) and naphthalen-2-ylmethanamine (46 mg, 0.29 mmol) was stirred in ethanol (10 mL) at 25 °C. After 1 hour, *n*-butylamine (21 mg, 0.29 mmol) was added and the mixture stirred for a further 2 hours at 25 °C. A colourless precipitate was collected by vacuum filtration and washed with ethanol to give **5** as a colourless solid (63 mg, 70%). Mp: 199–201 °C; <sup>1</sup>H NMR (500 MHz, DMSO-*d*<sub>6</sub>): 8.14-8.12 (d, *J* = 9 Hz, 1H), 8.00-7.99 (m, 1H), 7.92 (m, 1H), 7.73 (s, 1H), 7.67 (m, 4H), 7.32 (s, 1H), 5.23 (d, *J* = 10 Hz, 2H), 3.50 (m, 2H), 1.48 (m, 2H), 1.33-1.25 (m, 2H), 0.87 (t, *J* = 7 Hz, 3 H); <sup>13</sup>C NMR (125 MHz, DMSO-*d*<sub>6</sub>): δ 183.0, 182.8, 168.4, 167.7, 134.7, 133.9, 131.1, 129.2, 128.7, 128.7, 127.0, 126.5, 126.1, 123.7, 45.1, 43.4, 33.2, 19.5, 13.9; IR (solid)  $\nu_{\text{max}}$ : 3155, 3051, 2951, 2927, 2869, 1800, 1633, 1557, 1451, 1430, 1213, 1185, 791, 704 cm<sup>-1</sup>; HRMS (ESI) *m/z*: calc'd for C<sub>19</sub>H<sub>20</sub>N<sub>2</sub>O<sub>2</sub>Na [M+Na] 331.1417, found 331.1417.

### **3,4-Bis[(naphthalen-2-ylmethyl)amino]cyclobut-3-ene-1,2-dione (6)**

A mixture of 3,4-diethoxy-3-cyclobutene-1,2-dione (50 mg, 0.29 mmol) and naphthalen-2-ylmethanamine (115 mg, 0.73 mmol) was stirred in ethanol (10 mL) at room temperature for 12 hours. The precipitate formed was collected by vacuum filtration and washed with cold ethanol to yield **6** as a colourless solid (96 mg, 83%). Mp: 232–234 °C; <sup>1</sup>H NMR (500 MHz, DMSO-*d*<sub>6</sub>): 8.10 (d, *J* = 8 Hz, 2H), 7.98 (d, *J* = 8 Hz, 2H), 7.90 (m, 2H), 7.6 (s, 2H), 7.64 (m, 8H), 5.22 (d, *J* = 3 Hz, 4H); <sup>13</sup>C NMR (125 MHz, DMSO-*d*<sub>6</sub>): δ 183.1, 168.0, 134.6, 133.9, 131.1, 129.2, 128.7, 128.7, 127.1, 126.5, 126.1, 123.7, 45.2; IR (solid)  $\nu_{\text{max}}$ : 3149, 3048, 2930, 1795, 1645, 1598, 1561, 1456, 1258, 943, 775 cm<sup>-1</sup>; HRMS (ESI) *m/z*: calc'd for C<sub>26</sub>H<sub>20</sub>N<sub>2</sub>O<sub>2</sub>Na [M+Na]<sup>+</sup> 415.1417, found 415.1413.

### **3-(Butylamino)-4-[(pyren-1-ylmethyl)amino]cyclobut-3-ene-1,2-dione (7)**

A mixture of 3,4-diethoxy-3-cyclobutene-1,2-dione (50 mg, 0.29 mmol) and pyren-1-ylmethanamine (67 mg, 0.29 mmol) was stirred in ethanol (10 mL) at 25 °C for 2 hours. Butylamine (21 mg, 0.29 mmol) was subsequently added and the mixture stirred for another 2

hours. A white precipitate formed which was collected by vacuum filtration and washed with cold ethanol to yield white precipitate which was collected by vacuum filtration and washed with water to give **7** as a colourless solid (45 mg, 40%). Mp: 248 °C (decomposition); <sup>1</sup>H NMR (500 MHz, DMSO-*d*<sub>6</sub>): δ 8.47-8.45 (d, *J* = 10 Hz, 1H), 8.36-8.31 (m, 4H), 8.20-8.20 (d, 1 Hz, 2H), 8.13-8.10 (m, 2H), 7.90 (s, 1H), 7.34 (s, 1H), 5.52 (m, 2H), 3.51-3.50 (m, 2H), 1.49 (m, 2H), 1.28 (m, 2H), 0.86-0.83 (t, 8 Hz, 3H); <sup>13</sup>C NMR (125 MHz, DMSO-*d*<sub>6</sub>): δ 182.9, 183.0, 168.5, 167.7, 132.7, 131.3, 131.0, 128.6, 127.9, 127.8, 127.3, 126.9, 126.0, 125.9, 125.5, 124.6, 124.4, 123.3, 79.6, 45.3, 43.4, 33.2, 19.4, 13.9; IR (solid)  $\nu_{\text{max}}$ : 3163, 3042, 2955, 2930, 2872, 1797, 1638, 1543, 1343, 1311, 1257, 1244, 1146, 1092, 756, 682 cm<sup>-1</sup>; HRMS (ESI) *m/z*: calc'd for C<sub>25</sub>H<sub>22</sub>N<sub>2</sub>O<sub>2</sub>Na [M+Na]<sup>+</sup> 405.1574, found 405.1571.

### **3,4-Bis-[(pyren-1-ylmethyl)amino]cyclobut-3-ene-1,2-dione (8)**

A mixture of 3,4-diethoxy-3-cyclobutene-1,2-dione (30 mg, 0.18 mmol), pyren-1-ylmethanamine hydrochloride (100 mg, 0.44 mmol) and Et<sub>3</sub>N (70 mg, 0.70 mmol) was stirred in ethanol (20 mL) at 25 °C. After 4 hours, water (50 mL) was added to the reaction mixture to produce a white precipitate which was collected by vacuum filtration and washed with water to give **8** as a colourless solid (55 mg, 58%). Mp: >250 °C <sup>1</sup>H NMR (500 MHz, DMSO-*d*<sub>6</sub>): δ 8.42-8.40 (d, *J* = 10 Hz, 2H), 8.32-8.26 (m, 8H), 8.19-8.14 (m, 4H), 8.10-8.07 (m, 4H), 7.90 (s, 2H), 5.51-5.49 (d, *J* = 10 Hz, 4H); <sup>13</sup>C NMR (125 MHz, DMSO-*d*<sub>6</sub>): δ 183.2, 167.9, 132.4, 131.2, 131.0, 130.7, 128.5, 127.9, 127.8, 127.3, 126.9, 126.0, 125.8, 125.5, 124.6, 124.3, 123.2, 45.4 IR (solid)  $\nu_{\text{max}}$ : 3160, 3046, 2931, 1797, 1640, 1561, 1459, 1310, 826, 681 cm<sup>-1</sup>; HRMS (ESI) *m/z*: calc'd for C<sub>38</sub>H<sub>24</sub>N<sub>2</sub>O<sub>2</sub>Na [M+Na]<sup>+</sup> 563.1730, found 563.1723.

### **3-[(9H-Fluoren-2-yl)amino]-4-ethoxycyclobut-3-ene-1,2-dione (9)**

A mixture of 3,4-diethoxy-3-cyclobutene-1,2-dione (50 mg, 0.30 mmol) and zinc trifluoromethanesulfonate (12 mg, 0.03 mmol) was stirred in methanol (10 mL). 2-Aminofluorene (52 mg, 0.28 mmol) was added and the mixture was stirred at room temperature. After 48 hours, the precipitate was collected by filtration and the solid was washed with cold methanol to give **9** as a yellow solid (55 mg, 65%). Mp: 212–215 °C; <sup>1</sup>H NMR (400 MHz, DMSO-*d*<sub>6</sub>): δ 10.80 (s, 1H), 7.86-7.83 (t, *J* = 5 Hz, 2H), 7.60 (s, 1H), 7.58–7.56 (d, *J* = 10 Hz, 1H) 7.41–7.36 (m, 2H), 7.31–7.27 (td, *J* = 5, 2, 1H), 4.82–4.78 (q, *J* = 5 Hz, 2 H), 3.92 (s, 2H), 1.46–1.43 (t, *J* = 5 Hz, 3H); <sup>13</sup>C NMR (125 MHz, DMSO-*d*<sub>6</sub>): δ 188.5, 184.1, 178.7, 170.0, 144.5, 143.3, 141.1, 137.8, 137.4, 127.3, 126.9, 125.5, 120.8, 120.1, 119.2, 117.1, 70.0, 37.0,

16.1; IR (solid)  $\nu_{\max}$ : 3238, 3196, 3112, 3022, 2979, 2934, 1792, 1704, 1603, 1574, 1514, 1469, 1436, 1377, 1347, 1311, 1212, 1180, 1071. 810, 765, 613  $\text{cm}^{-1}$ ; HRMS (ESI)  $m/z$ : calc'd for  $\text{C}_{19}\text{H}_{16}\text{O}_3\text{N}$   $[\text{M}+\text{H}]^+$  306.1122; found 306.1125.

### **3-Ethoxy-4-(pyren-1-ylamino)cyclobut-3-ene-1,2-dione (10)**

A mixture of 3,4-diethoxy-3-cyclobutene-1,2-dione (43 mg, 0.25 mmol) and zinc trifluoromethanesulfonate (8 mg, 0.02 mmol) was stirred in methanol (10 mL). 1-amimopyrene (50 mg, 0.23 mmol) was added and the mixture was stirred at room temperature. After 72 hours, the precipitate was collected by filtration and the solid was washed with cold methanol to give **10** as an orange solid (41 mg, 51%). Mp: 163 °C (decomposition);  $^1\text{H}$  NMR (600 MHz,  $\text{DMSO-}d_6$ ): 11.32 (s, 1H), 8.33–8.32 (d,  $J = 5.2$  Hz, 1H), 8.30–8.28 (m, 2H), 8.24–8.33 (d,  $J = 5.2$  Hz, 1H), 8.16–8.8.16 (d,  $J = 2.0$  Hz, 2H), 8.09–8.07 (t,  $J = 5.1$  Hz, 1H), 7.91–7.90 (d,  $J = 5.1$  Hz, 1H), 4.69–4.66 (q,  $J = 3.9$  Hz, 2H), 1.32–1.30 (t,  $J = 3.9$  Hz, 3H);  $^{13}\text{C}$  NMR (100 MHz,  $\text{DMSO-}d_6$ )  $\delta$  192.1, 179.9, 131.8, 131.3, 131.1, 130.9, 130.1, 129.1, 128.0, 127.6, 127.5, 127.1, 125.6, 125.3, 124.7, 124.2, 124.1, 123.1, 122.8, 122.6, 69.7, 16.1; IR (solid)  $\nu_{\max}$  3182, 3021, 2933, 1805, 1703, 1693, 1599, 1579, 1528, 1459, 1406, 1387, 1155, 1010, 970, 870, 819, 762, 709, 684  $\text{cm}^{-1}$ ; HRMS (ESI)  $m/z$ : calc'd for  $\text{C}_{22}\text{H}_{15}\text{NO}_3\text{Na}$   $[\text{M}+\text{H}]^+$  364.0944, found 364.0942.



Current Data Parameters  
 NAME 210519\_jlan8805\_50050911124  
 EXPNO 1  
 PROCNO 1

F2 - Acquisition Parameters  
 Date\_ 20210519  
 Time\_ 11.34 h  
 INSTRUM spect  
 PROBHD z119470\_0008 ( zq  
 PULPROG zq  
 TD 65538  
 SOLVENT DMSO  
 NS 8  
 DS 0  
 SWH 10000.000 Hz  
 FIDRES 0.305176 Hz  
 AQ 3.2767999 sec  
 RG 45.2  
 DW 50.000 usec  
 DE 6.50 usec  
 TE 320.0 K  
 D1 2.00000000 sec  
 TDO 1  
 SFO1 500.1330008 MHz  
 NUC1 1H  
 P1 14.00 usec  
 PLW1 15.48799992 W

F2 - Processing parameters  
 SI 32768  
 SF 500.1300000 MHz  
 WEW EM  
 SSB 0  
 LB 0.30 Hz  
 GB 0  
 PC 1.00

9.643  
 7.844  
 7.828  
 7.823  
 7.808  
 7.691  
 7.588  
 7.562  
 7.547  
 7.418  
 7.414  
 7.402  
 7.398  
 7.376  
 7.361  
 7.346  
 7.284  
 7.282  
 7.269  
 7.267  
 7.254  
 7.253

3.921  
 3.655  
 3.642  
 3.629  
 3.616

1.622  
 1.608  
 1.594  
 1.579  
 1.565  
 1.414  
 1.399  
 1.384  
 1.369  
 0.956  
 0.941  
 0.927

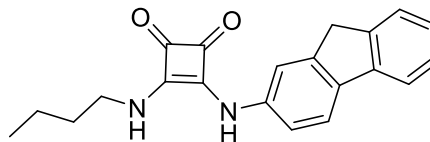

1

<sup>1</sup>H NMR (500 MHz, DMSO-d<sub>6</sub>)

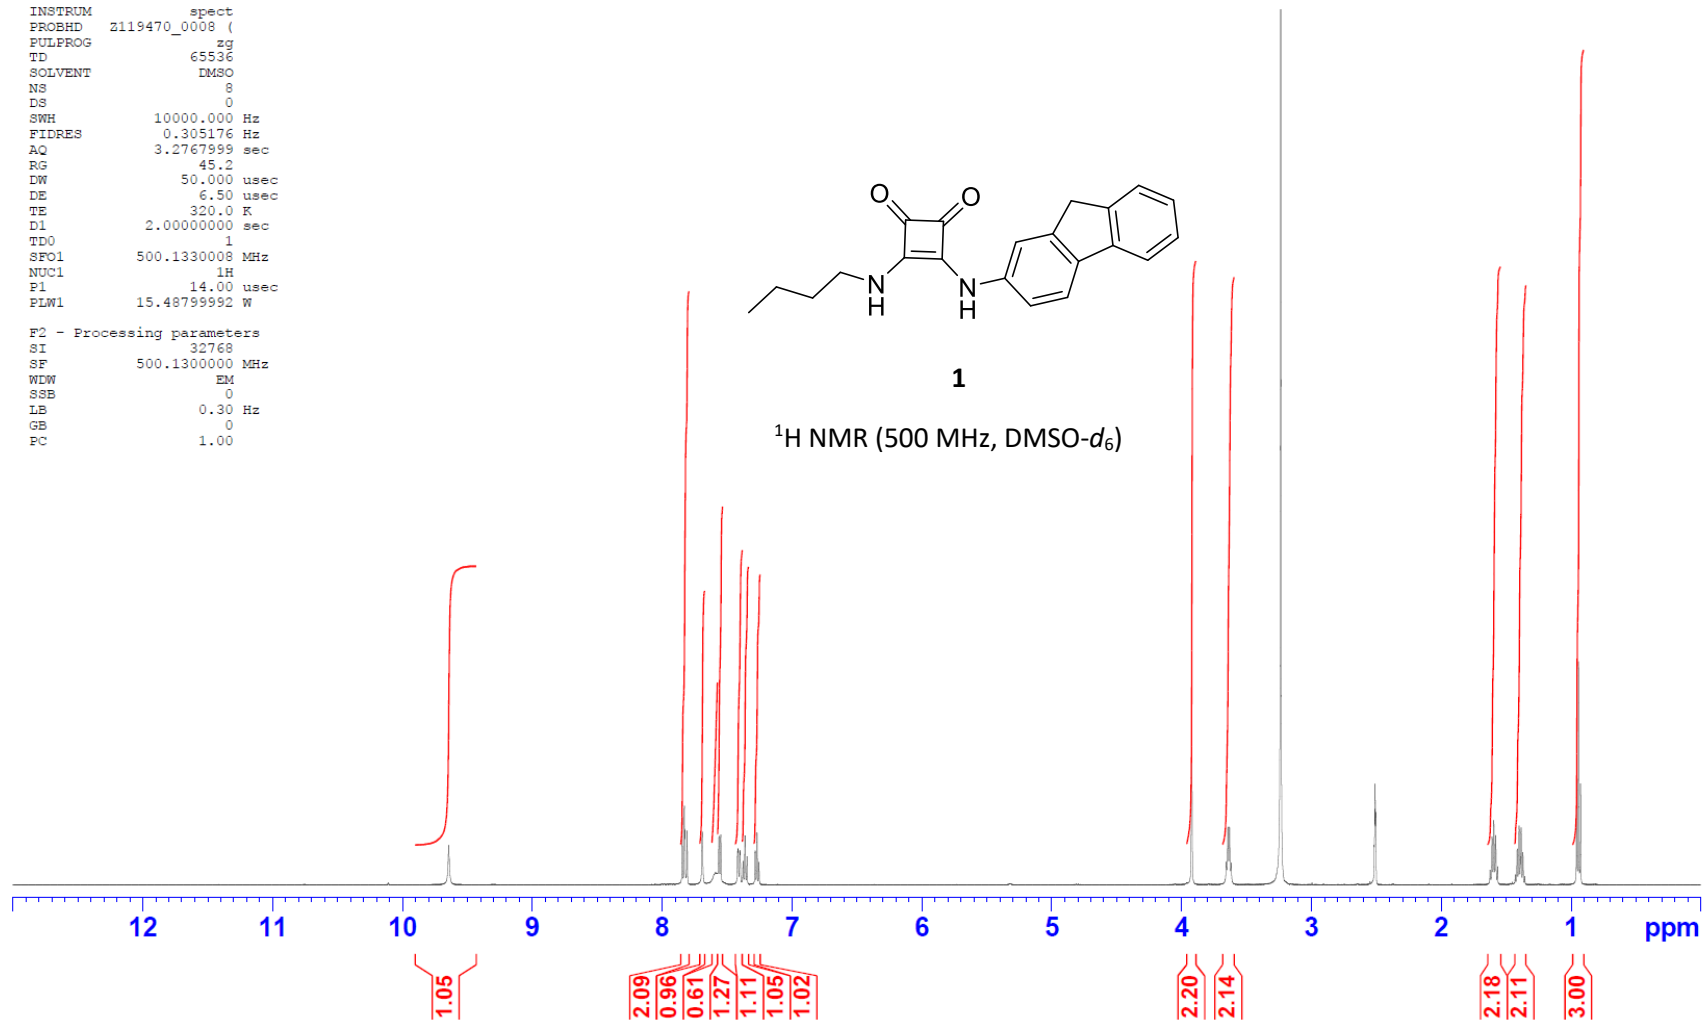

Current Data Parameters  
 NAME 210519\_jlan8805\_50050911124  
 EXPNO 2  
 PROCNO 1

F2 - Acquisition Parameters  
 Date\_ 20210519  
 Time\_ 16.58 h  
 INSTRUM spect  
 PROBHD zll19470\_0008 (zpgp30)  
 PULPROG zgpg30  
 TD 65536  
 SOLVENT DMSO  
 NS 6042  
 DS 4  
 SWH 28846.154 Hz  
 FIDRES 0.880315 Hz  
 AQ 1.1359574 sec  
 RG 203  
 DW 17.333 usec  
 DE 6.50 usec  
 TE 319.9 K  
 D1 2.00000000 sec  
 D11 0.03000000 sec  
 TD0 25  
 SFO1 125.7697337 MHz  
 NUC1 13C  
 P0 3.40 usec  
 P1 10.20 usec  
 PLW1 88.91999817 W  
 SFO2 500.1320005 MHz  
 NUC2 1H  
 CDPFG[2] waltz16  
 PCPD2 80.00 usec  
 PLW2 15.48799992 W  
 PLW12 0.34847999 W  
 PLW13 0.17528000 W

F2 - Processing parameters  
 SI 65536  
 SF 125.7577890 MHz  
 WDW EM  
 SSB 0  
 LB 1.00 Hz  
 GB 0  
 FC 1.40

184.510  
 180.869  
 169.814  
 163.906  
 144.974  
 143.136  
 141.345  
 138.618  
 136.444  
 127.225  
 126.523  
 125.443  
 121.103  
 119.862  
 117.571  
 115.461  
 43.895  
 37.044  
 33.145  
 19.490  
 13.912

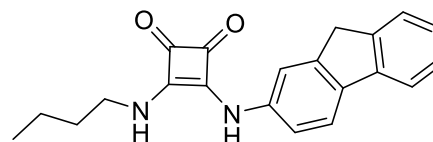

1

<sup>13</sup>C NMR (125 MHz, DMSO-d<sub>6</sub>)

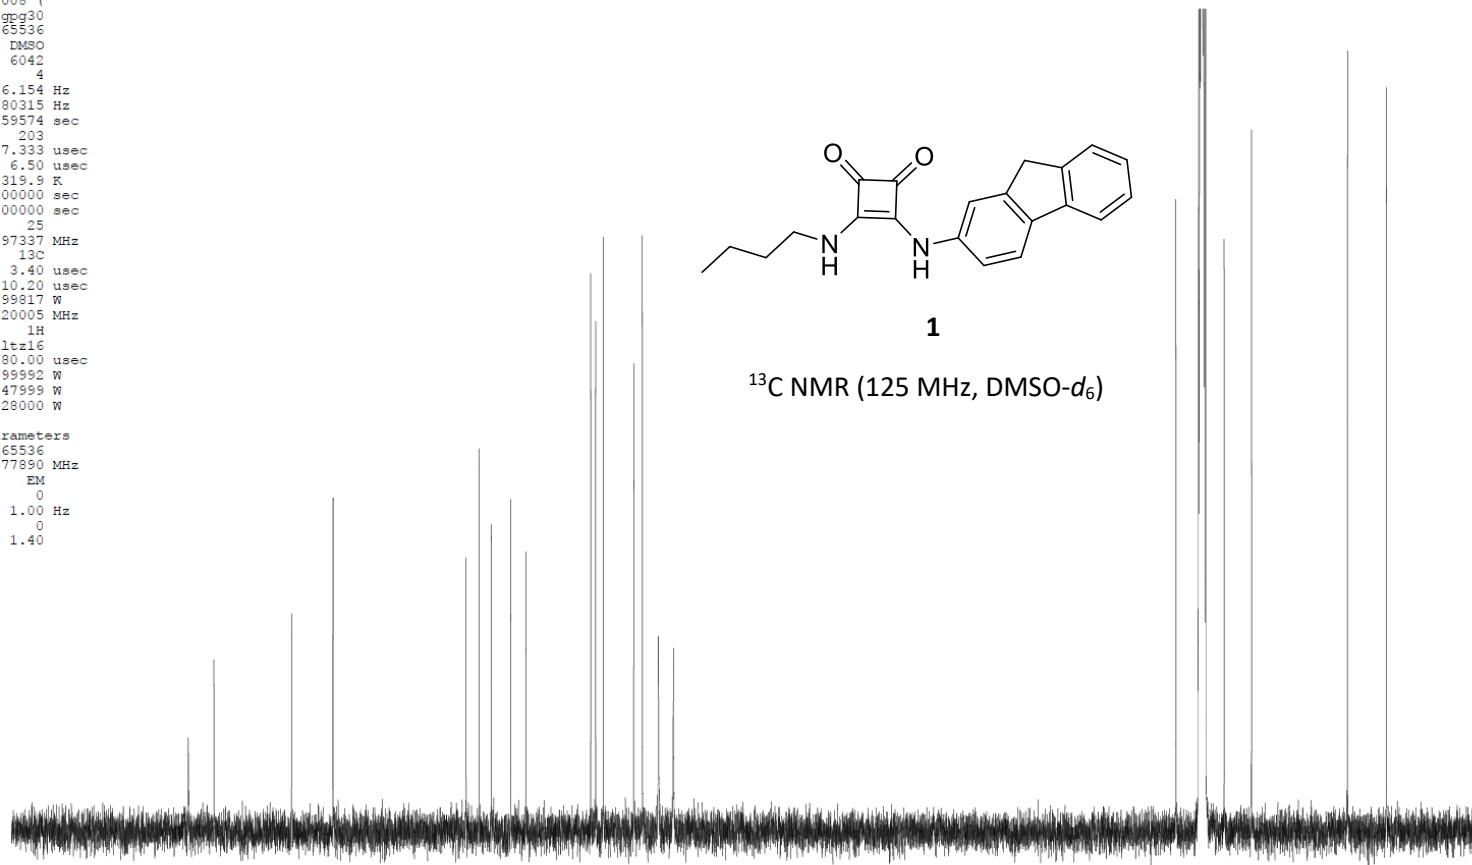

230 220 210 200 190 180 170 160 150 140 130 120 110 100 90 80 70 60 50 40 30 20 ppm

Current Data Parameters  
NAME 210514\_jlan8805\_50050753522  
EXFNO 1  
PROCNO 1

F2 - Acquisition Parameters  
Date\_ 20210514  
Time 12.26 h  
INSTRUM spect  
PROBHD Z119470\_0008 (  
PULPROG zg  
TD 65536  
SOLVENT DMSO  
NS 8  
DS 0  
SWH 10000.000 Hz  
FIDRES 0.305176 Hz  
AQ 3.2767999 sec  
RG 45.2  
DW 50.000 usec  
DE 6.50 usec  
TE 320.1 K  
D1 2.0000000 sec  
TDO 1  
SF01 500.1330008 MHz  
NUC1 1H  
F1 14.00 usec  
FLW1 15.48799992 W

F2 - Processing parameters  
SI 32768  
SF 500.1300000 MHz  
WDW EM  
SSB 0  
LB 3.00 Hz  
GB 0  
PC 1.00

— 10.027

7.891  
7.875  
7.844  
7.829  
7.768  
7.577  
7.562  
7.508  
7.492  
7.388  
7.373  
7.359  
7.301  
7.286  
7.272

— 3.948

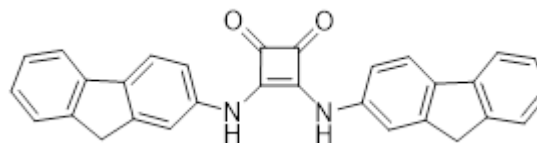

2

<sup>1</sup>H NMR (500 MHz, DMSO-d<sub>6</sub>)

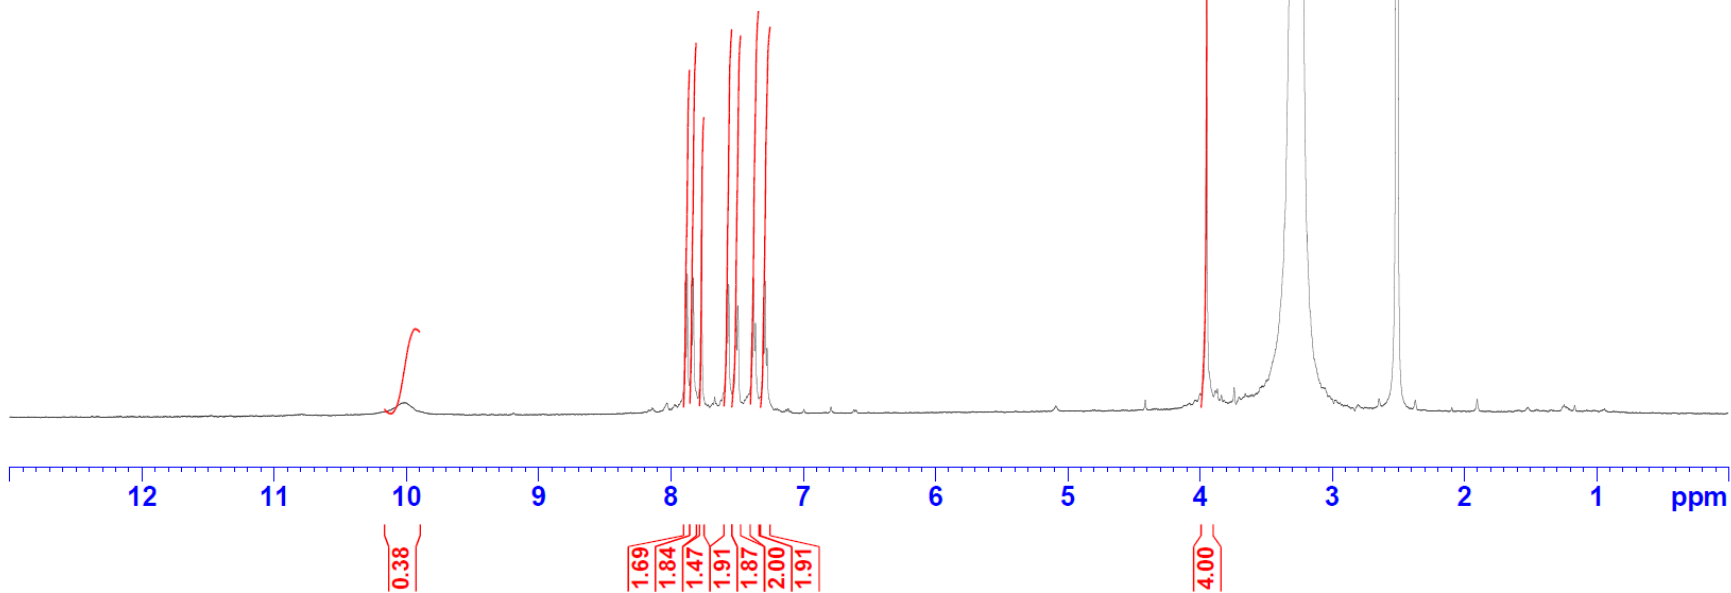

Current Data Parameters  
NAME 210514\_jlan8805\_50050753522  
EXPNO 2  
PROCNO 1

F2 - Acquisition Parameters  
Date\_ 20210515  
Time 7.23 h  
INSTRUM spect  
PROBHD z119470.0009 ( )  
PULPROG zgpg30  
TD 65536  
SOLVENT DMSO  
NS 21297  
DS 4  
SWH 28846.154 Hz  
FIDRES 0.880315 Hz  
AQ 1.1359574 sec  
RG 203  
DW 17.333 usec  
DE 6.50 usec  
TE 320.0 K  
D1 2.00000000 sec  
D11 0.03000000 sec  
TD0 25  
SFO1 125.7697337 MHz  
NUC1 13C  
P0 3.40 usec  
F1 10.20 usec  
PLW1 88.91999917 W  
SFO2 500.1320005 MHz  
NUC2 1H  
CPDPRG[2] waltz16  
PCPD2 80.00 usec  
PLW2 15.48799992 W  
PLW12 0.34847999 W  
PLW13 0.17528000 W

F2 - Processing parameters  
SI 65536  
SF 125.7577890 MHz  
WDW EM  
SSB 0  
LB 1.00 Hz  
GB 0  
FC 1.40

— 182.255

— 166.054

144.951  
143.244  
141.218  
138.143  
137.110  
127.264  
126.703  
125.482  
121.117  
119.999  
118.126  
116.008

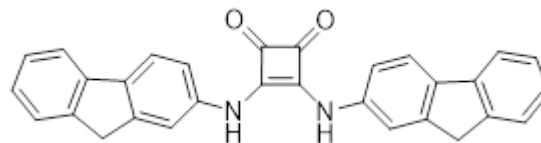

2

<sup>13</sup>C NMR (125 MHz, DMSO-d<sub>6</sub>)

— 37.061

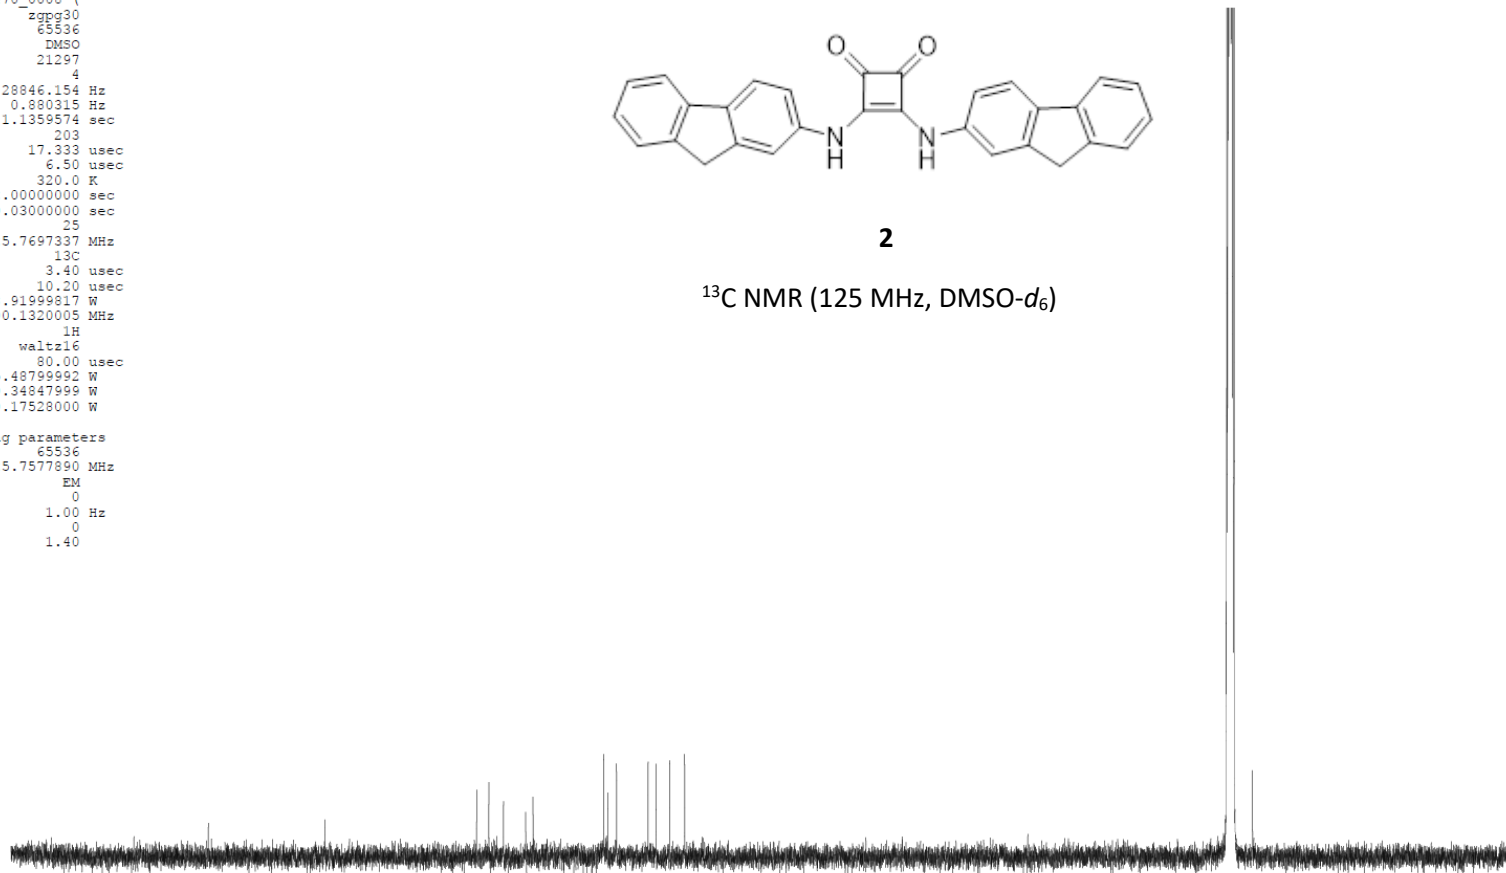

220 210 200 190 180 170 160 150 140 130 120 110 100 90 80 70 60 50 40 30 20 ppm

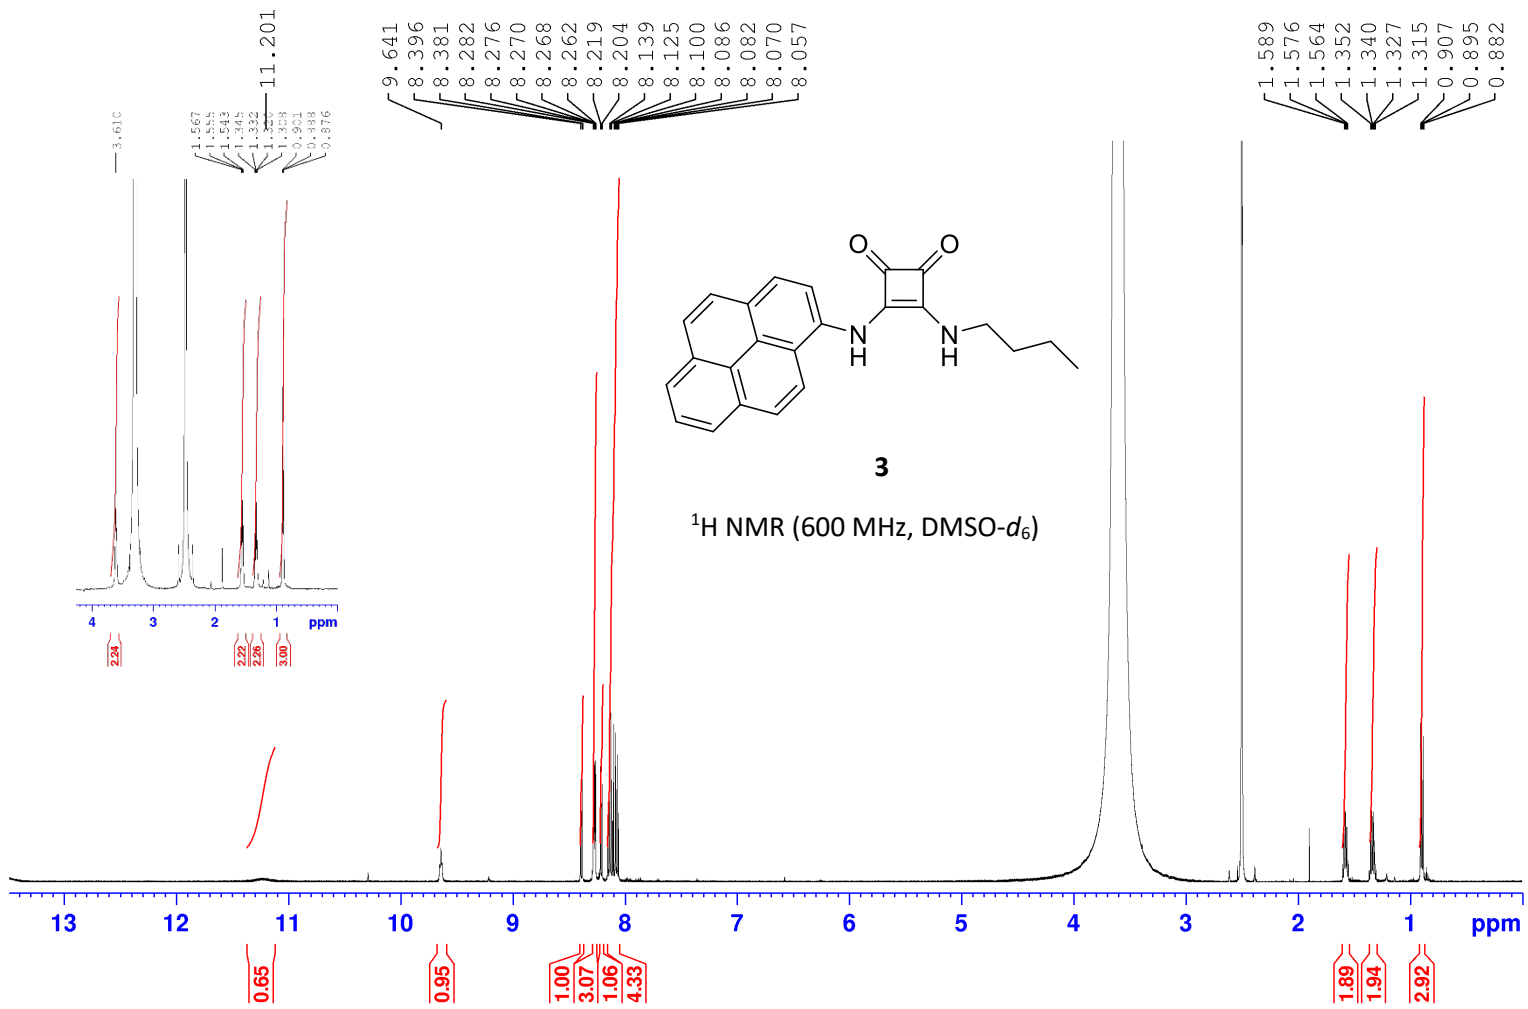

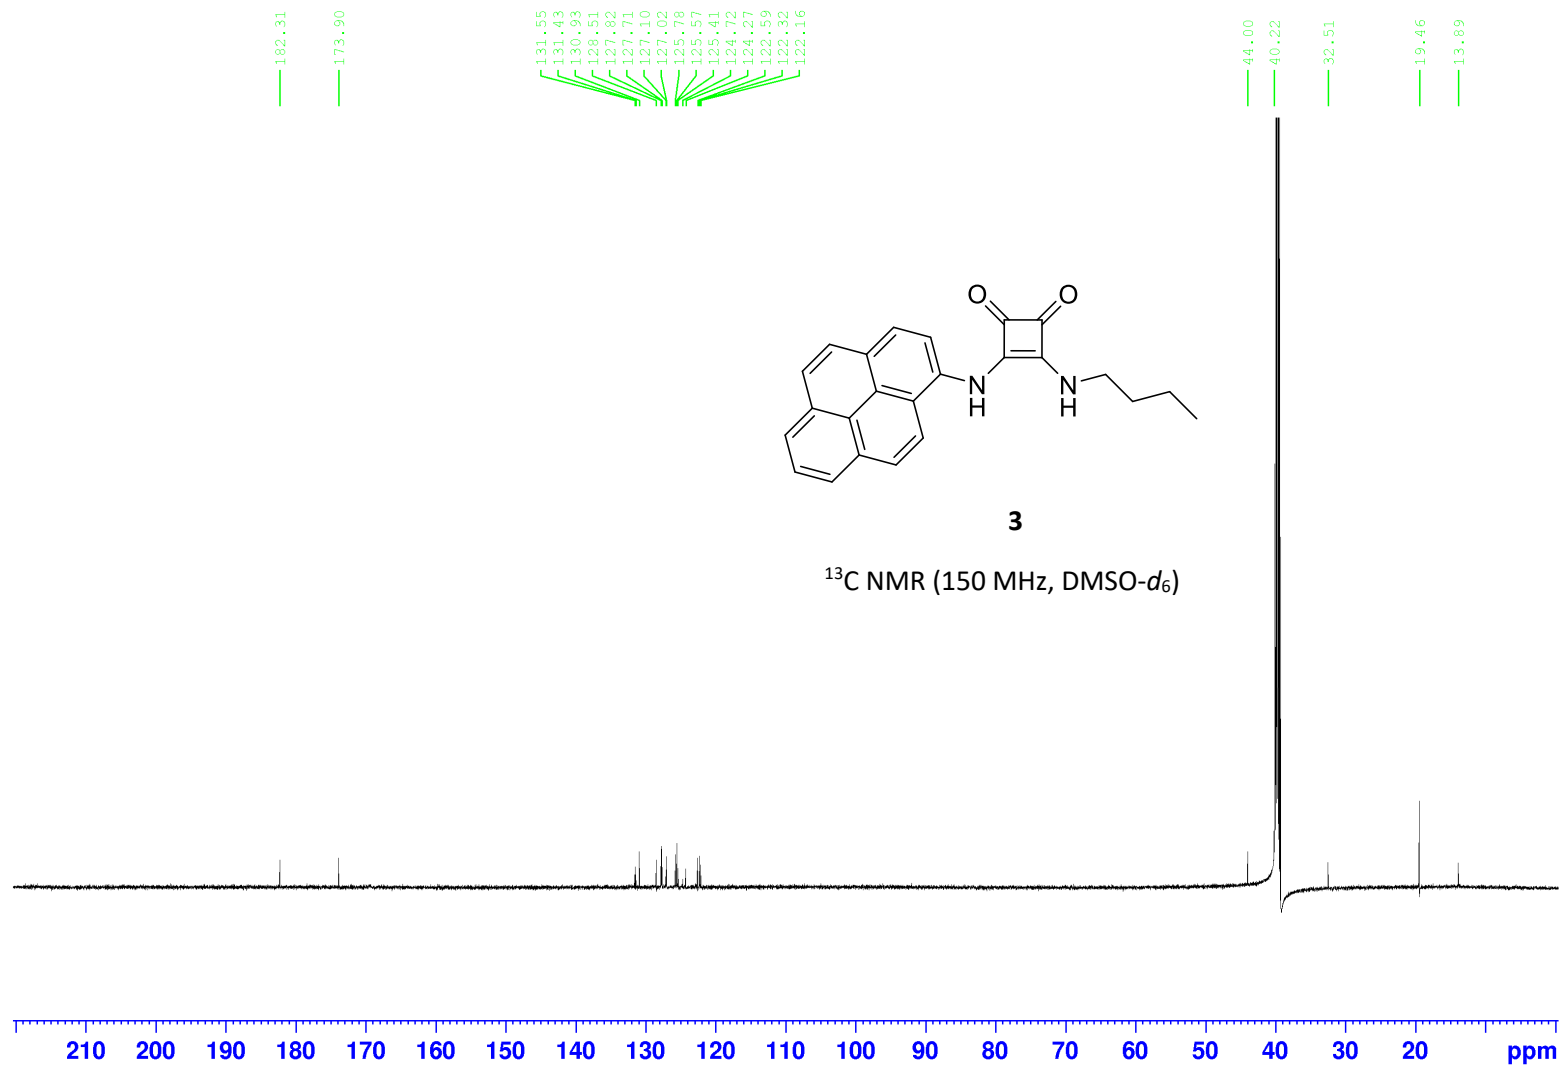

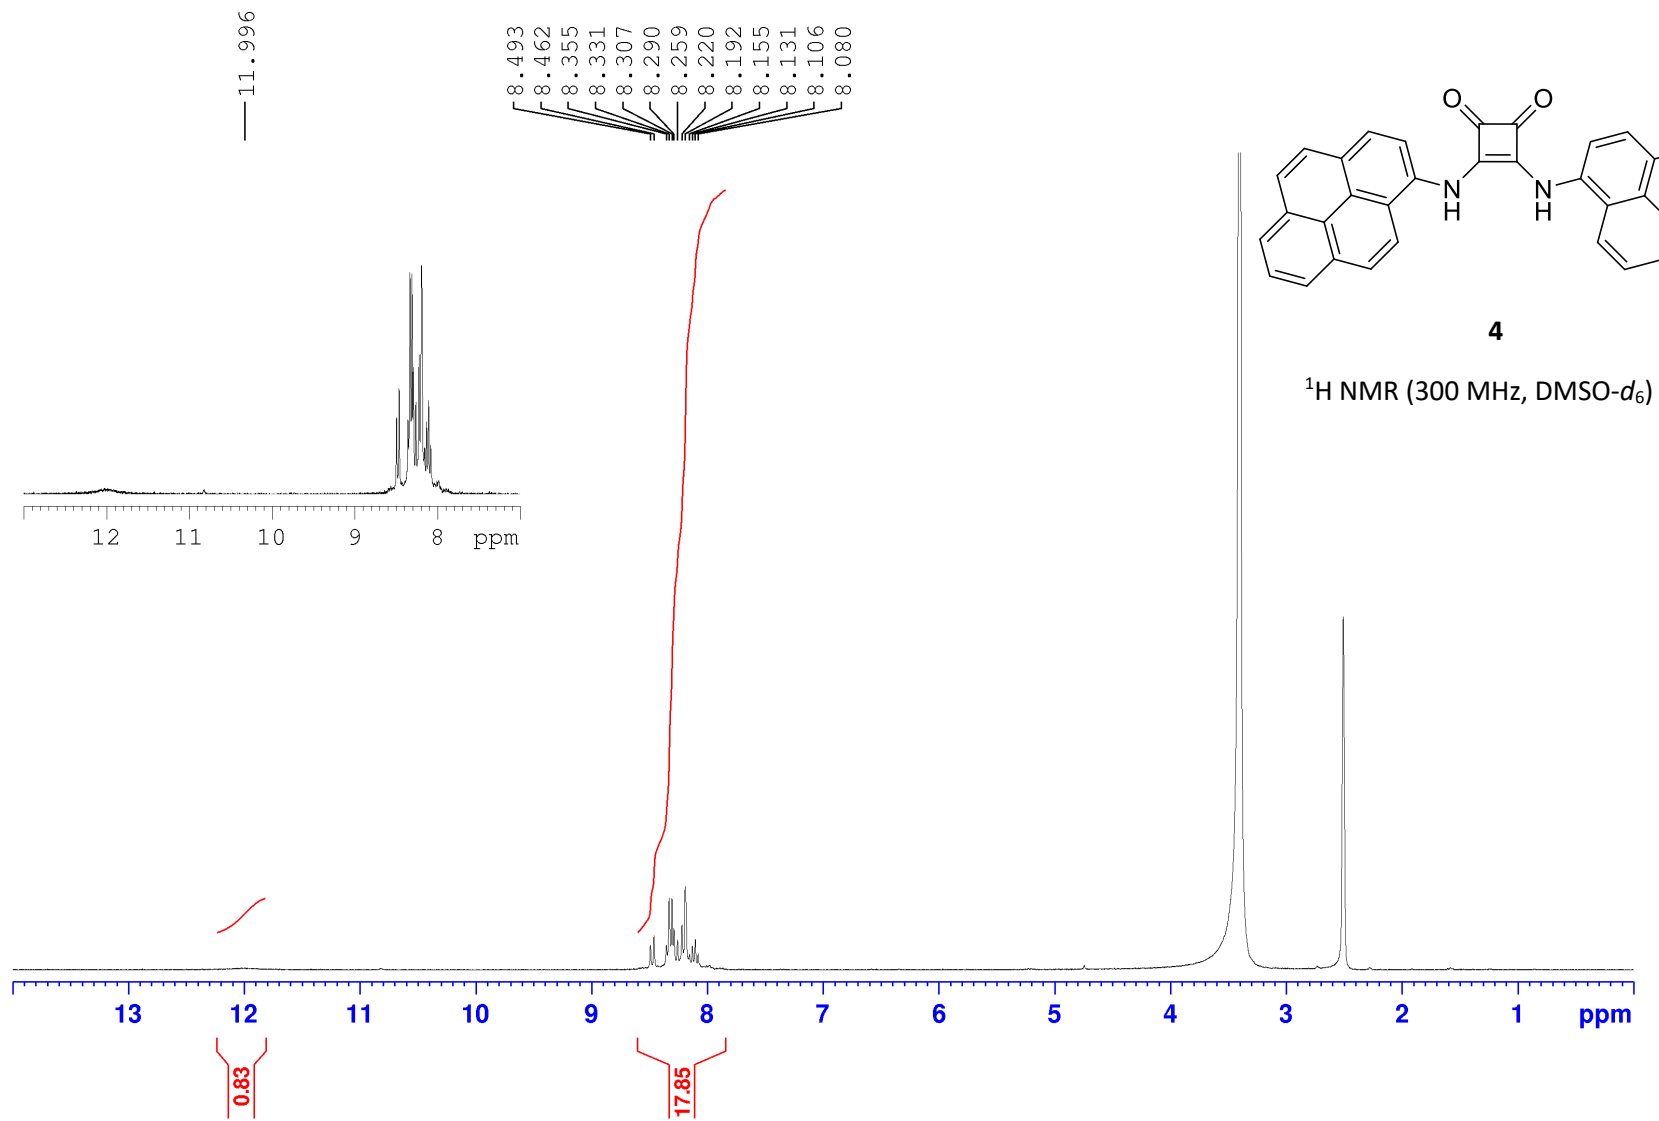

Current Data Parameters  
 NAME 210508\_jlan8805\_50051074844  
 EXPNO 1  
 PROCNO 1

F2 - Acquisition Parameters  
 Date\_ 20210508  
 Time 18.29 h  
 INSTRUM spect  
 PROBHD Z119470\_0008 (   
 PULPROG zg  
 TD 65536  
 SOLVENT DMSO  
 NS 8  
 DS 0  
 SWH 10000.000 Hz  
 FIDRES 0.305176 Hz  
 AQ 3.2767999 sec  
 RG 71.8  
 DW 50.000 usec  
 DE 6.50 usec  
 TE 300.0 K  
 D1 2.00000000 sec  
 TD0 1  
 SFO1 500.1330008 MHz  
 NUC1 1H  
 P1 14.00 usec  
 PLW1 15.48799992 W

F2 - Processing parameters  
 SI 32768  
 SF 500.1300000 MHz  
 WDW EM  
 SSB 0  
 LB 0.30 Hz  
 GB 0  
 PC 1.00

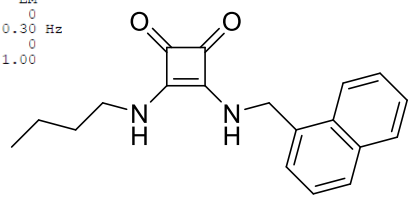

5

<sup>1</sup>H NMR (500 MHz, DMSO-d<sub>6</sub>)

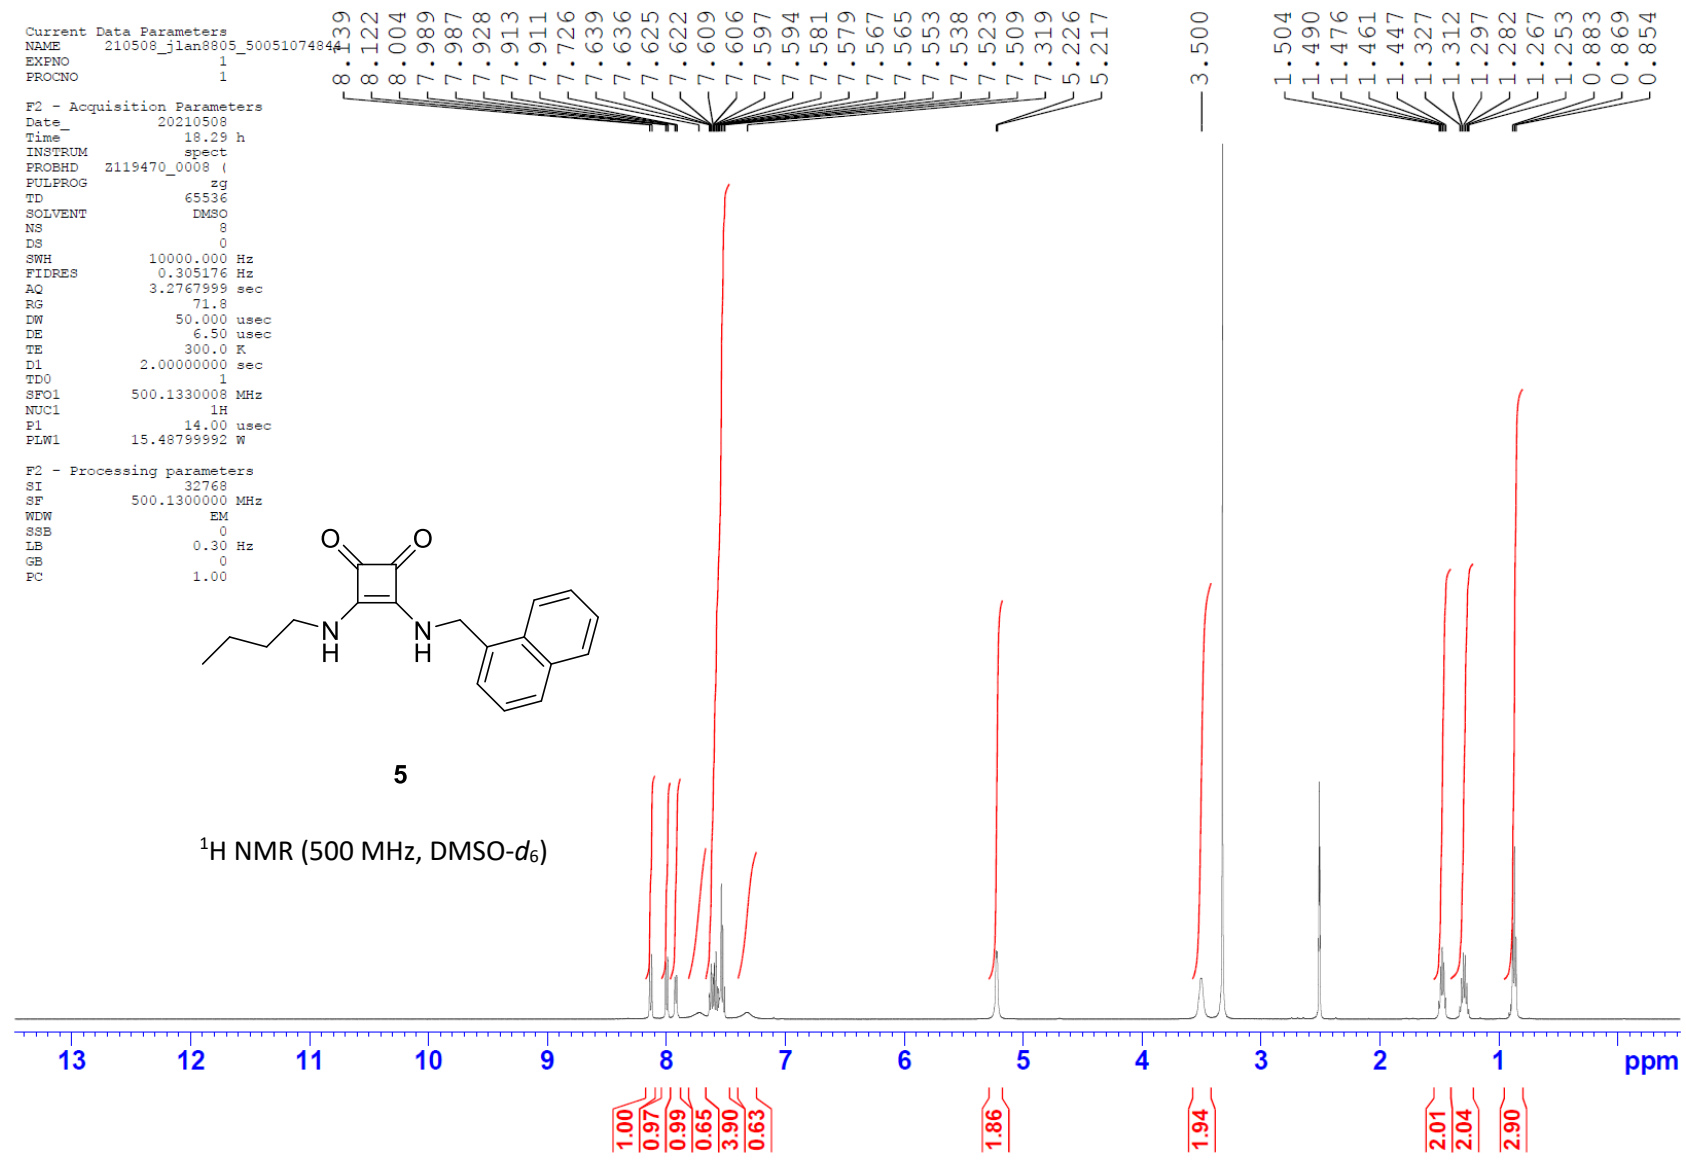



Current Data Parameters  
NAME 210508\_jlan8805\_500510748  
EXPNO 2  
PROCNO 1

F2 - Acquisition Parameters  
Date\_ 20210509  
Time\_ 1.49 h  
INSTRUM spect  
PROBHD Z119470\_0008 (  
PULPROG zgpg30  
TD 65536  
SOLVENT DMSO  
NS 8192  
DS 4  
SWH 28846.154 Hz  
FIDRES 0.880315 Hz  
AQ 1.1359574 sec  
RG 203  
DW 17.333 usec  
DE 6.50 usec  
TE 300.0 K  
D1 2.0000000 sec  
D11 0.0300000 sec  
TD0 8  
SFO1 125.7697337 MHz  
NUC1 13C  
P0 3.40 usec  
P1 10.20 usec  
PLW1 88.91999817 W  
SFO2 500.1320005 MHz  
NUC2 1H  
CPDPRG2 waltz16  
PCPD2 80.00 usec  
PLW2 15.48799992 W  
PLW12 0.34847999 W  
PLW13 0.17528000 W

F2 - Processing parameters  
SI 65536  
SF 125.7577890 MHz  
WDW EM  
SSB 0  
LB 1.00 Hz  
GB 0  
PC 1.40

183.043  
182.835

168.441  
167.722

134.735  
133.935  
131.148  
129.161  
128.716  
128.696  
127.075  
126.519  
126.094  
123.749

45.146  
43.427

33.182

19.451  
13.944

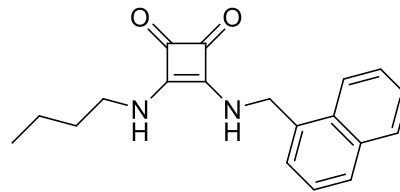

5

<sup>13</sup>C NMR (125 MHz, DMSO-d<sub>6</sub>)

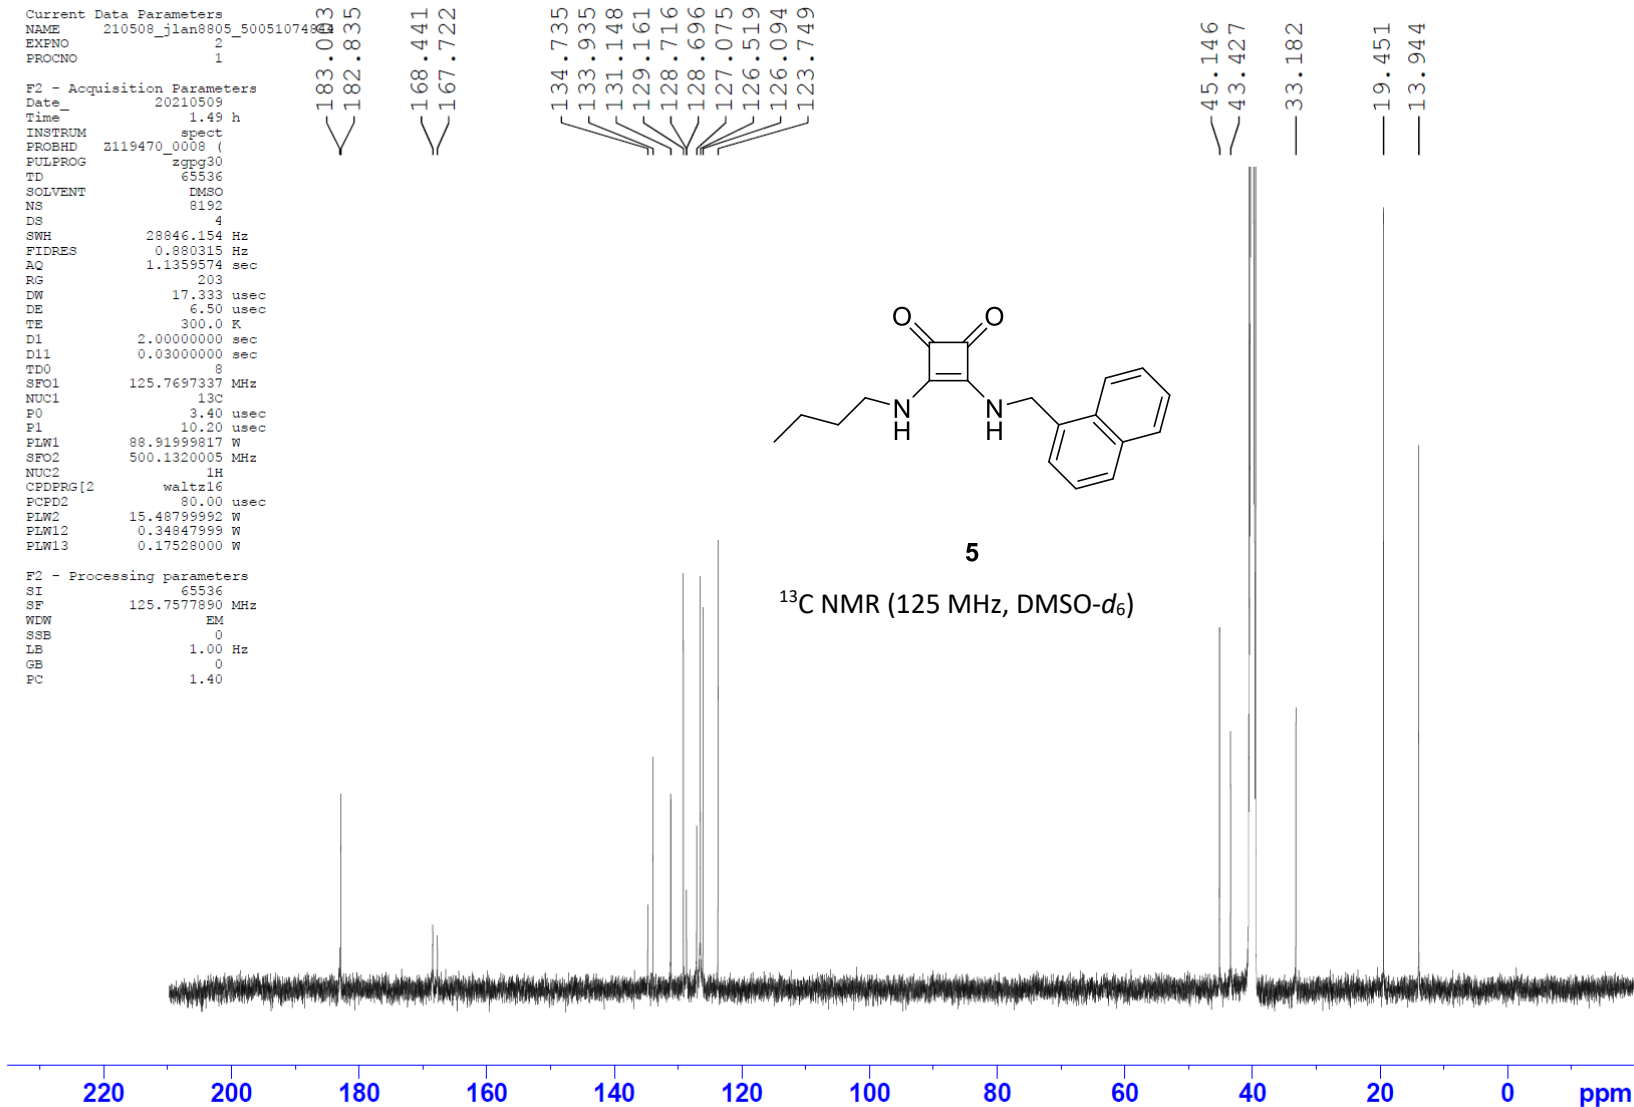

Current Data Parameters  
 NAME Sq (MeNp) 2108  
 EXPNO 16  
 PROCNO 1

F2 - Acquisition Parameters  
 Date\_ 20210413  
 Time\_ 11.46 h  
 INSTRUM spect  
 PROBHD Z108618\_0516 (  
 PULPROG zg  
 TD 48076  
 SOLVENT DMSO  
 NS 16  
 DS 0  
 SWH 8000.000 Hz  
 FIDRES 0.332806 Hz  
 AQ 3.0047500 sec  
 RG 203  
 DW 62.500 usec  
 DE 10.20 usec  
 TE 300.1 K  
 D1 5.00000000 sec  
 TD0 1  
 SF01 400.1324008 MHz  
 NUC1 1H  
 P1 14.90 usec  
 PLW1 11.99499989 W

F2 - Processing parameters  
 SI 32768  
 SF 400.1300000 MHz  
 WDW EM  
 SSB 0  
 LB 0.30 Hz  
 GB 0  
 PC 1.00

8.1108  
 7.987  
 7.969  
 7.964  
 7.911  
 7.893  
 7.888  
 7.744  
 7.612  
 7.597  
 7.579  
 7.575  
 7.560  
 7.557  
 7.543  
 7.539  
 7.507  
 7.489  
 7.472

5.219  
 5.205

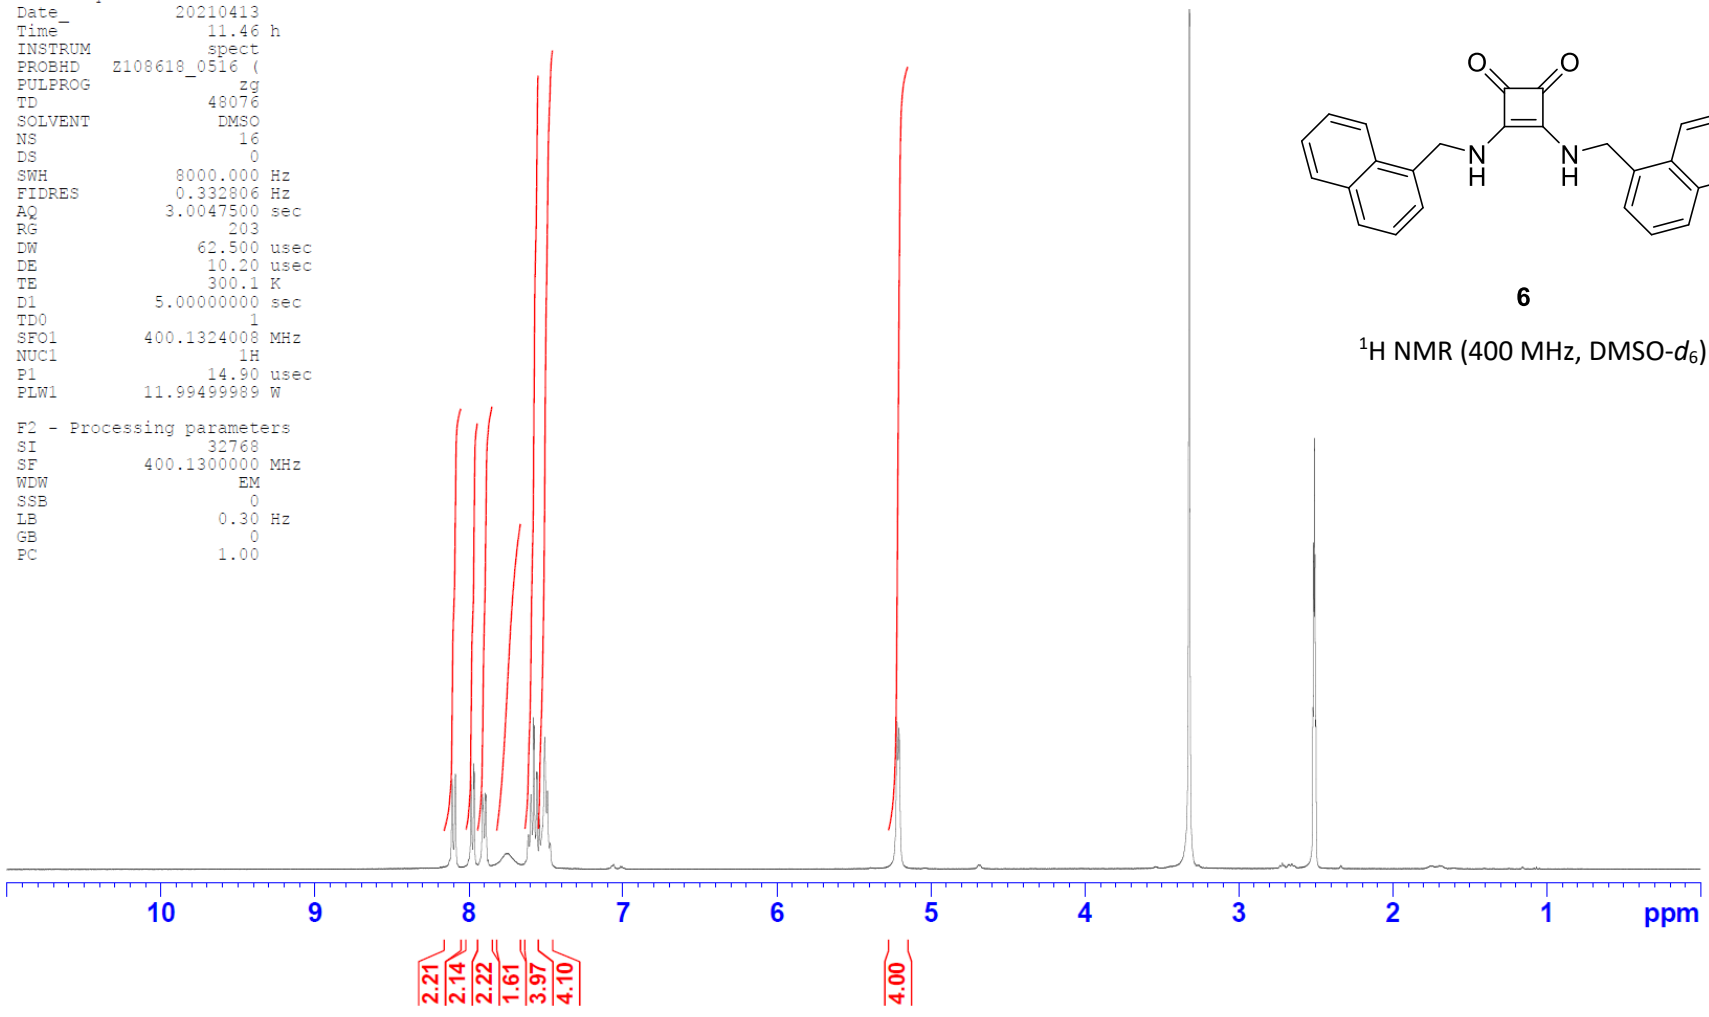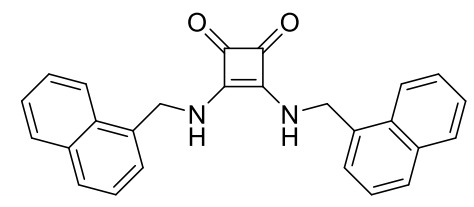

6

<sup>1</sup>H NMR (400 MHz, DMSO-*d*<sub>6</sub>)

Current Data Parameters  
NAME Sq(CH2)Np2\_13C  
EXPNO 1  
PROCNO 1

F2 - Acquisition Parameters  
Date\_ 20210502  
Time\_ 12.36 h  
INSTRUM spect  
PROBHD Z108618\_0516 (  
PULPROG zgpg30  
TD 65536  
SOLVENT DMSO  
NS 245  
DS 4  
SWH 25252.525 Hz  
FIDRES 0.770646 Hz  
AQ 1.2976128 sec  
RG 203  
DW 19.800 usec  
DE 6.50 usec  
TE 300.0 K  
D1 2.00000000 sec  
D11 0.03000000 sec  
TD0 25  
SFO1 100.6228303 MHz  
NUC1 13C  
P0 3.27 usec  
P1 9.80 usec  
PLW1 77.98300171 W  
SFO2 400.1316005 MHz  
NUC2 1H  
CPDPRG[2] waltz16  
PCPD2 90.00 usec  
PLW2 11.99499989 W  
PLW12 0.32877001 W  
PLW13 0.16537000 W

F2 - Processing parameters  
SI 65536  
SF 100.6127690 MHz  
WDW EM  
SSB 0  
LB 1.00 Hz  
GB 0  
PC 1.40

—183.127

—167.957

134.571  
133.927  
131.127  
129.159  
128.745  
128.737  
127.087  
126.510  
126.070  
123.693

—45.222

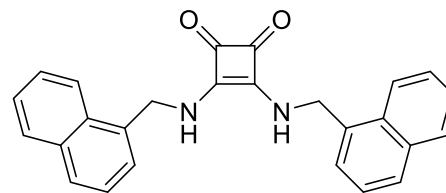

6

<sup>13</sup>C NMR (100 MHz, DMSO-d<sub>6</sub>)

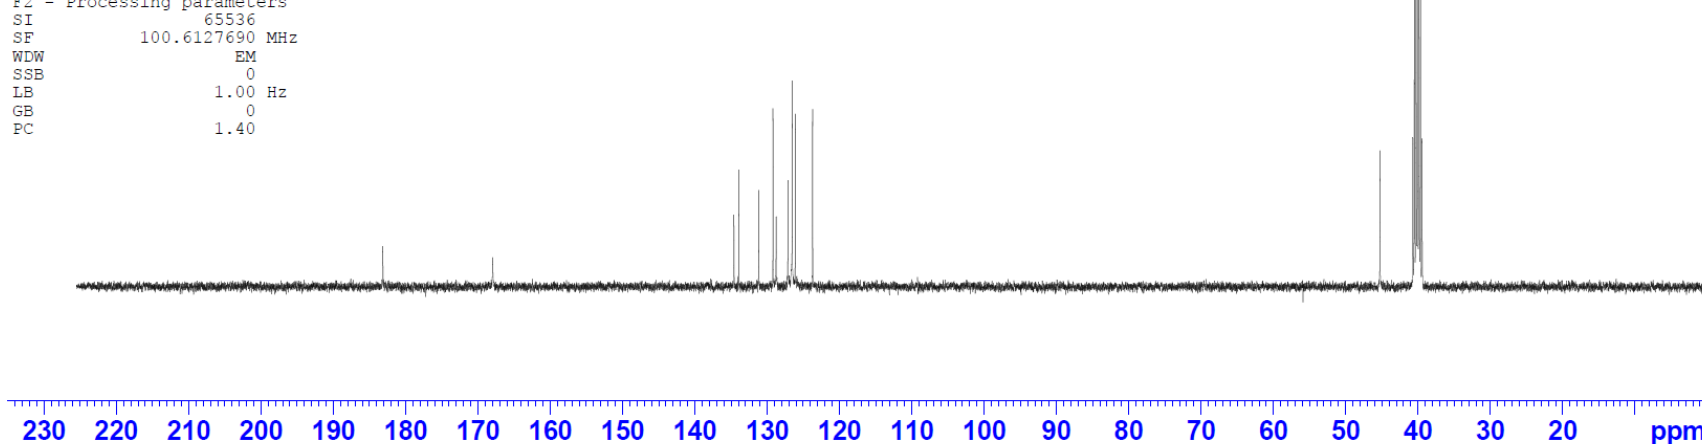

Current Data Parameters  
NAME 210508\_jlan805\_50038924685  
EXPNO 1  
PROCNO 1

F2 - Acquisition Parameters  
Date\_ 20210509  
Time\_ 1.55 h  
INSTRUM spect  
PROBHD z119470\_0008 (  
PULPROG zg  
TD 65536  
SOLVENT DMSO  
NS 8  
DS 0  
SWH 10000.000 Hz  
FIDRES 0.305176 Hz  
AQ 3.2767999 sec  
RG 45.2  
DW 50.000 usec  
DE 6.50 usec  
TE 300.0 K  
D1 2.00000000 sec  
TD0 1  
SF01 500.1330008 MHz  
NUC1 1H  
P1 14.00 usec  
PLWL 15.48799992 W

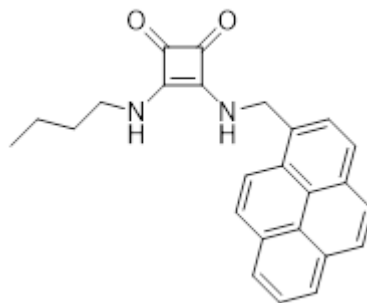

7

<sup>1</sup>H NMR (500 MHz, DMSO-*d*<sub>6</sub>)

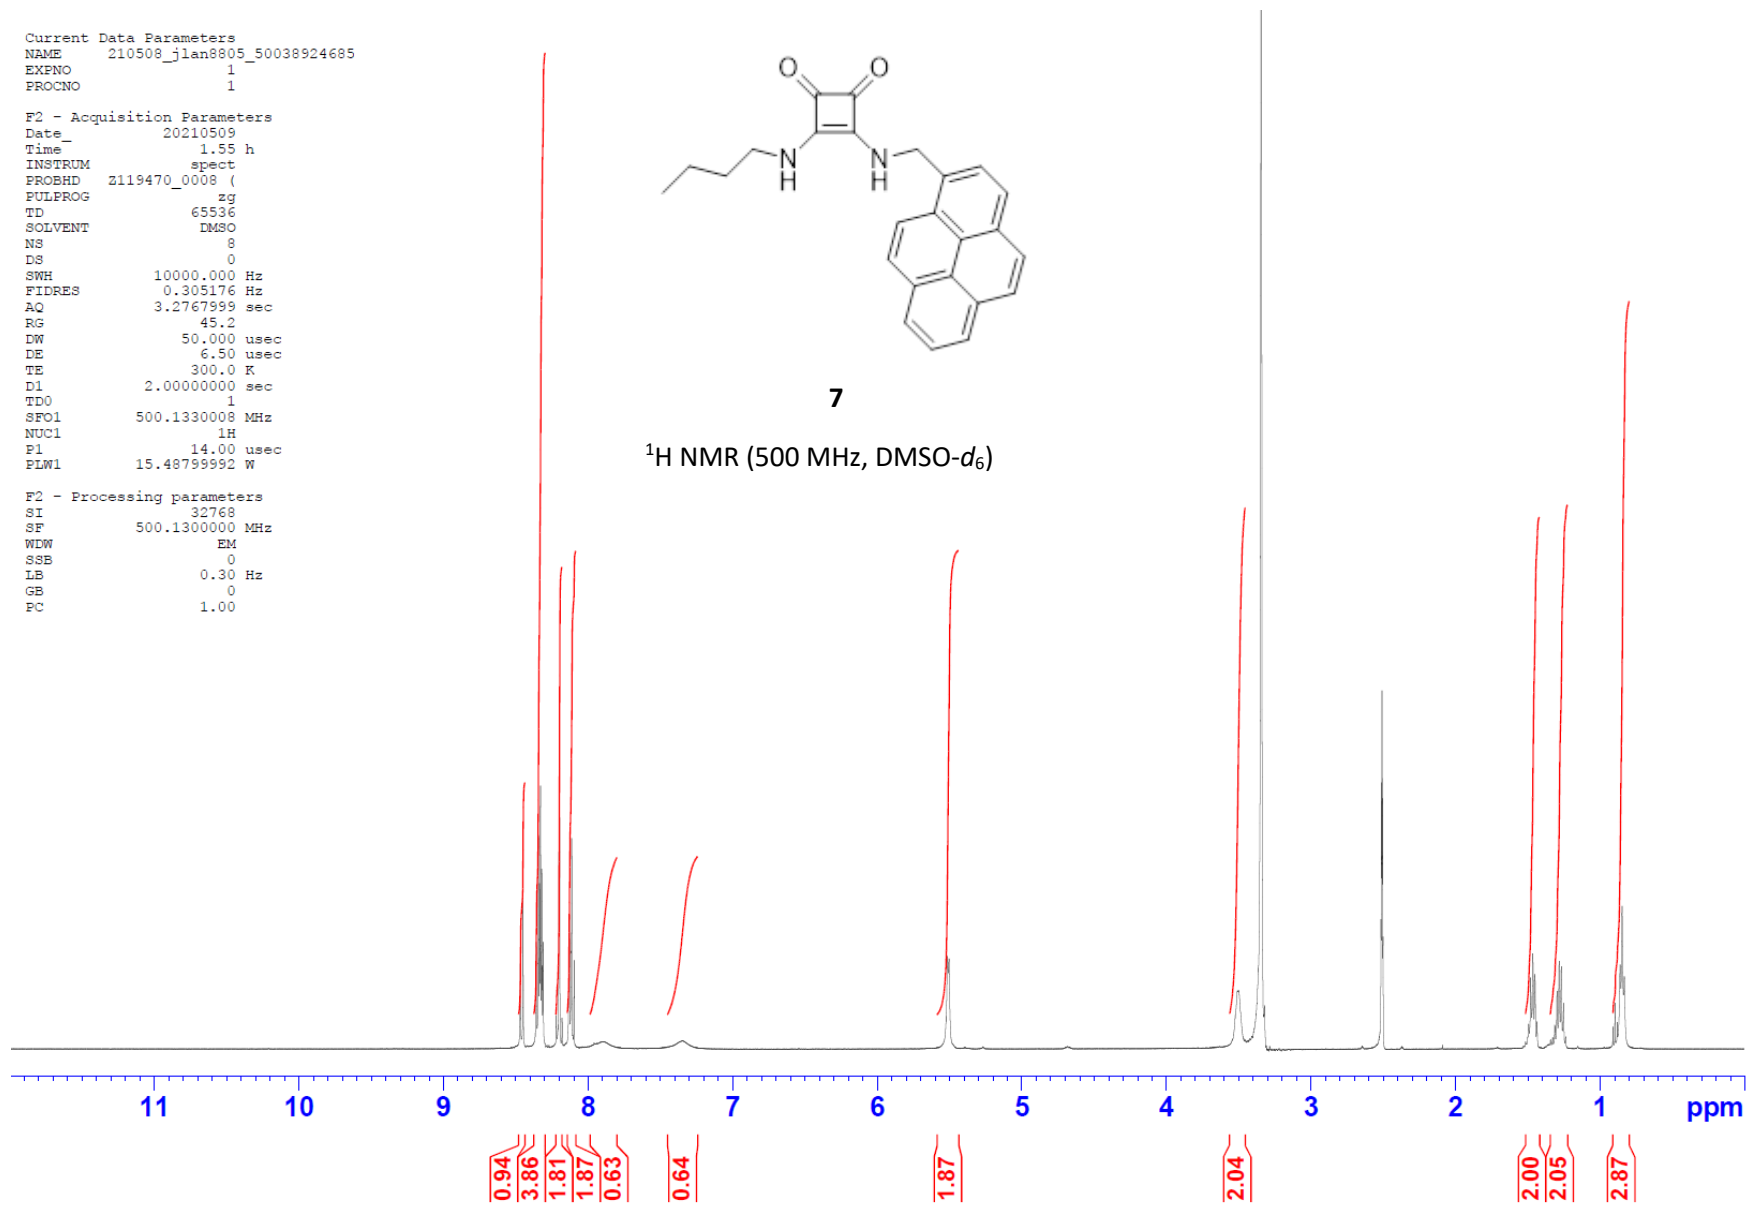

Current Data Parameters  
NAME 210508\_jlan8805\_50038924685  
EXFNO 2  
PROCNO 1

F2 - Acquisition Parameters  
Date\_ 20210509  
Time 11.04 h  
INSTRUM spect  
PROBHD Z119470\_0008 ( zppg30  
PULPROG 65536  
TD 10240  
SOLVENT DMSO  
NS 4  
DS 28846.154 Hz  
SWH 0.880315 Hz  
FIDRES 1.1359574 sec  
AQ 203  
RG 17.333 usec  
DW 6.50 usec  
DE 300.0 K  
TE 2.00000000 sec  
D1 0.03000000 sec  
TD0 10  
SFO1 125.7697337 MHz  
NUC1 13C  
F0 3.40 usec  
F1 10.20 usec  
PLN1 88.91999917 W  
SFO2 500.1320005 MHz  
NUC2 1H  
CPDPRG[2] waltz16  
PCPD2 80.00 usec  
PLN2 15.48799992 W  
PLN12 0.34847999 W  
PLN13 0.17528000 W

F2 - Processing parameters  
SI 65536  
SF 125.7577890 MHz  
WDW EM  
SSB 0  
LB 1.00 Hz  
GB 0  
PC 1.40

— 182.923

< 168.505  
< 167.668

132.672  
131.258  
131.004  
130.742  
128.562  
127.887  
127.838  
127.295  
126.893  
125.983  
125.850  
125.538  
124.632  
124.364  
123.306

— 79.638

< 45.299  
< 43.441

— 33.174

— 19.437

— 13.922

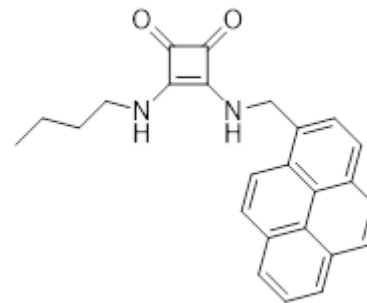

7

<sup>13</sup>C NMR (125 MHz, DMSO-d<sub>6</sub>)

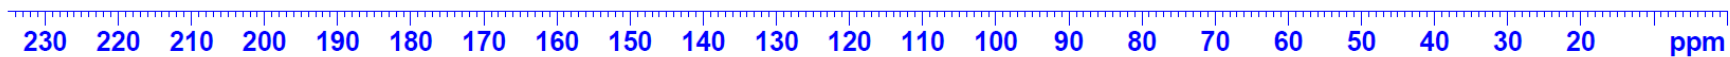

Current Data Parameters  
NAME 210508\_jlan8805\_500509108  
EXPNO 1  
PROCNO 1

F2 - Acquisition Parameters  
Date\_ 20210509  
Time\_ 11.10 h  
INSTRUM spect  
PROBHD z119470\_0008 (  
PULPROG zg  
TD 65536  
SOLVENT DMSO  
NS 8  
DS 0  
SWH 10000.000 Hz  
FIDRES 0.305176 Hz  
AQ 3.2767999 sec  
RG 45.2  
DW 50.000 usec  
DE 6.50 usec  
TE 300.0 K  
D1 2.00000000 sec  
TD0 1  
SFO1 500.1330008 MHz  
NUC1 1H  
P1 14.00 usec  
PLW1 15.48799992 W

F2 - Processing parameters  
SI 32768  
SF 500.1330000 MHz  
WDW EM  
SSB 0  
LB 0.30 Hz  
GB 0  
PC 1.00

8.418  
8.400  
8.318  
8.303  
8.282  
8.273  
8.259  
8.188  
8.170  
8.162  
8.155  
8.137  
8.102  
8.087  
8.071  
7.895

5.505  
5.494

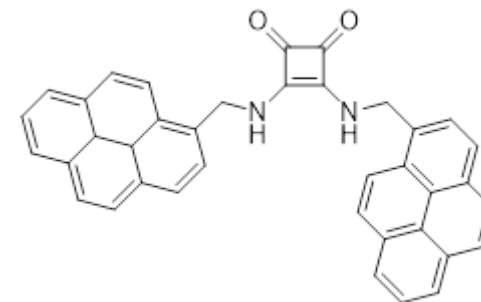

8

<sup>1</sup>H NMR (500 MHz, DMSO-d<sub>6</sub>)

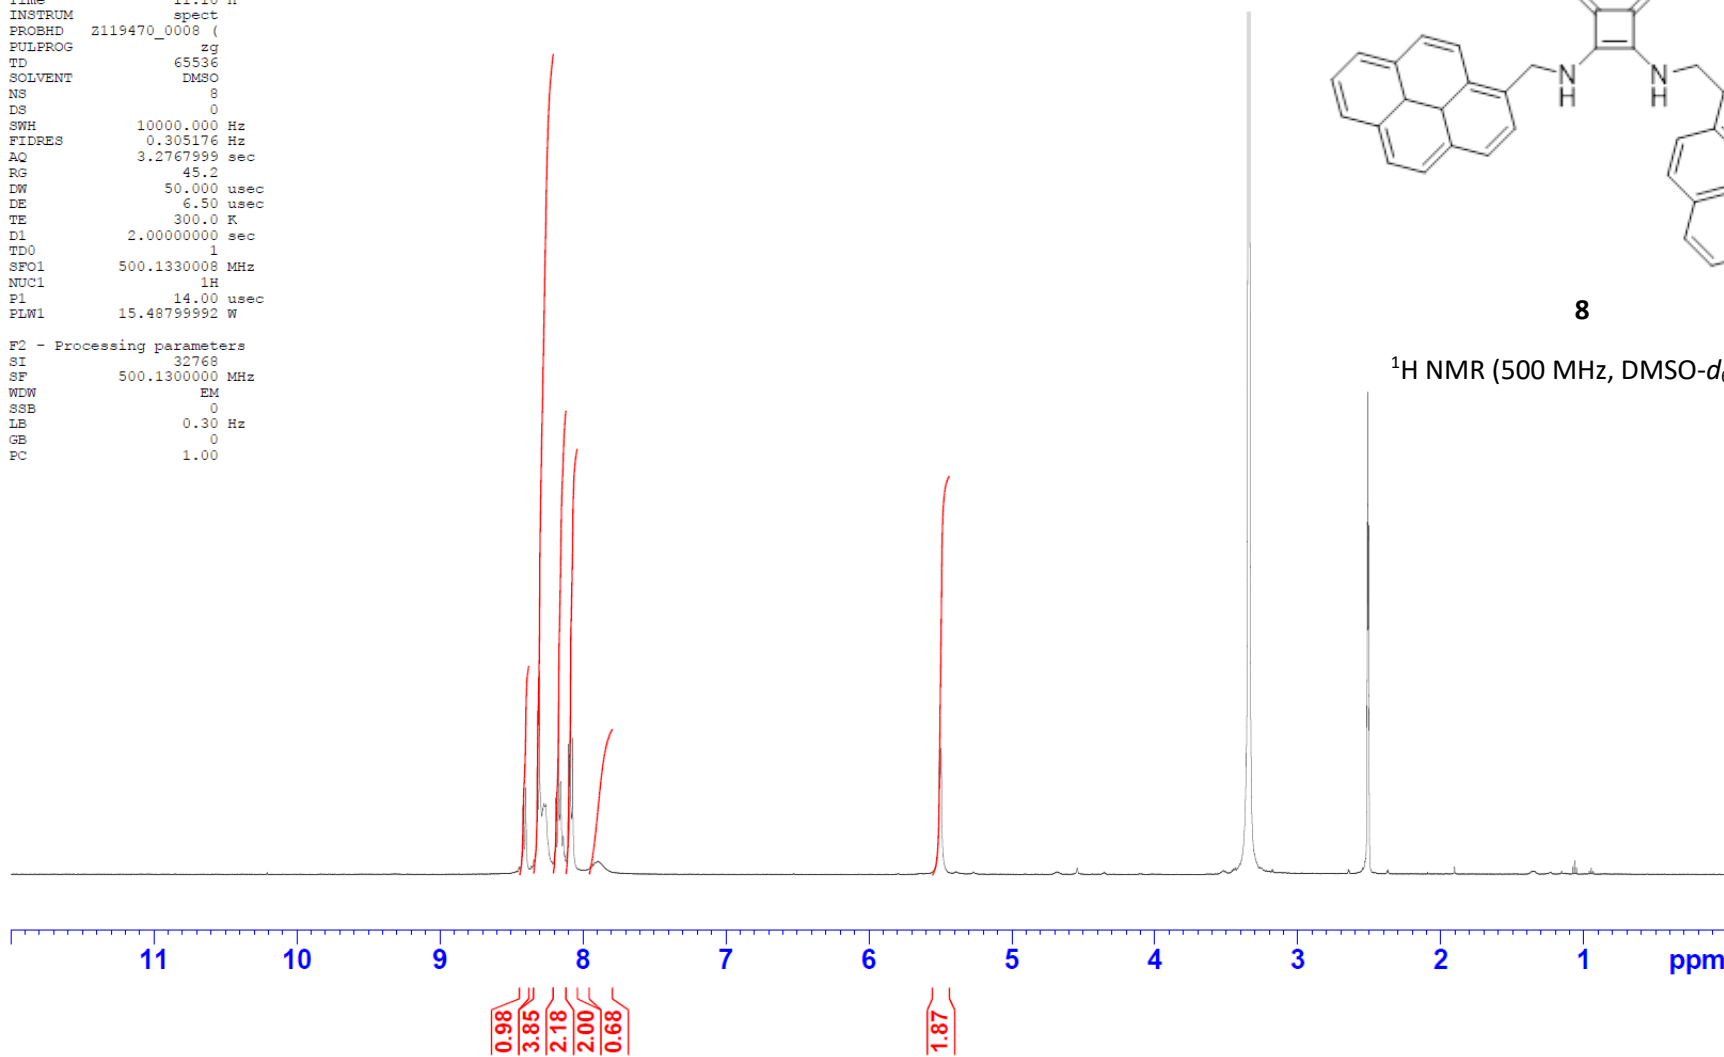

Current Data Parameters  
NAME 210508\_jlan8805\_50050910842  
EXPNO 2  
PROCNO 1

F2 - Acquisition Parameters  
Date\_ 20210509  
Time 20.18 h  
INSTRUM spect  
PROBHD zll19470\_0008 (  
PULPROG zgpg30  
TD 65536  
SOLVENT DMSO  
NS 10240  
DS 4  
SWH 28846.154 Hz  
FIDRES 0.880315 Hz  
AQ 1.1359574 sec  
RG 203  
DW 17.333 usec  
DE 6.50 usec  
TE 300.0 K  
D1 2.00000000 sec  
D11 0.03000000 sec  
TD0 10  
SFO1 125.7697337 MHz  
NUC1 13C  
P0 3.40 usec  
P1 10.20 usec  
PLW1 88.91999817 W  
SFO2 500.1320005 MHz  
NUC2 1H  
CPDPRG[2] waltz16  
PCPD2 80.00 usec  
PLW2 15.48799992 W  
PLW12 0.34847999 W  
PLW13 0.17528000 W

F2 - Processing parameters  
SI 65536  
SF 125.7577890 MHz  
WDW EM  
SSB 0  
LB 1.00 Hz  
GB 0  
PC 1.40

— 183.199

— 167.951

132.425  
131.217  
131.001  
130.689  
128.544  
127.884  
127.790  
127.271  
126.865  
125.972  
125.830  
125.504  
124.593  
124.315  
123.218

— 45.389

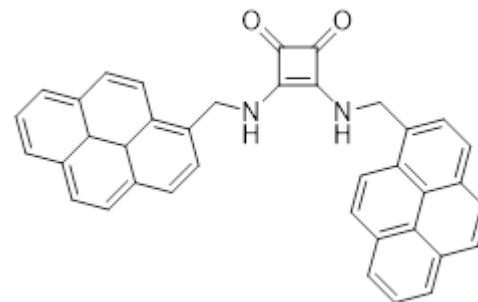

8

<sup>13</sup>C NMR (125 MHz, DMSO-d<sub>6</sub>)

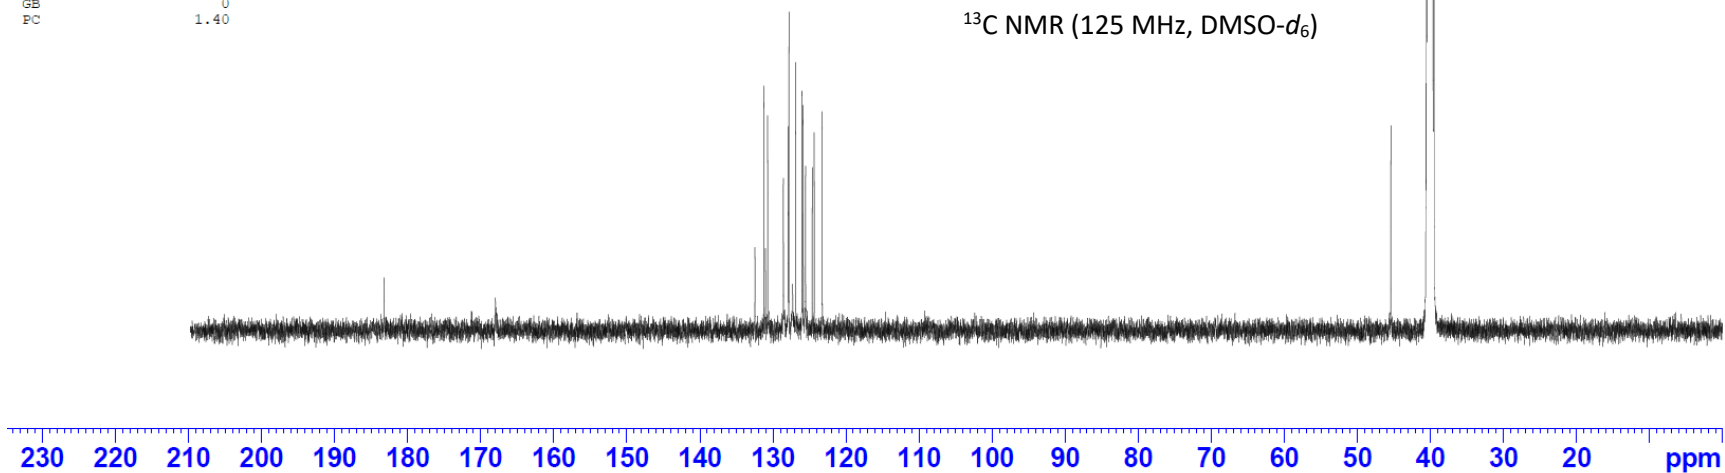

Current Data Parameters  
NAME 210517\_jlan8905\_50050696168  
EXPNO 1  
PROCNO 1

F2 - Acquisition Parameters  
Date\_ 20210517  
Time\_ 12.58 h  
INSTRUM spect  
PROBHD z119470\_0008 (  
PULPROG zg  
TD 65536  
SOLVENT DMSO  
NS 8  
DS 0  
SWH 10000.000 Hz  
FIDRES 0.305176 Hz  
AQ 3.2767999 sec  
RG 45.2  
DW 50.000 usec  
DE 6.50 usec  
TE 320.0 K  
D1 2.00000000 sec  
TD0 1  
SFO1 500.1330008 MHz  
NUC1 1H  
P1 14.00 usec  
PLW1 15.48799992 W

F2 - Processing parameters  
SI 32768  
SF 500.1300000 MHz  
WDW EM  
SSB 0  
LB 0.30 Hz  
GB 0  
PC 1.00

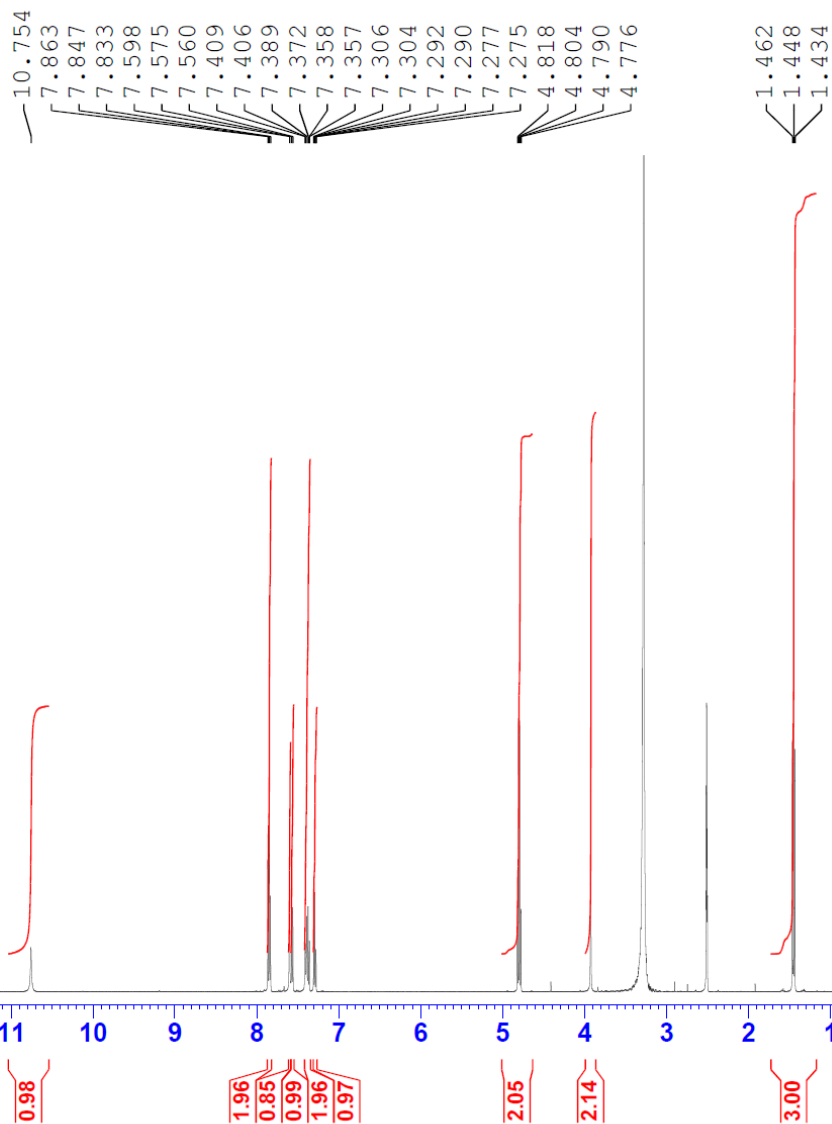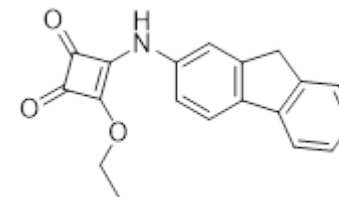

9

$^1\text{H}$  NMR (500 MHz,  $\text{DMSO-}d_6$ )



Current Data Parameters  
 NAME 210517\_glan8805\_5005069616  
 EXPNO 2  
 PROCNO 1

F2 - Acquisition Parameters  
 Date\_ 20210518  
 Time 9.24 h  
 INSTRUM spect  
 PROBHD z119470\_0008 (  
 PULPROG zgpg30  
 TD 65536  
 SOLVENT DMSO  
 NS 22968  
 DS 4  
 SWH 28846.154 Hz  
 FIDRES 0.880315 Hz  
 AQ 1.1359574 sec  
 RG 203  
 DW 17.333 usec  
 DE 6.50 usec  
 TE 320.0 K  
 D1 2.00000000 sec  
 D11 0.03000000 sec  
 TD0 25  
 SFO1 125.7697337 MHz  
 NUC1 13C  
 P0 3.40 usec  
 P1 10.20 usec  
 PLW1 88.91999817 W  
 SFO2 500.1320005 MHz  
 NUC2 1H  
 CPDPRG2 waltz16  
 PCPD2 20.00 usec  
 PLW2 15.48799982 W  
 PLW12 0.34847999 W  
 PLW13 0.17528000 W

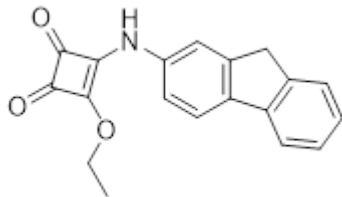

9

<sup>13</sup>C NMR (125 MHz, DMSO-d<sub>6</sub>)

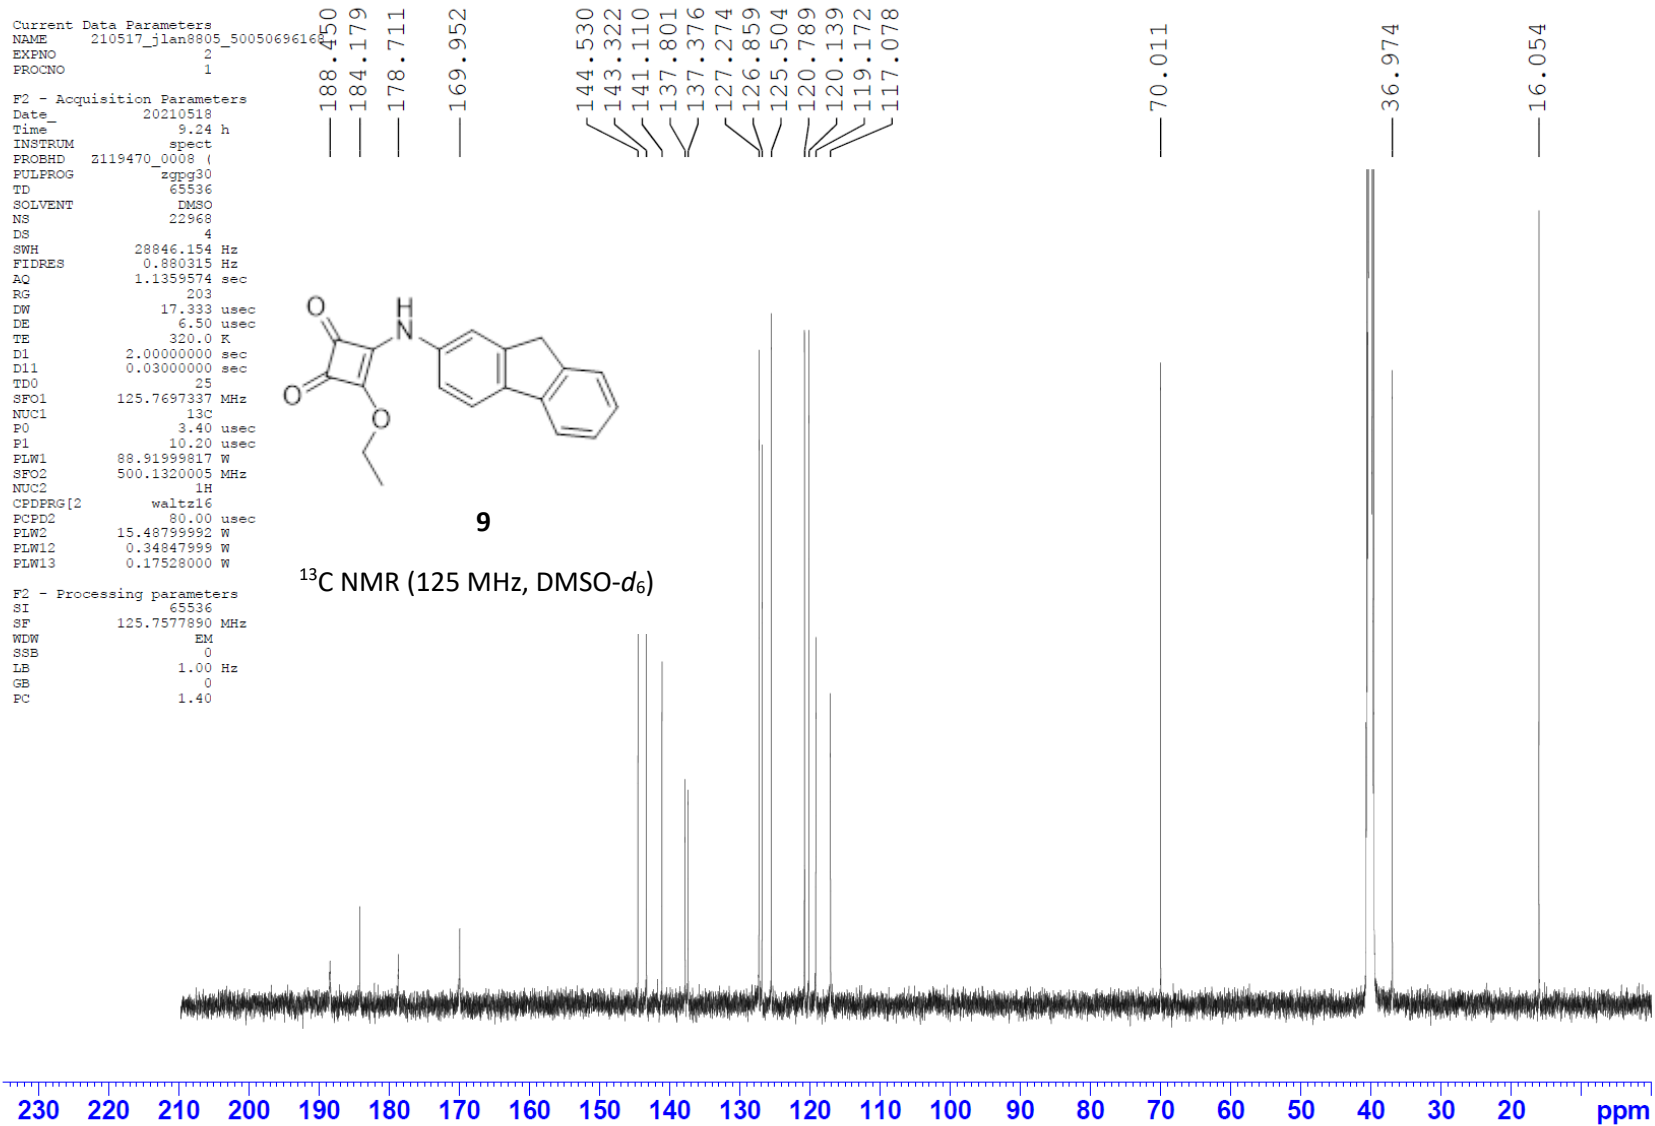

```

Current Data Parameters
NAME      21050411
EXPNO    11
PROCNO   11
F2 - Acquisition Parameters
Date_    20210504
Time     21.21 h
INSTRUM  spect
PROBHD   Z44896_0030 (C
PULPROG  zg30
TD       163840
SOLVENT  DMSO
NS       8
DS       0
SWH      8403.361 Hz
FIDRES   0.102580 Hz
AQ       9.7484798 sec
RG       15.44
DW       59.500 usec
DE       17.30 usec
TE       298.1 K
D1       5.000000000 sec
TD0      1
SFO1     600.1339008 MHz
NUC1     1H
PO       2.83 usec
P1       8.50 usec
PLW1     6.18020010 W
F2 - Processing parameters
SI       262144
SF       600.1300153 MHz
WDW      EM
SSB      0
LB       0 Hz
GB       0
PC       1.00

```

8.335  
8.319  
8.302  
8.291  
8.290  
8.277  
8.241  
8.225  
8.160  
8.158  
8.093  
8.080  
8.067  
7.914  
7.900

4.686  
4.684  
4.683  
4.673

1.325  
1.325  
1.310  
1.300

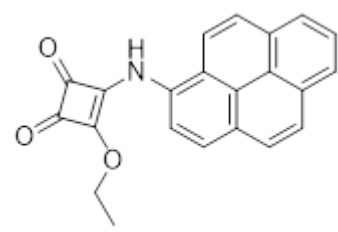

10

<sup>1</sup>H NMR (600 MHz, DMSO-d<sub>6</sub>)

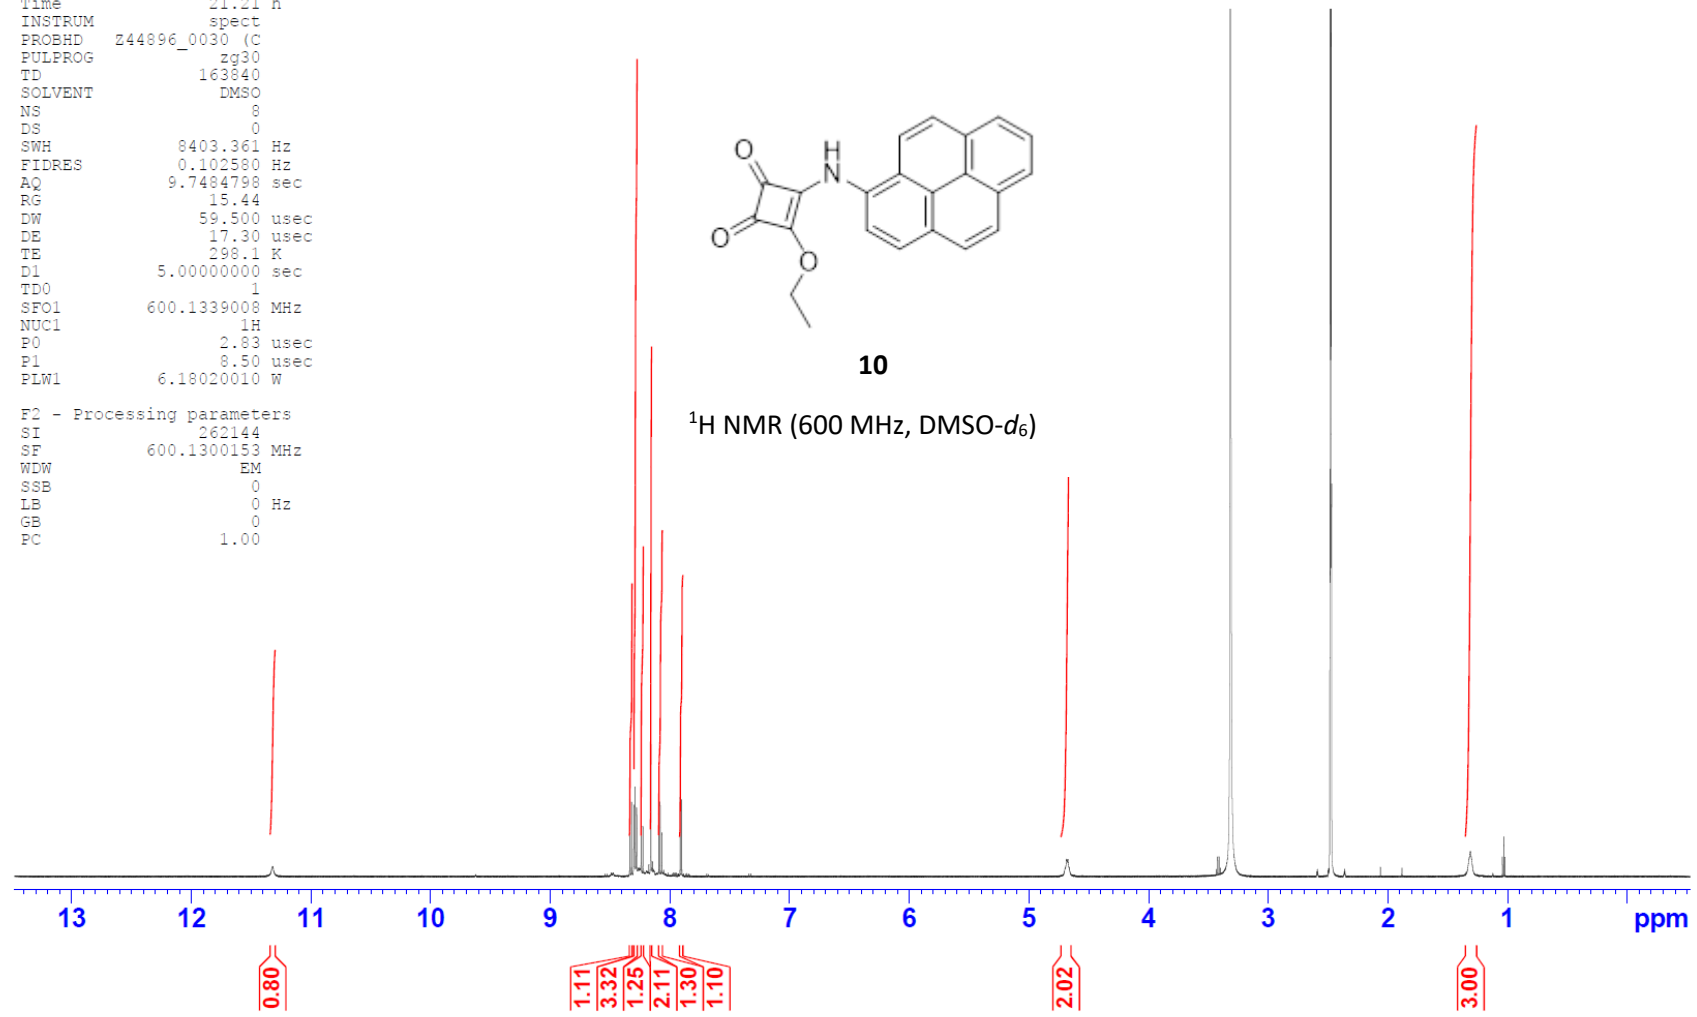

```

Current Data Parameters
NAME      210504_JL
EXPNO     6
PROCNO    1

F2 - Acquisition Parameters
Date_     20210504
Time      23.24 h
INSTRUM   spect
PROBHD    Z44896_0030 (C
PULPROG   zgdc
TD         133328
SOLVENT   DMSO
NS         1800
DS         0
SWH        33333.332 Hz
FIDRES     0.500020 Hz
AQ         1.9999200 sec
RG         2050
DW         15.000 usec
DE         18.00 usec
TE         298.0 K
D1         2.00000000 sec
D11        0.03000000 sec
TD0        1
SFO1       150.9194083 MHz
NUC1       13C
F1         16.00 usec
PLW1       151.00999451 W
SFO2       600.1328460 MHz
NUC2       1H
CPDPRG[2] waltz16
PCPD2      70.00 usec
PLW2       6.18020010 W
PLW12      0.09112600 W

F2 - Processing parameters
SI         16384
SF         150.9028090 MHz
WDW        EM
SSB        0
LB         0.10 Hz
GB         0
PC         1.40

```

192.120  
 184.984  
 179.934  
 171.743  
 131.809  
 131.348  
 131.096  
 130.916  
 130.083  
 129.275  
 129.092  
 128.032  
 127.641  
 127.453  
 127.128  
 125.943  
 125.646  
 125.336  
 124.656  
 124.163  
 124.135  
 123.058  
 122.849  
 122.626

69.748

16.076

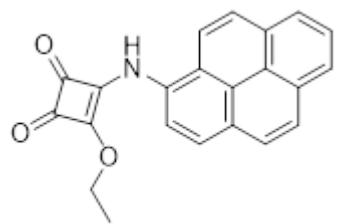

**10**

<sup>13</sup>C NMR (150 MHz, DMSO-d<sub>6</sub>)

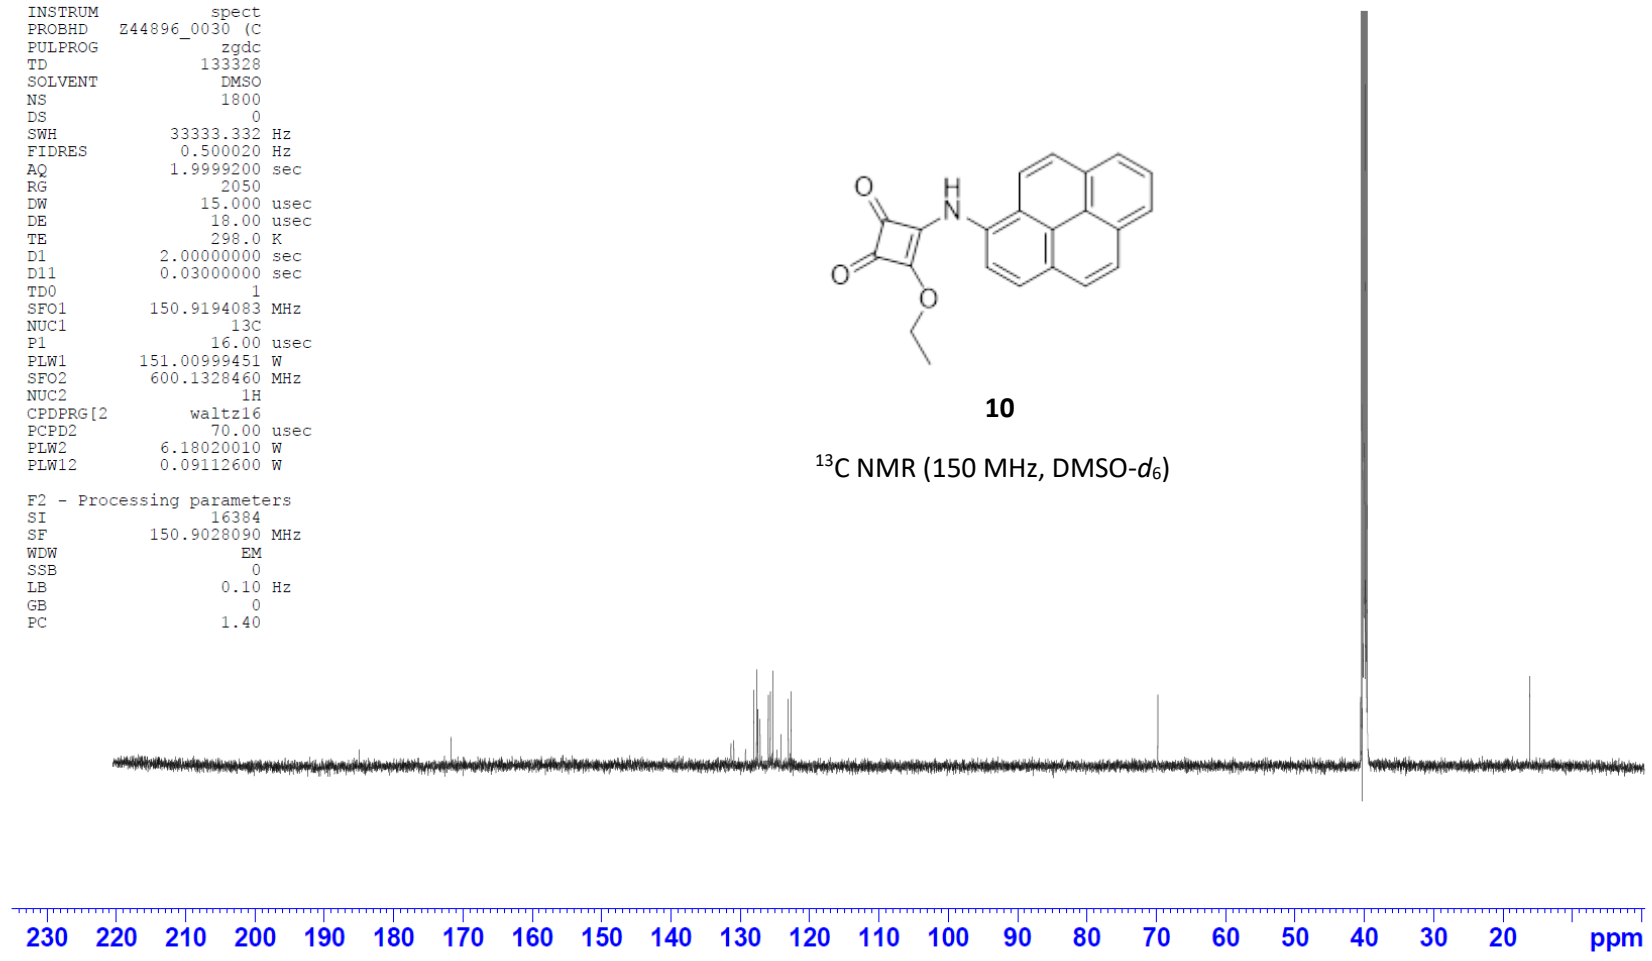

# HRMS characterisation

D:\Nick Proschogo\20200803\_Velos\_SqFIBu  
MeOH

3/08/2020 2:39:29 PM

20200803\_Velos\_SqFIBu

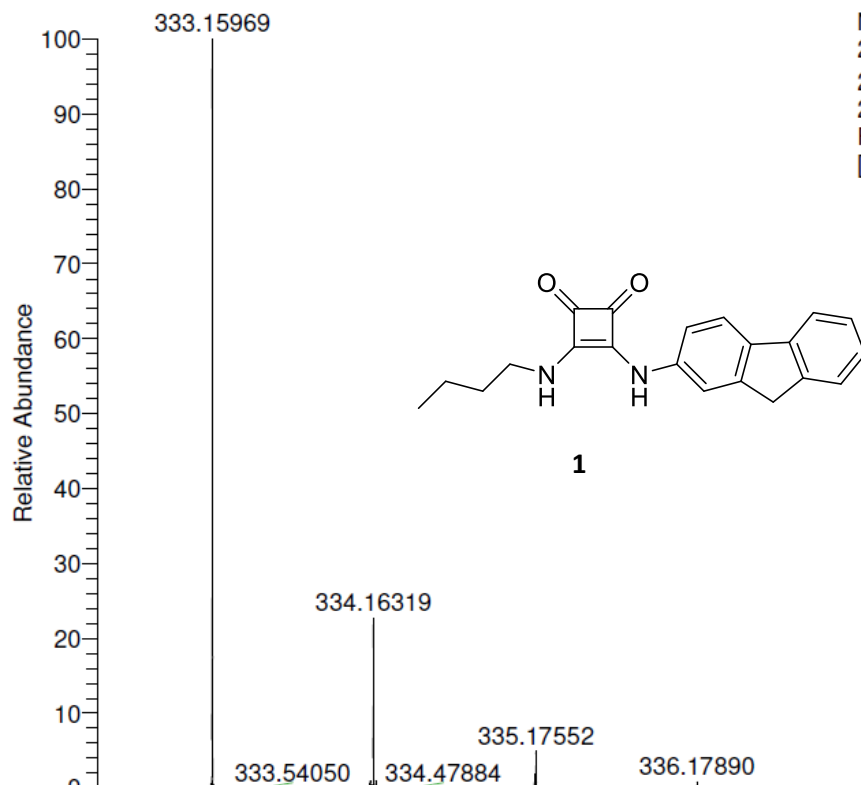

NL:  
2.82E6  
20200803\_Velos\_SqFIBu#14-  
21 RT: 0.76-1.16 AV: 8 T:  
FTMS + p ESI Full ms  
[100.00-2000.00]

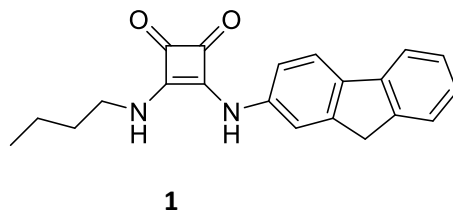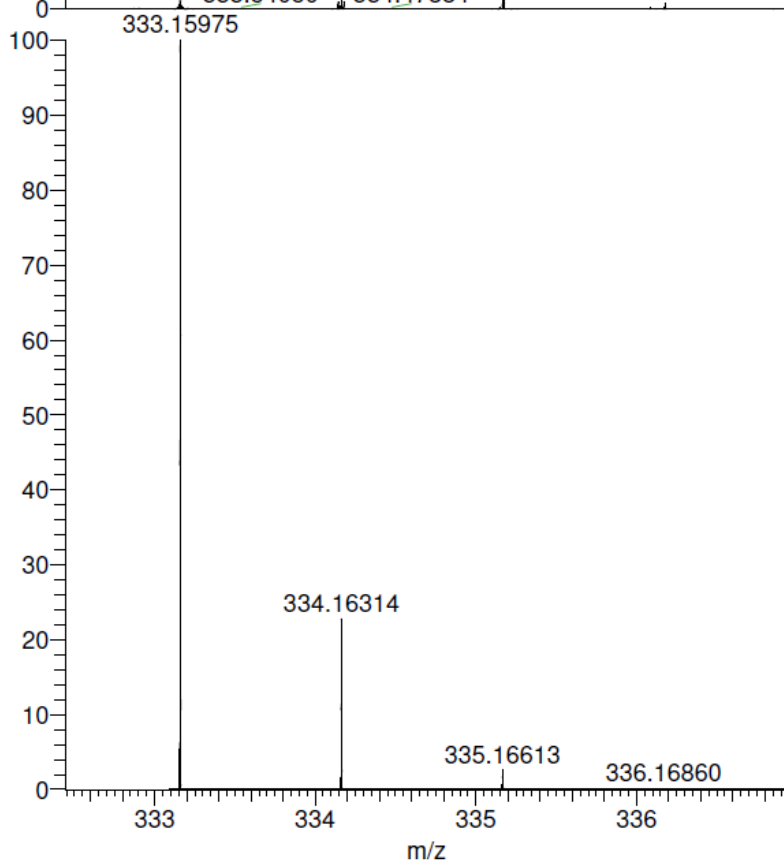

NL:  
1.84E4  
C<sub>21</sub> H<sub>20</sub> N<sub>2</sub> O<sub>2</sub> +H:  
C<sub>21</sub> H<sub>21</sub> N<sub>2</sub> O<sub>2</sub>  
p (gss, s /p:40) Chrg 1  
R: 104652 Res .Pwr . @FWHM

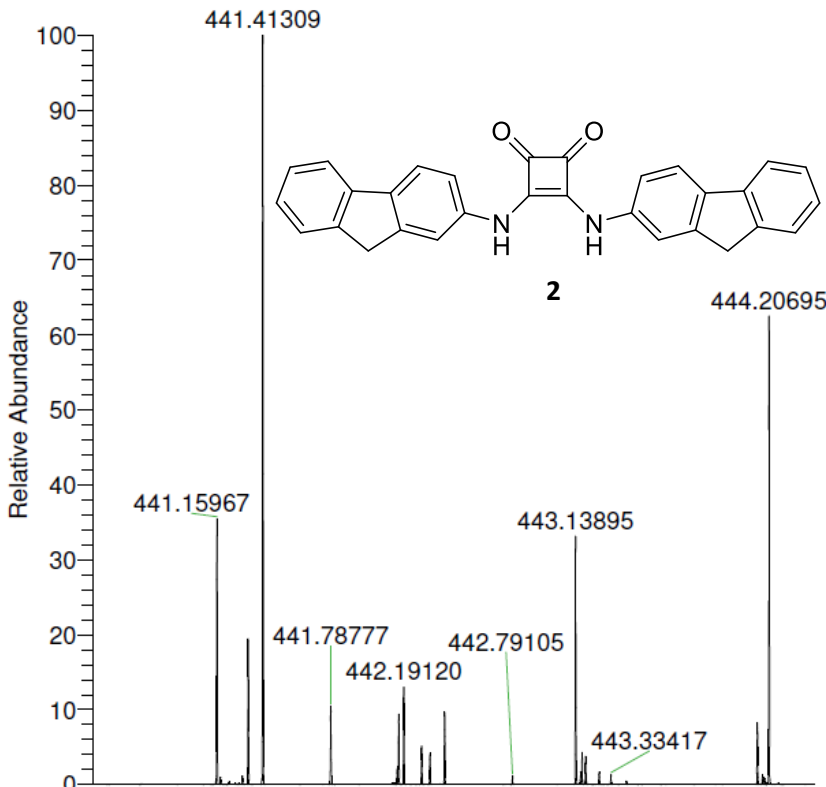

NL:  
7.19E5  
20200803\_Velos\_SqFI2#1-18  
RT: 0.03-1.00 AV: 18 T: FTMS  
+ p ESI Full ms  
[100.00-2000.00]

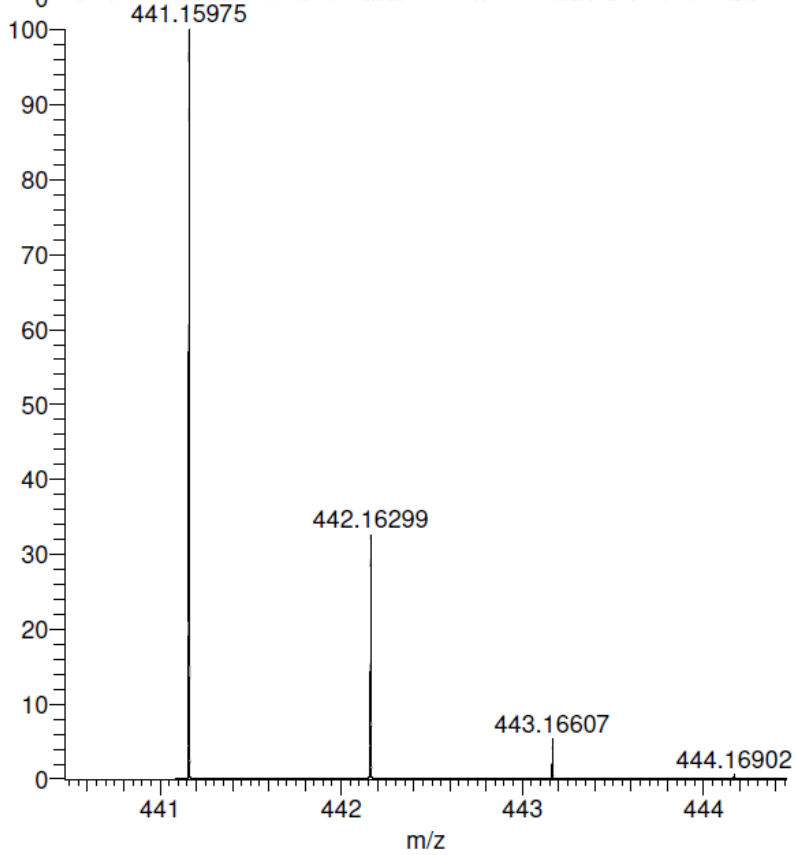

NL:  
1.67E4  
C<sub>30</sub> H<sub>20</sub> N<sub>2</sub> O<sub>2</sub> +H:  
C<sub>30</sub> H<sub>21</sub> N<sub>2</sub> O<sub>2</sub>  
p (gss, s /p:40) Chrg 1  
R: 104652 Res .Pwr . @FWHM

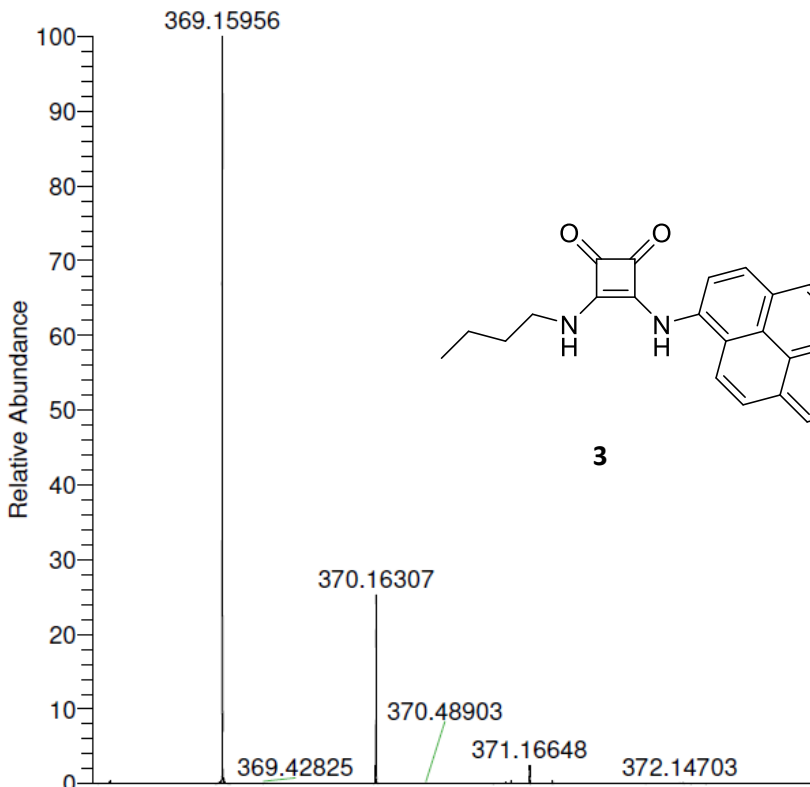

NL:  
9.14E5  
20200803\_Velos\_SqPyBu#13-  
19 RT: 0.73-1.09 AV: 7 T:  
FTMS + p ESI Full ms  
[150.00-2000.00]

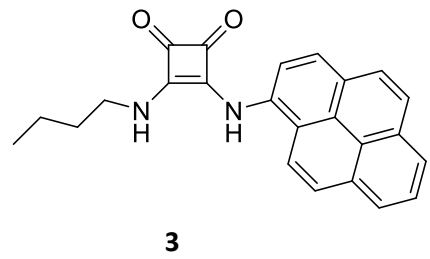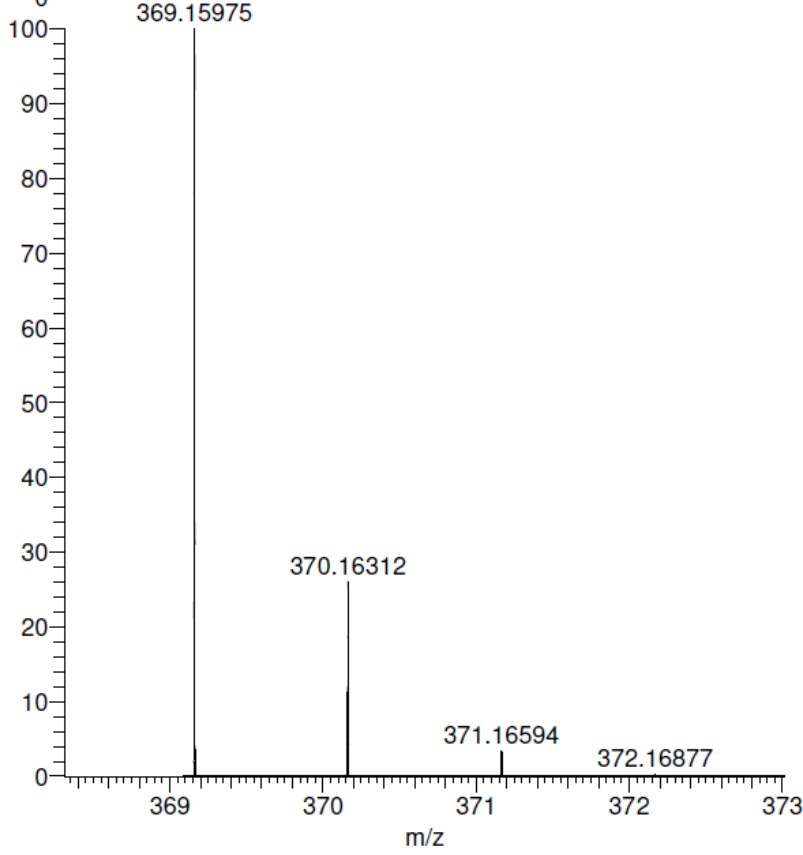

NL:  
1.79E4  
C<sub>24</sub> H<sub>20</sub> N<sub>2</sub> O<sub>2</sub> +H:  
C<sub>24</sub> H<sub>21</sub> N<sub>2</sub> O<sub>2</sub>  
p (gss, s /p:40) Chrg 1  
R: 104652 Res .Pwr . @FWHM

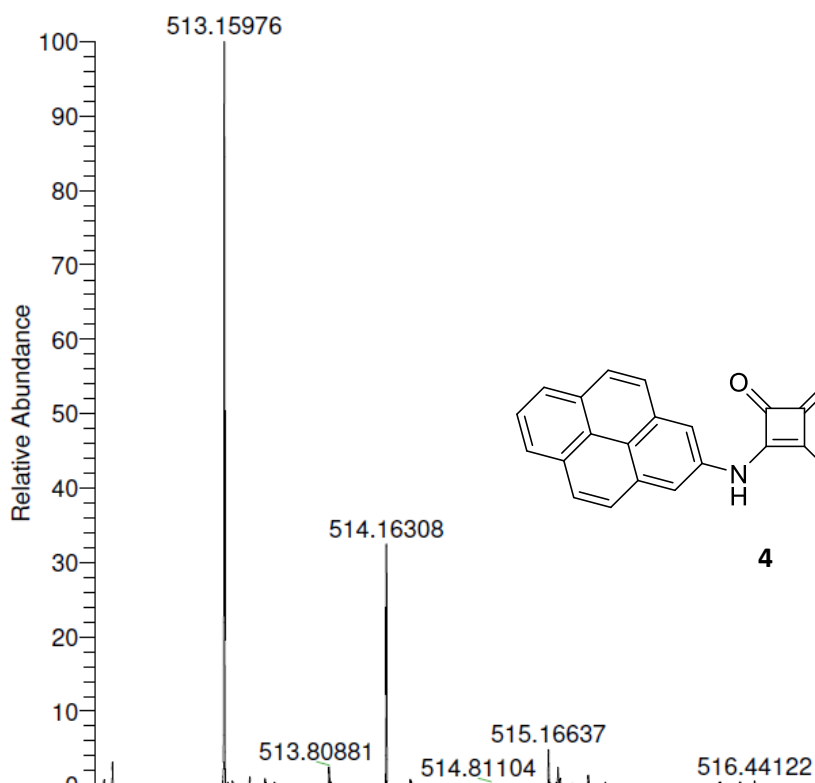

NL:  
1.02E5  
20200803\_Velos\_SqPy2#5-18  
RT: 0.25-0.98 AV: 14 T: FTMS  
+ p ESI Full ms  
[400.00-2000.00]

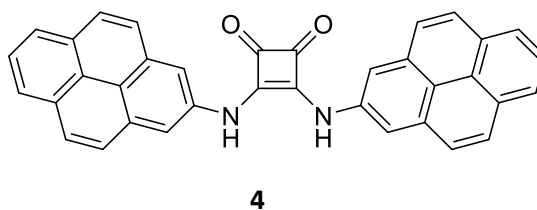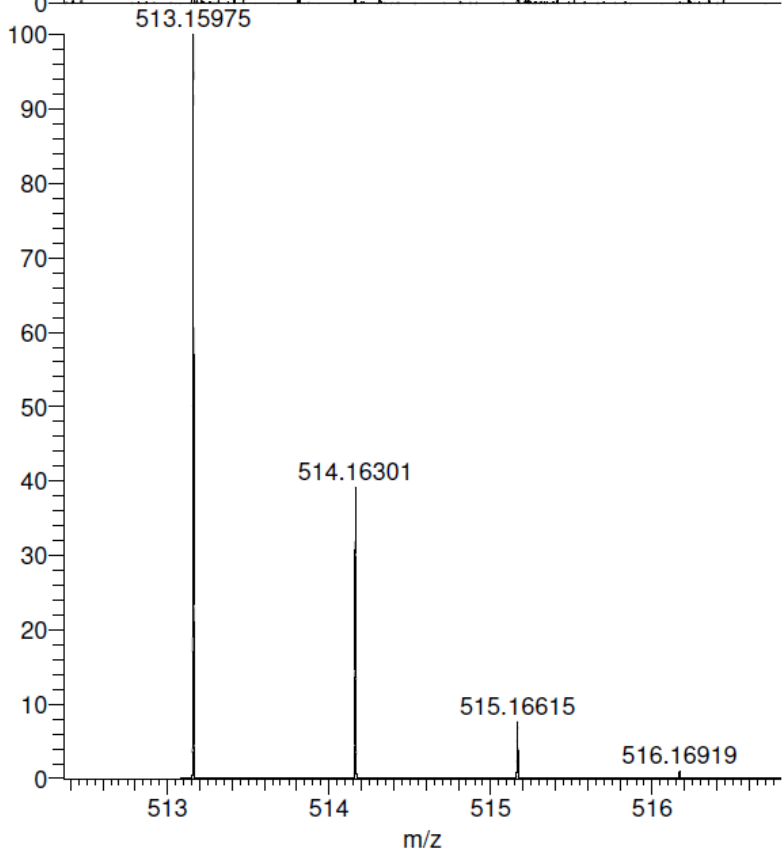

NL:  
1.57E4  
C<sub>36</sub> H<sub>20</sub> N<sub>2</sub> O<sub>2</sub> +H:  
C<sub>36</sub> H<sub>21</sub> N<sub>2</sub> O<sub>2</sub>  
p (gss, s /p:40) Chrg 1  
R: 104652 Res .Pwr . @FWHM

# Generic Display Report

## Analysis Info

Analysis Name D:\OneDrive - The University of Sydney (Staff)\Instrument\_Data\BrukerSolarix2XR\Data\MS Facility\Jakob Lane\20210607\20210607\_JL\_HR\_\_000008.d  
Method 20210607 ESI Pos Neg 150-3000\_AMP\_2M  
Sample Name SqCh2NapBu  
Comment

Acquisition Date 6/7/2021 5:35:32 PM

Operator Admin  
Instrument solariX 2xR

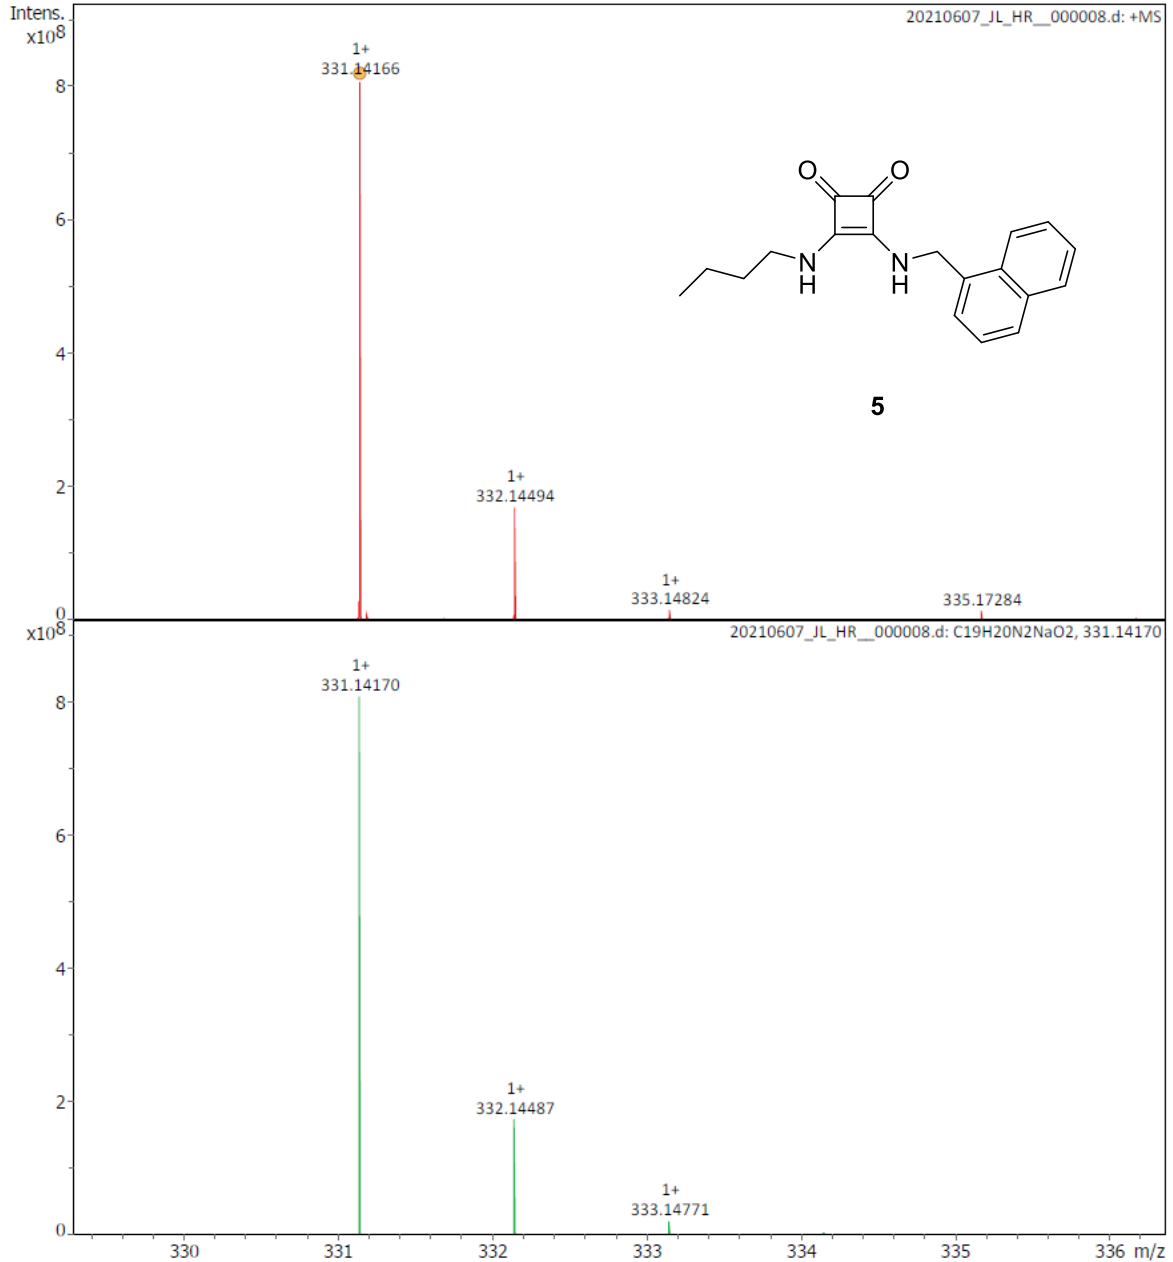



# Generic Display Report

## Analysis Info

Analysis Name D:\OneDrive - The University of Sydney (Staff)\Instrument\_Data\BrukerSolarix2XR\Data\MS Facility\Jakob Lane\20210607\20210607\_JL\_HR\_\_000010.d  
Method 20210607 ESI Pos Neg 150-3000\_AMP\_2M  
Sample Name SqCh2Nap2  
Comment

Acquisition Date 6/7/2021 5:48:55 PM

Operator Admin  
Instrument solariX 2xR

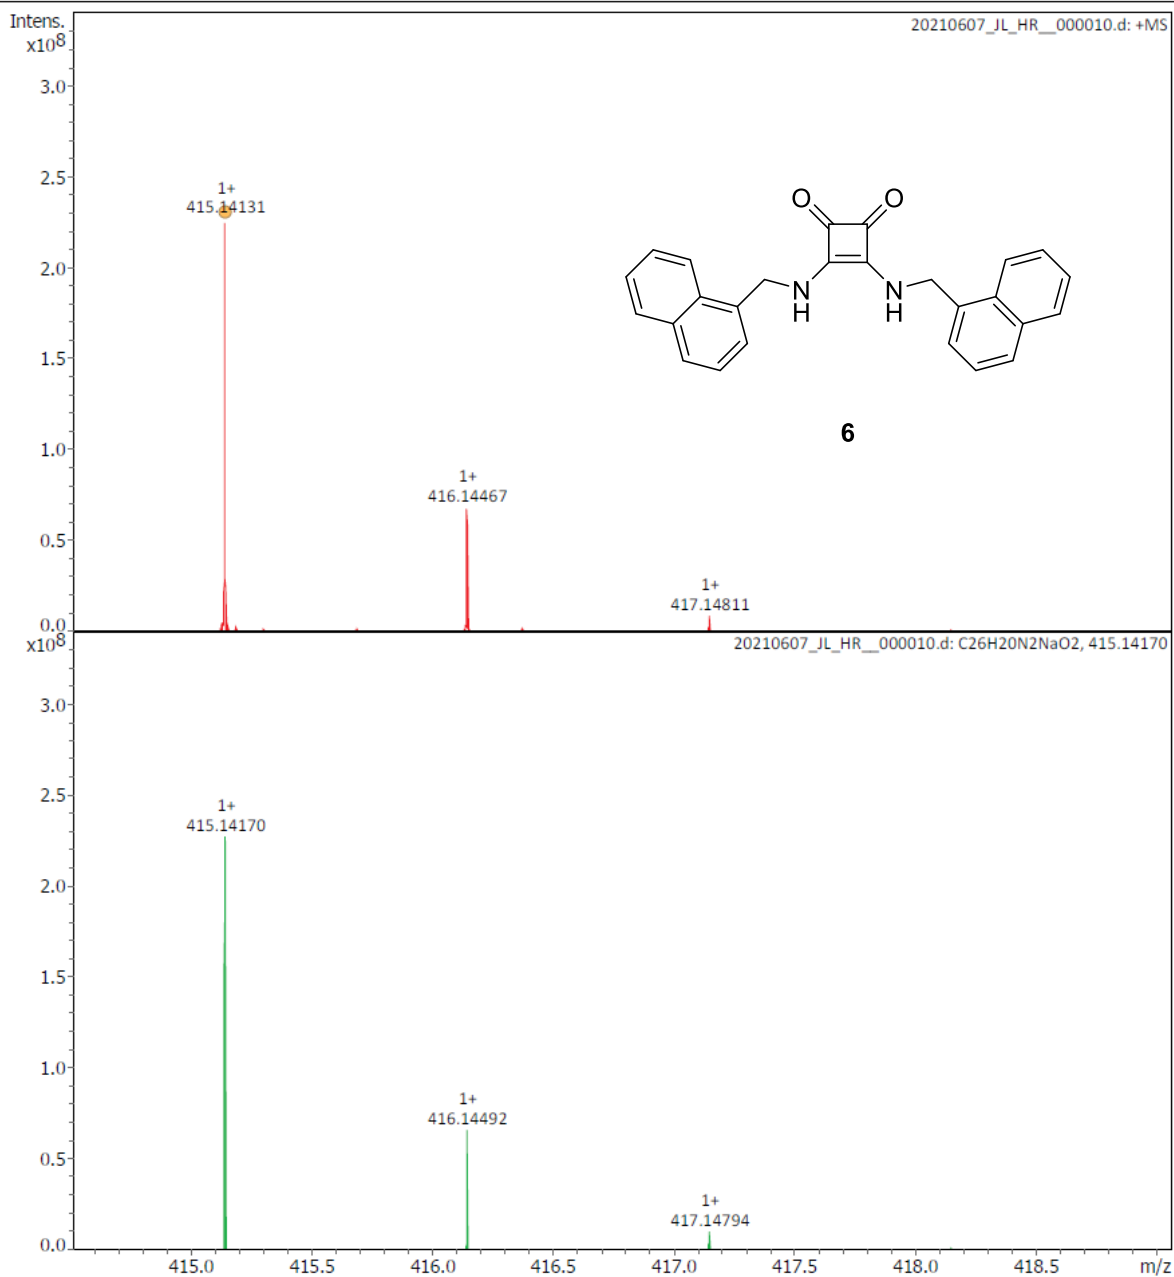

# Generic Display Report

## Analysis Info

Analysis Name D:\OneDrive - The University of Sydney (Staff)\Instrument\_Data\BrukerSolarix2XR\Data\MS Facility\Jakob Lane\20210607\20210607\_JL\_HR\_\_000009.d  
Method 20210607 ESI Pos Neg 150-3000\_AMP\_2M  
Sample Name SqCh2PyBu  
Comment

Acquisition Date 6/7/2021 5:40:43 PM

Operator Admin  
Instrument solariX 2xR

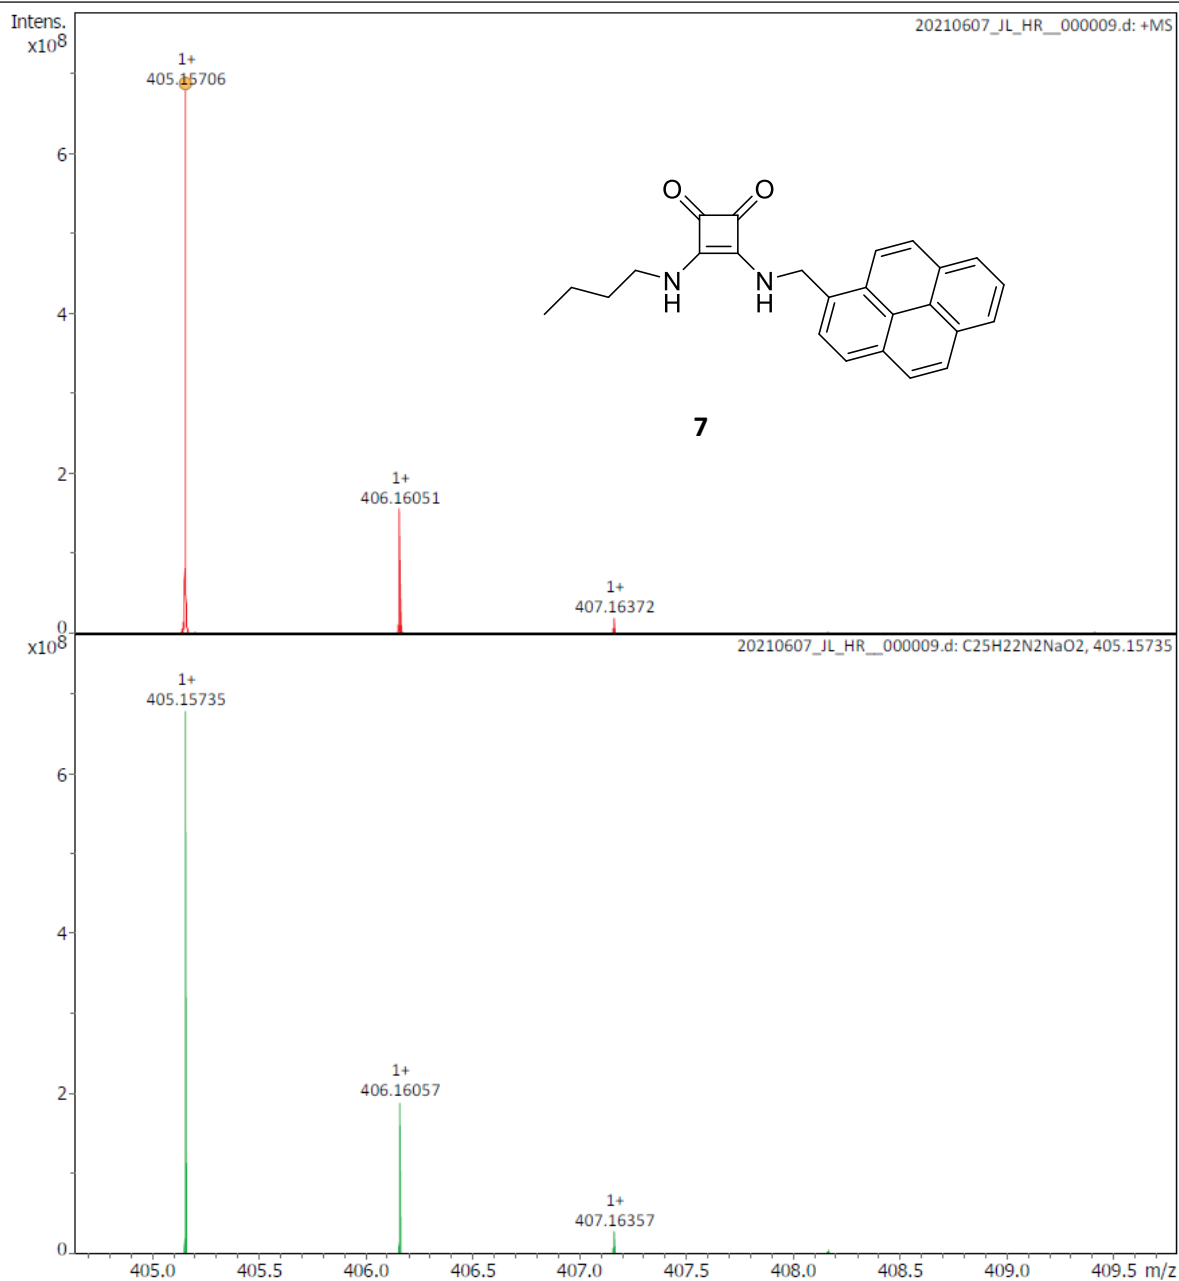

# Generic Display Report

## Analysis Info

Analysis Name D:\OneDrive - The University of Sydney (Staff)\Instrument\_Data\BrukerSolarix2XR\Data\MS Facility\Jakob Lane\20210607\20210607\_JL\_HR\_000007.d  
Method 20210607 ESI Pos Neg 150-3000\_AMP\_2M  
Sample Name SqCh2Py2  
Comment

Acquisition Date 6/7/2021 5:30:31 PM

Operator Admin  
Instrument solariX 2xR

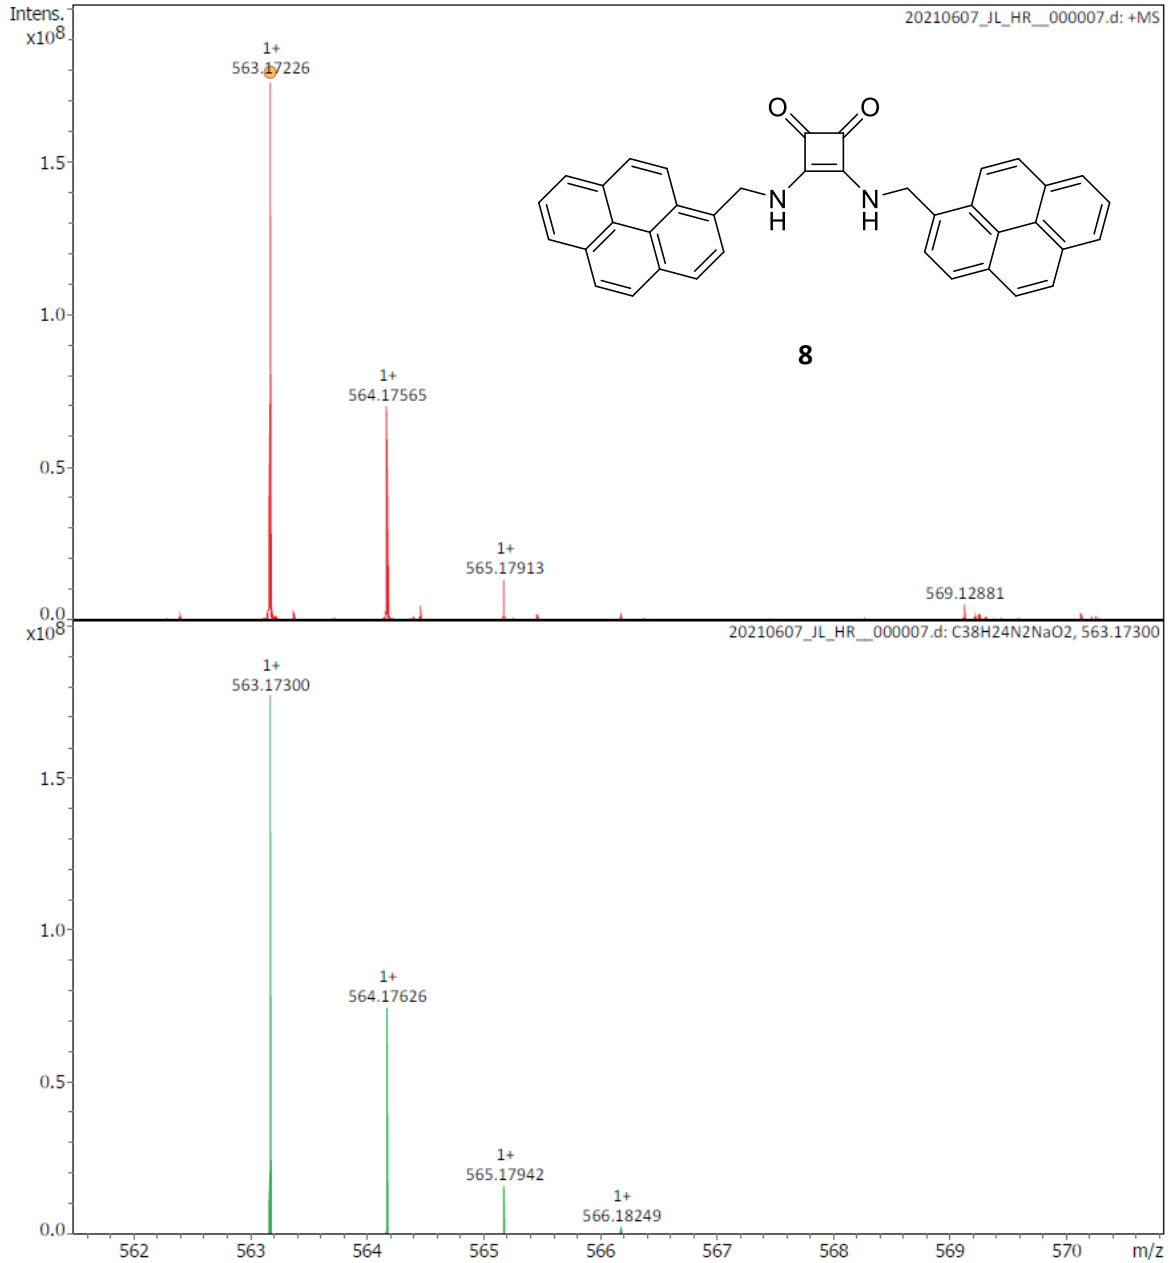

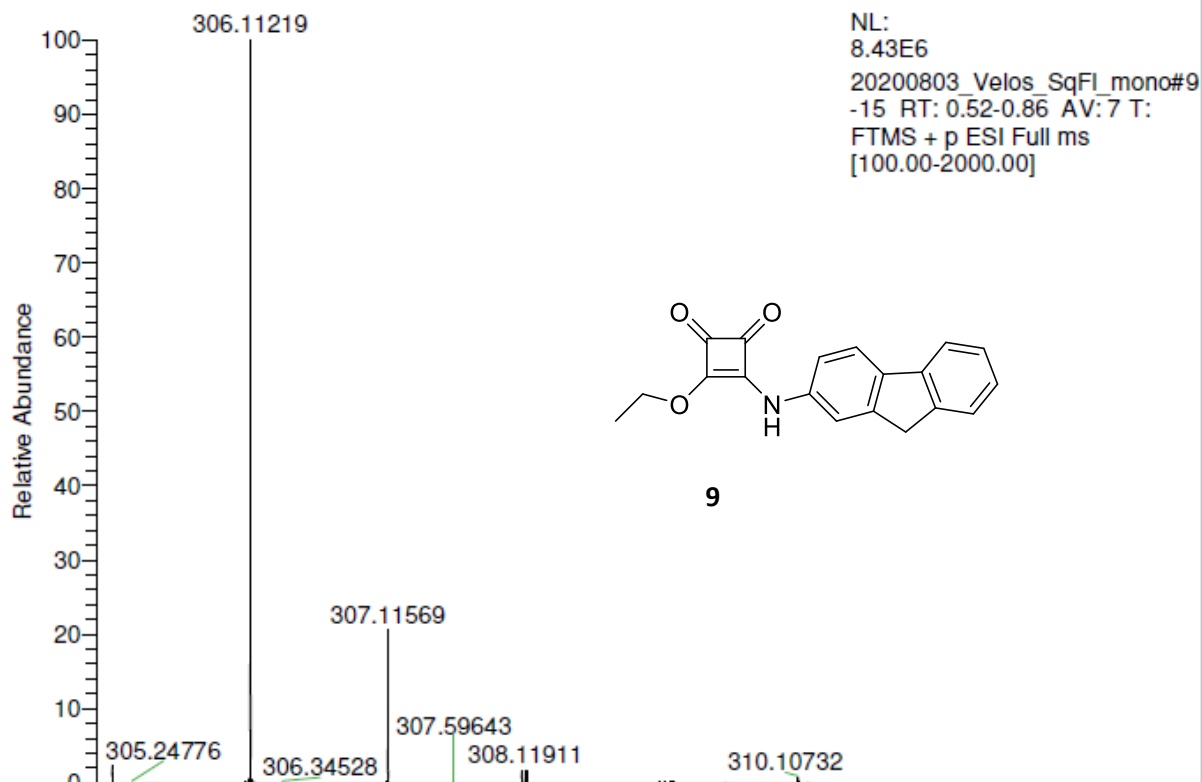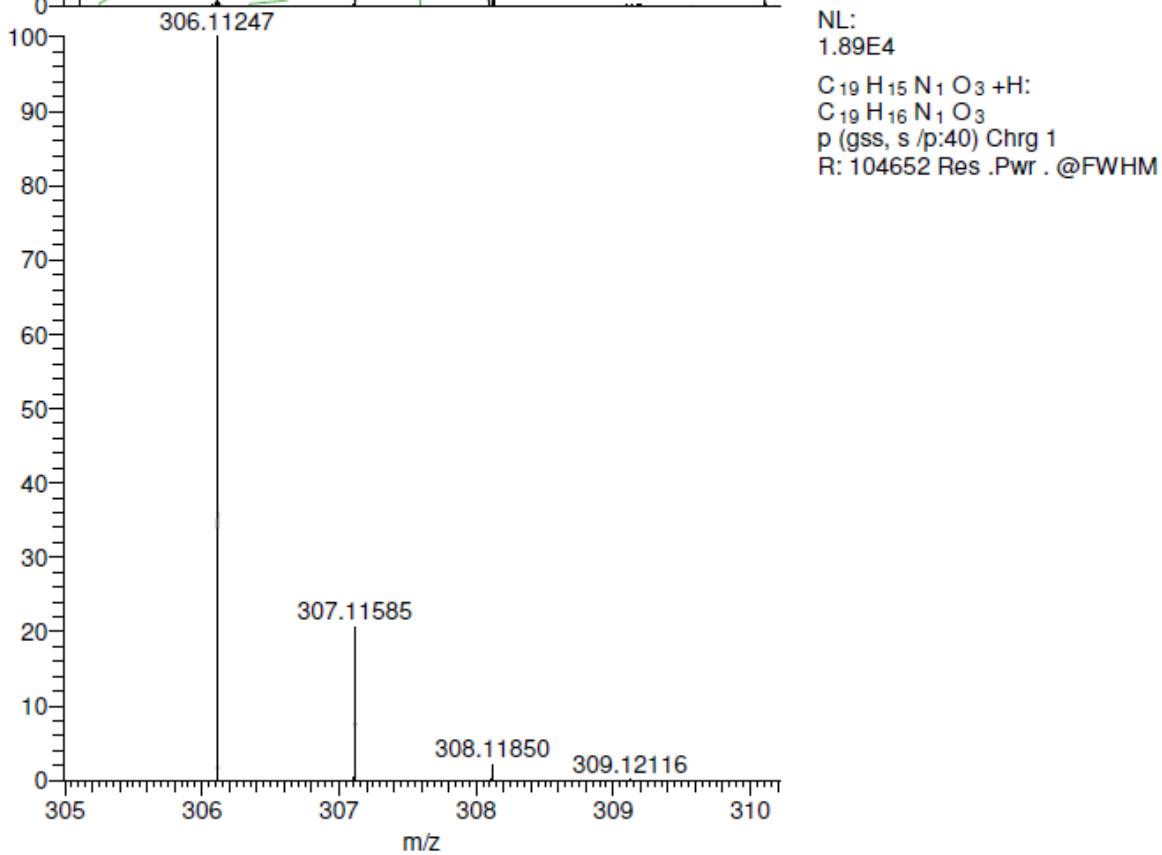

# Generic Display Report

## Analysis Info

Analysis Name D:\OneDrive - The University of Sydney (Staff)\Instrument\_Data\BrukerSolarix2XR\Data\MS Facility\Jakob Lane\20210607\20210607\_JL\_HR\_000011.d  
Method 20210607 ESI Pos Neg 150-3000\_AMP\_2M  
Sample Name SqPymono  
Comment

Acquisition Date 6/7/2021 5:54:07 PM

Operator Admin  
Instrument solarix 2xr

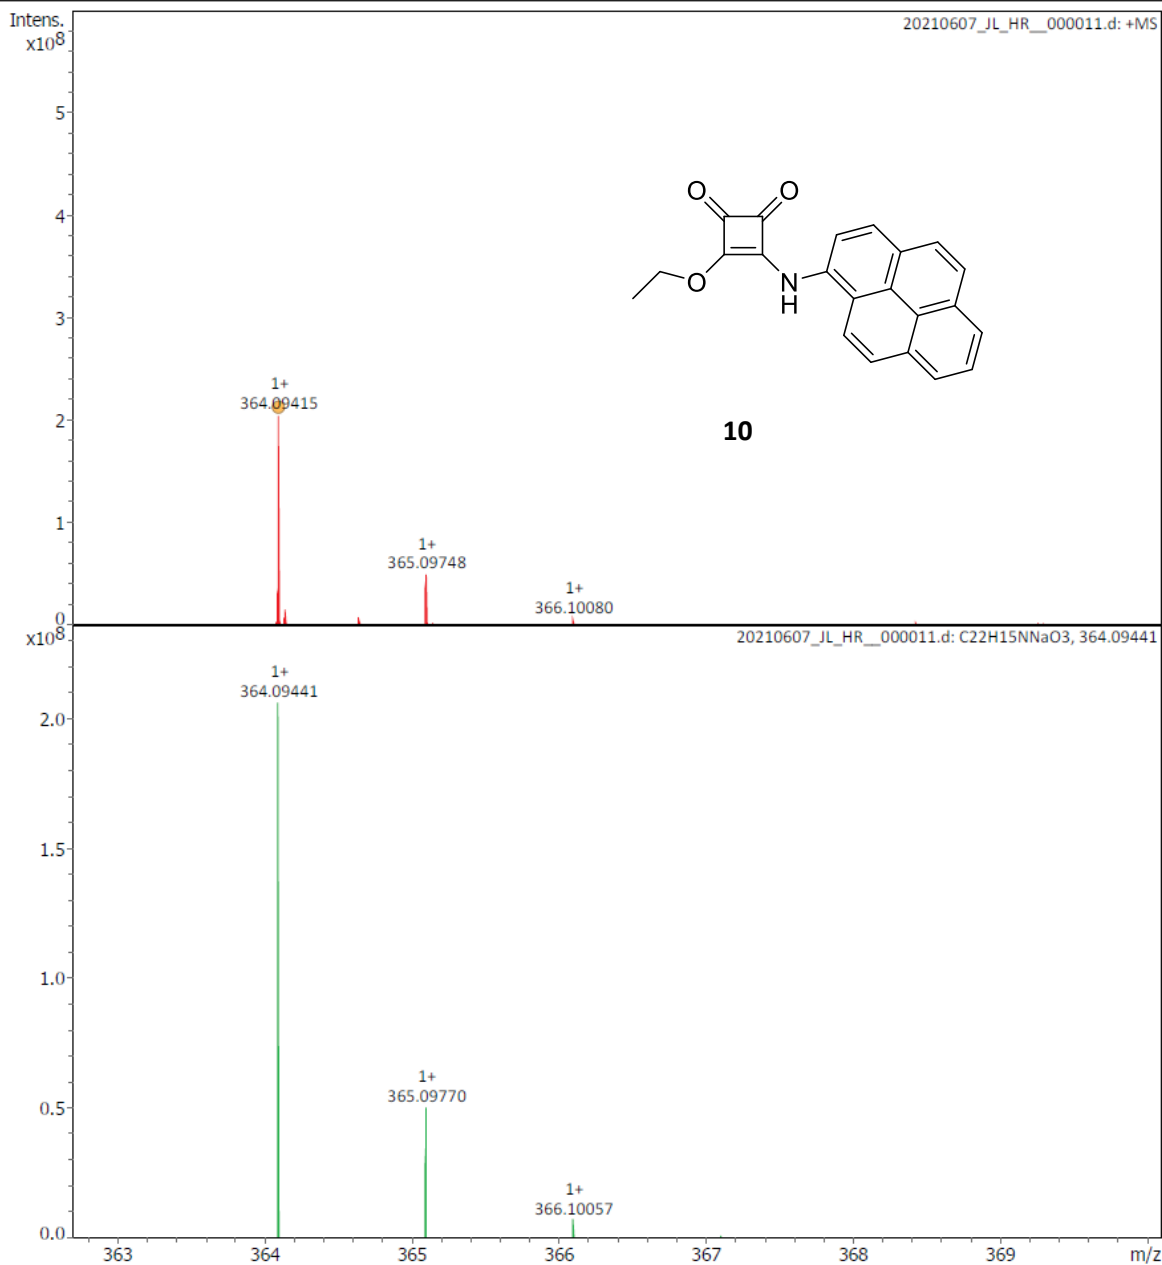

**pK<sub>a</sub> titration data**

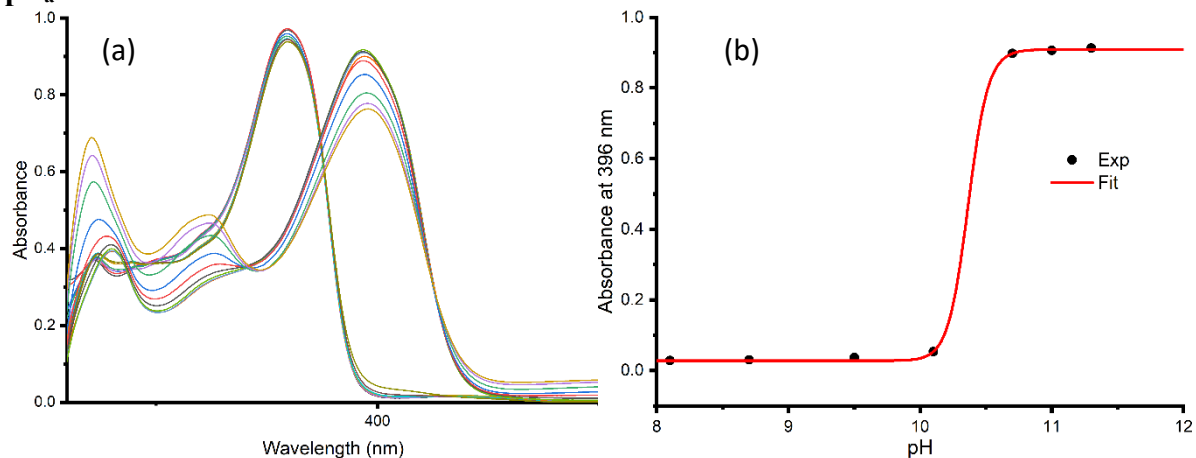

**Figure S1:** (a) pK<sub>a</sub> spectrophotometric titration of **1** in DMSO (10% water) and (b) absorbance at 395 nm for **1** as a function of pH, fitted to a Boltzmann S curve

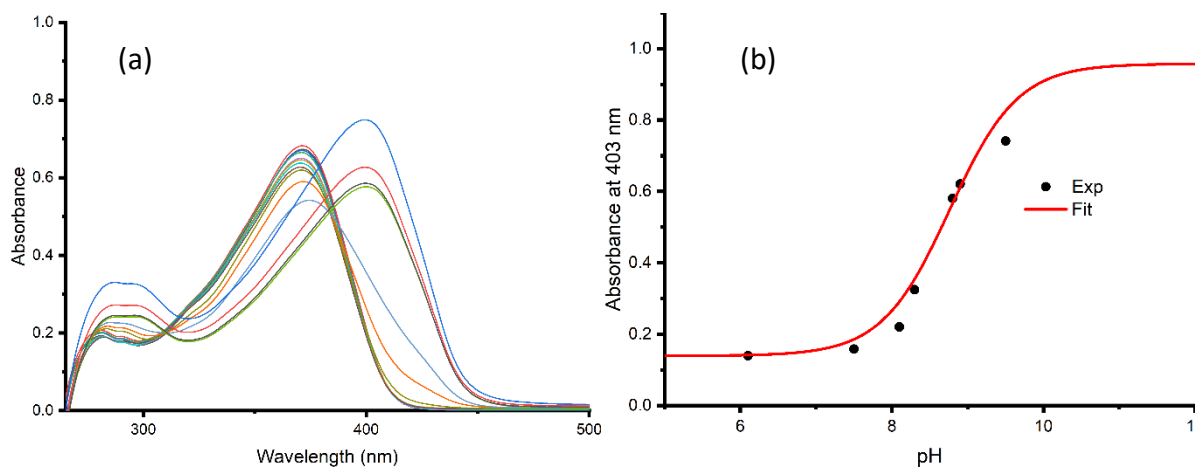

**Figure S2:** pK<sub>a</sub> spectrophotometric titration of **2** in DMSO (10% water) and (b) absorbance at 403 nm for **2** as a function of pH, fitted to a Boltzmann S curve

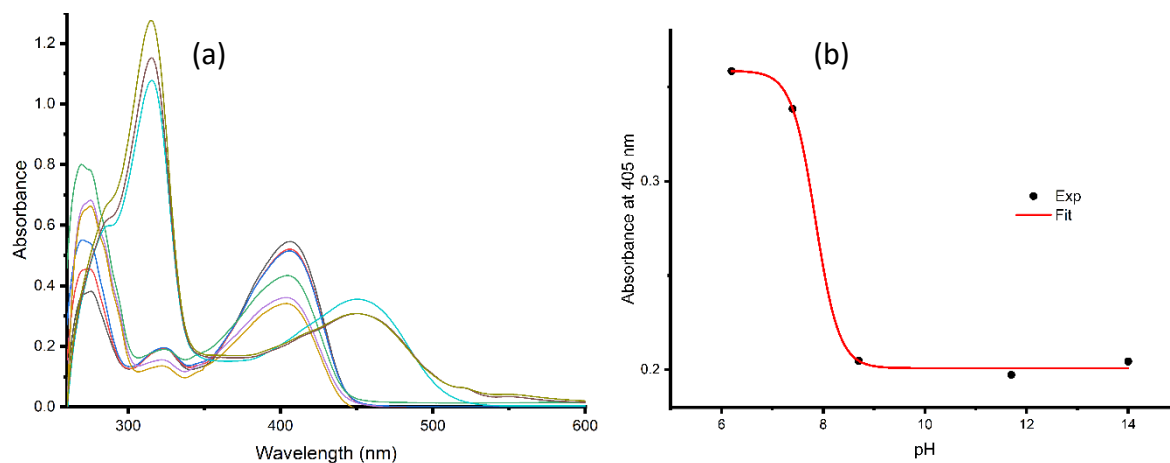

**Figure S3:**  $pK_a$  spectrophotometric titration of **3** in DMSO (10% water) and (b) absorbance at 405 nm for **3** as a function of pH, fitted to a Boltzmann S curve

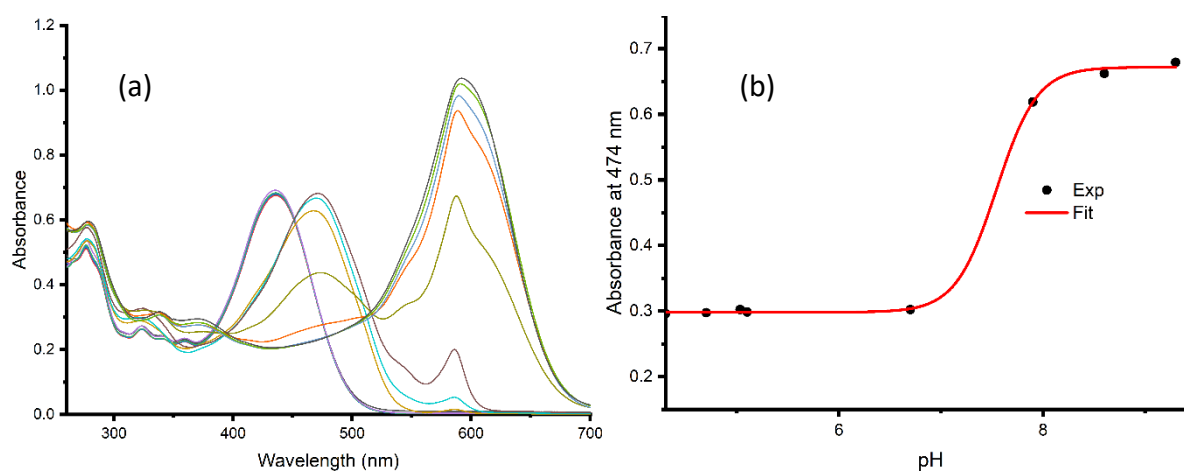

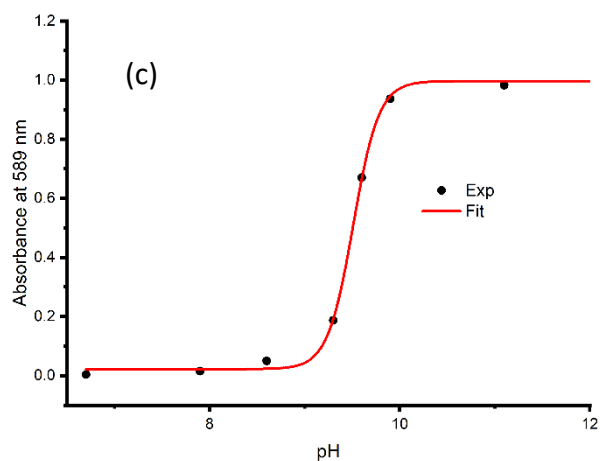

**Figure S4:**  $pK_a$  spectrophotometric titration of **4** in DMSO (10% water), and absorbance at (b) 474 nm and (c) 589 nm for **4** as a function of pH, fitted to a Boltzmann S curve.

#### Estimation of $pK_a$ by $^1\text{H}$ NMR spectroscopy

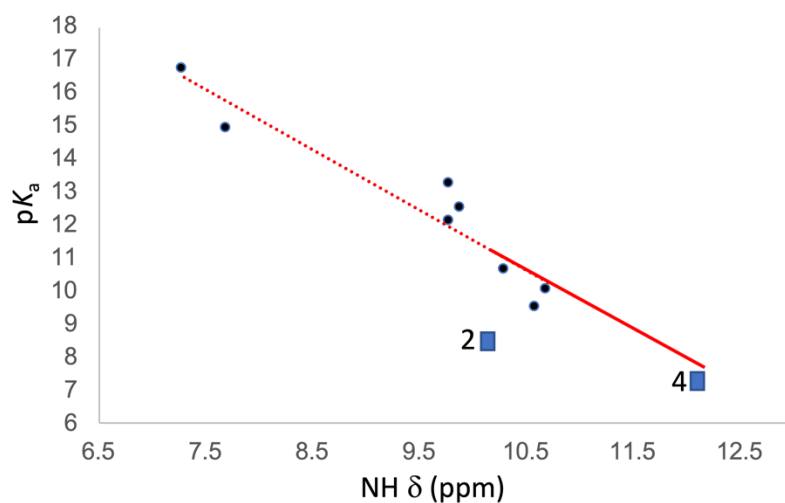

**Figure S5:** Plot of  $pK_a$  against chemical shift in the  $^1\text{H}$  NMR spectrum in  $\text{DMSO-}d_6$  for squaramide NH protons. Dotted line is the trendline for known compounds; solid line is extrapolated.



**Table S1:** Relationships between squaramide NH proton chemical shift in DMSO-*d*<sub>6</sub> and their p*K*<sub>a</sub> in DMSO

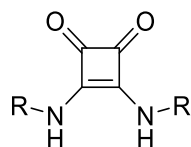

| Substituent (R)             | <sup>1</sup> H NMR NH proton chem. shift DMSO (ppm) | Experimental or calculated p <i>K</i> <sub>a</sub> (obtained from literature) | Predicted p <i>K</i> <sub>a</sub> based on chemical shift | Δ chemical shift (ppm) (Exp. – Pred. p <i>K</i> <sub>a</sub> ) |
|-----------------------------|-----------------------------------------------------|-------------------------------------------------------------------------------|-----------------------------------------------------------|----------------------------------------------------------------|
| Bu                          | 7.3                                                 | 16.7 <sup>a, b</sup>                                                          | 16.8                                                      | -0.1                                                           |
| Bn                          | 7.7                                                 | 14.9 <sup>b</sup>                                                             | 15.9                                                      | -1.0                                                           |
| 3,5-bis(tBu)Ph              | 9.8                                                 | 12.1 <sup>a</sup>                                                             | 12.1                                                      | +0.0                                                           |
| Ph                          | 9.9                                                 | 12.5 <sup>a, b</sup>                                                          | 12.0                                                      | +0.5                                                           |
| 4-tBu-Ph                    | 9.8                                                 | 13.2 <sup>b</sup>                                                             | 12.1                                                      | +1.1                                                           |
| PhCF <sub>3</sub>           | 10.3                                                | 10.6 <sup>b</sup>                                                             | 11.2                                                      | -0.6                                                           |
| PhNO <sub>2</sub>           | 10.7                                                | 10 <sup>b</sup>                                                               | 10.4                                                      | -0.4                                                           |
| 3,5-bis(CF <sub>3</sub> )Ph | 10.6                                                | 9.5 <sup>b</sup>                                                              | 10.5                                                      | -1.0                                                           |

<sup>a</sup>Experimentally derived,<sup>3-5</sup> <sup>b</sup>Computationally calculated, error estimated ±1 p*K*<sub>a</sub> unit<sup>6</sup>

### UV-vis titration data

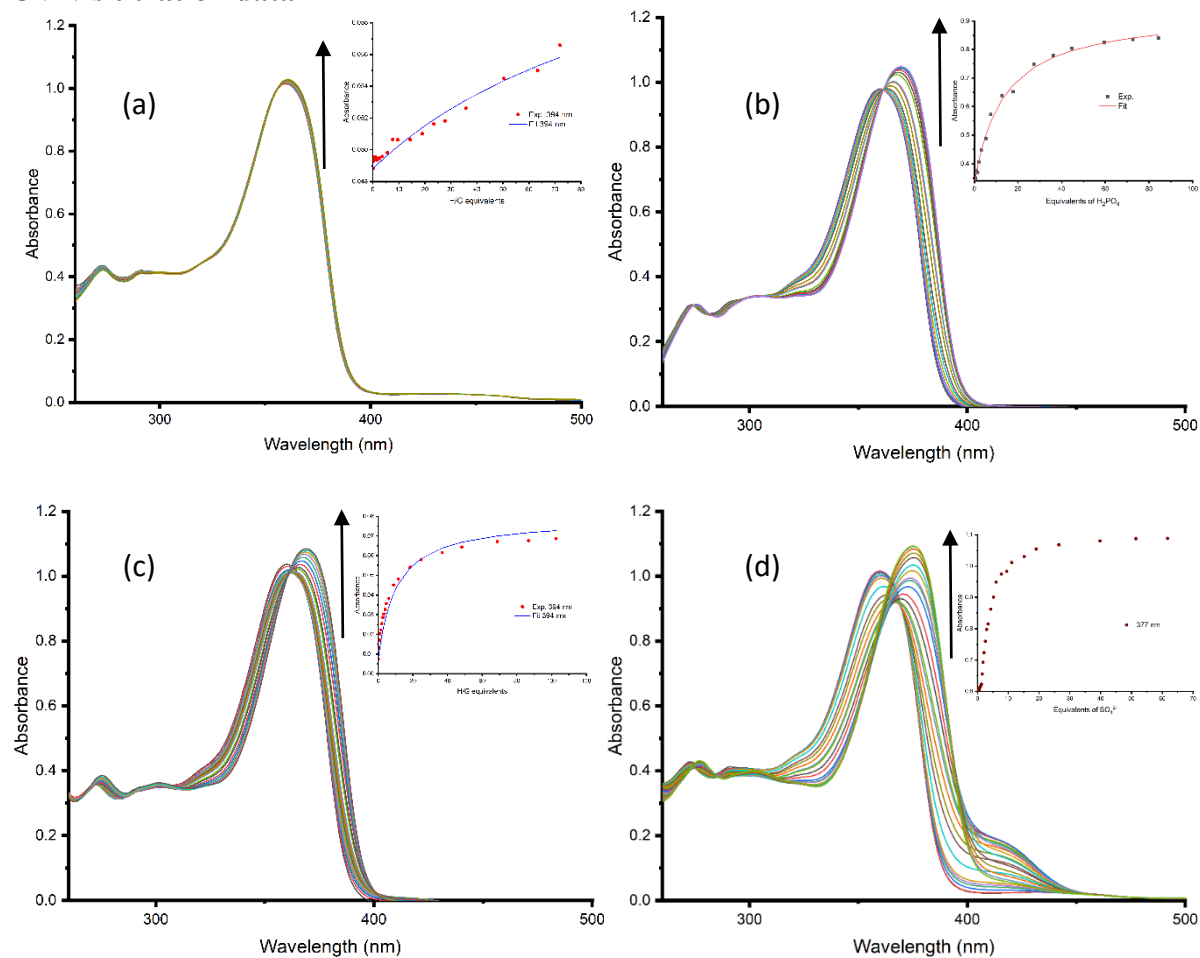

**Figure S6:** UV-Vis titration spectra of **1** (20  $\mu\text{M}$ ) with (a) TBACl, (b) TBAH<sub>2</sub>PO<sub>4</sub>, (c) TBAOAc and (d) TBA<sub>2</sub>SO<sub>4</sub>, 0 – 80 equivalents of anion in DMSO (1% water) at 298 K. Inset shows fitting of titration data to a 1:1 binding model where possible.

## Excitation – emission spectra for 1, 5 – 8 and reference amines 11 and 12

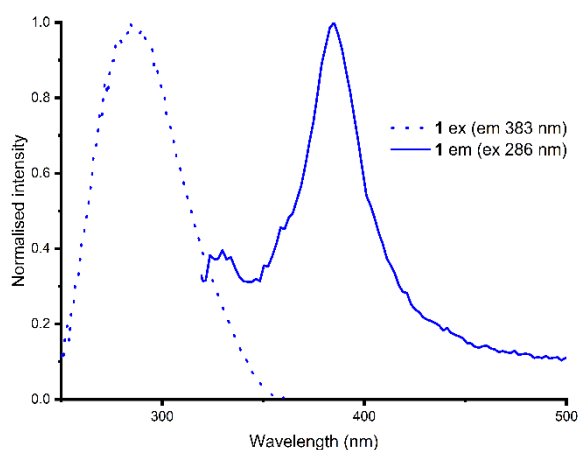

**Figure S7:** Excitation – emission spectra for compound **1** in DMSO (1% water)

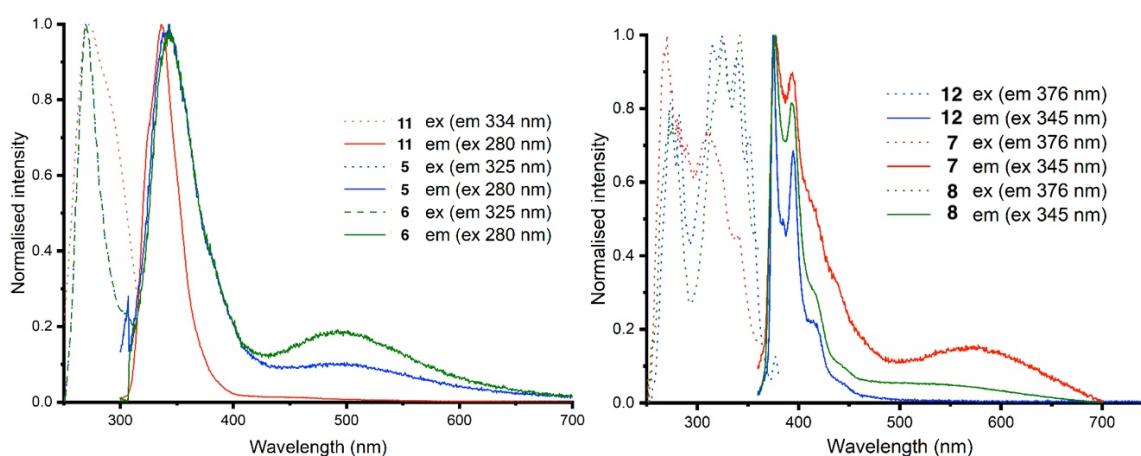

**Figure S8:** Excitation – emission spectra for (left): 2-naphthalenylmethylamine (**11**), **5** and **6** in DMSO (1% water); (right): 1-pyrenylmethylamine (**12**), **7** and **8** in DMSO (1% water).

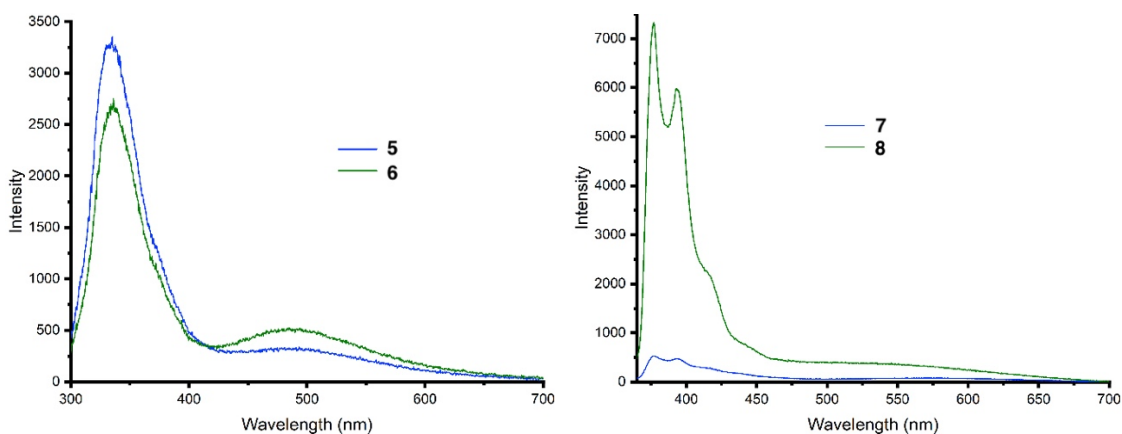

**Figure S9:** Emission spectra of compounds **5**, **6** (excitation 280 nm) and **7**, **8** (excitation 345 nm) in DMSO (1% water) at 25  $\mu\text{M}$ , illustrating the relatively low emission of **7**.

**Fluorescence dilution data**

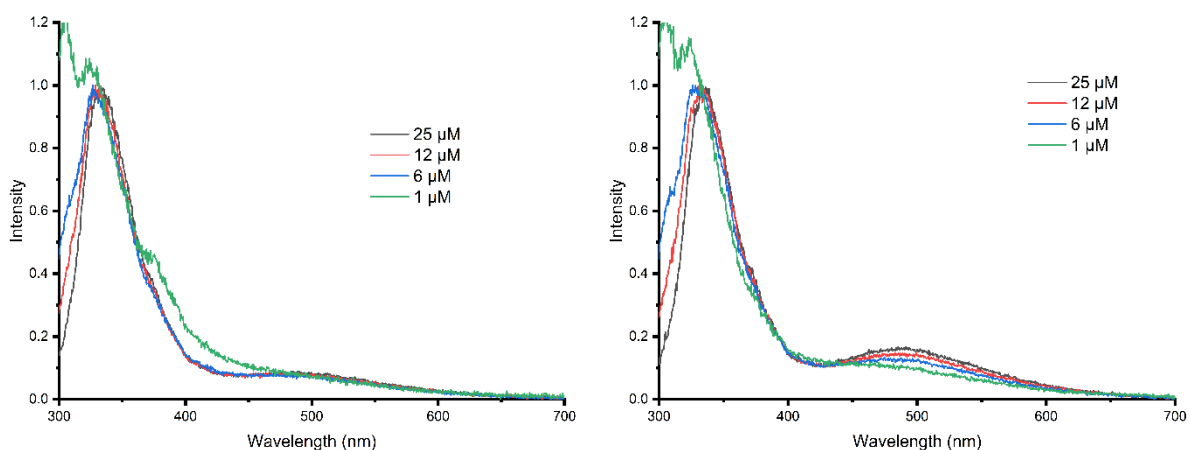

**Figure S10:** Normalised emission spectra collected of a) **5** and b) **6** at increasing dilution in DMSO (1% water) (excitation at 280 nm).

### Fluorescence titration data

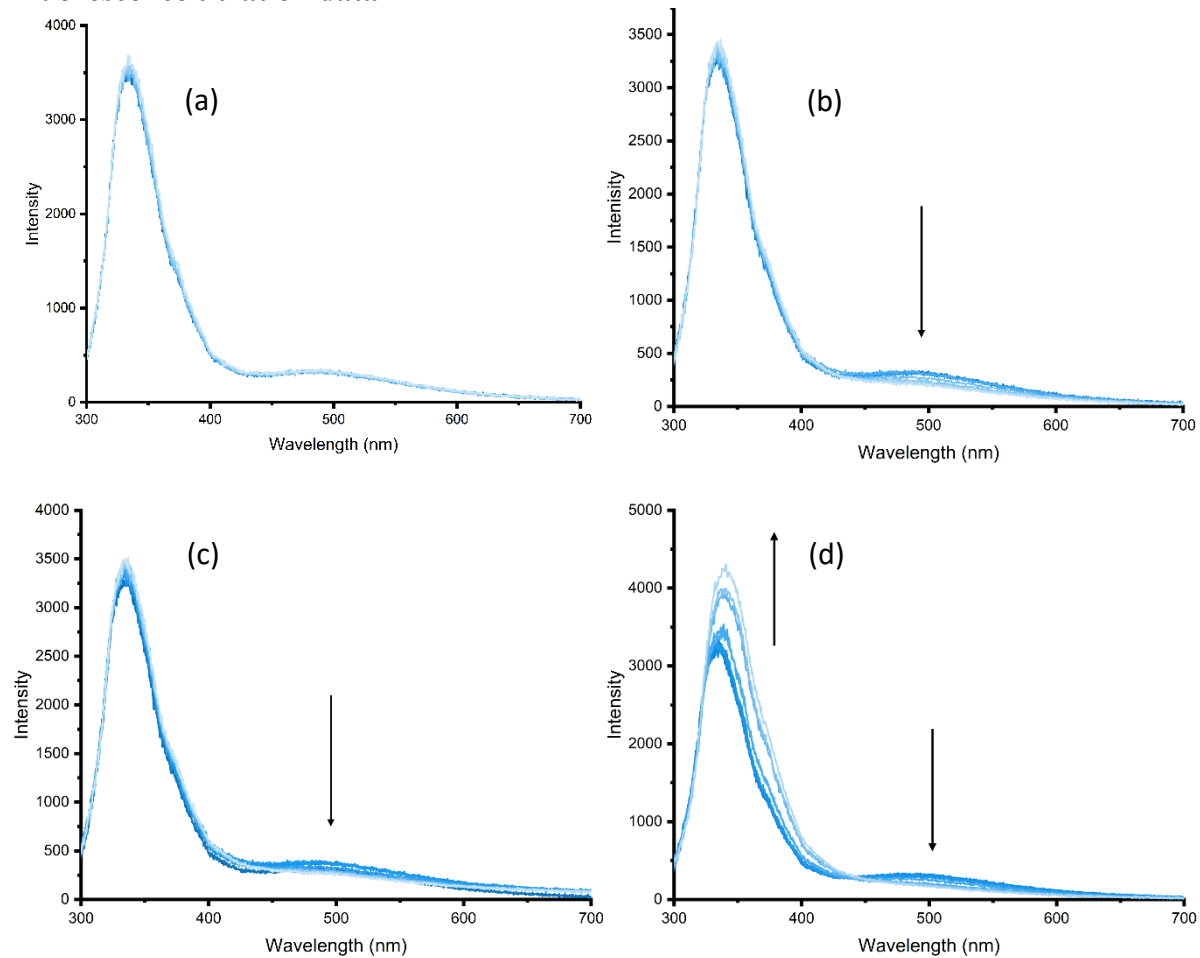

**Figure S11:** Fluorescence spectra of titration of **5** (20  $\mu$ M) with (a) TBACl, (b) TBAH<sub>2</sub>PO<sub>4</sub>, (c) TBAOAc and (d) TBA<sub>2</sub>SO<sub>4</sub>, 0 – 80 equivalents of anion in DMSO (1% water) at 298 K (excitation 280 nm).

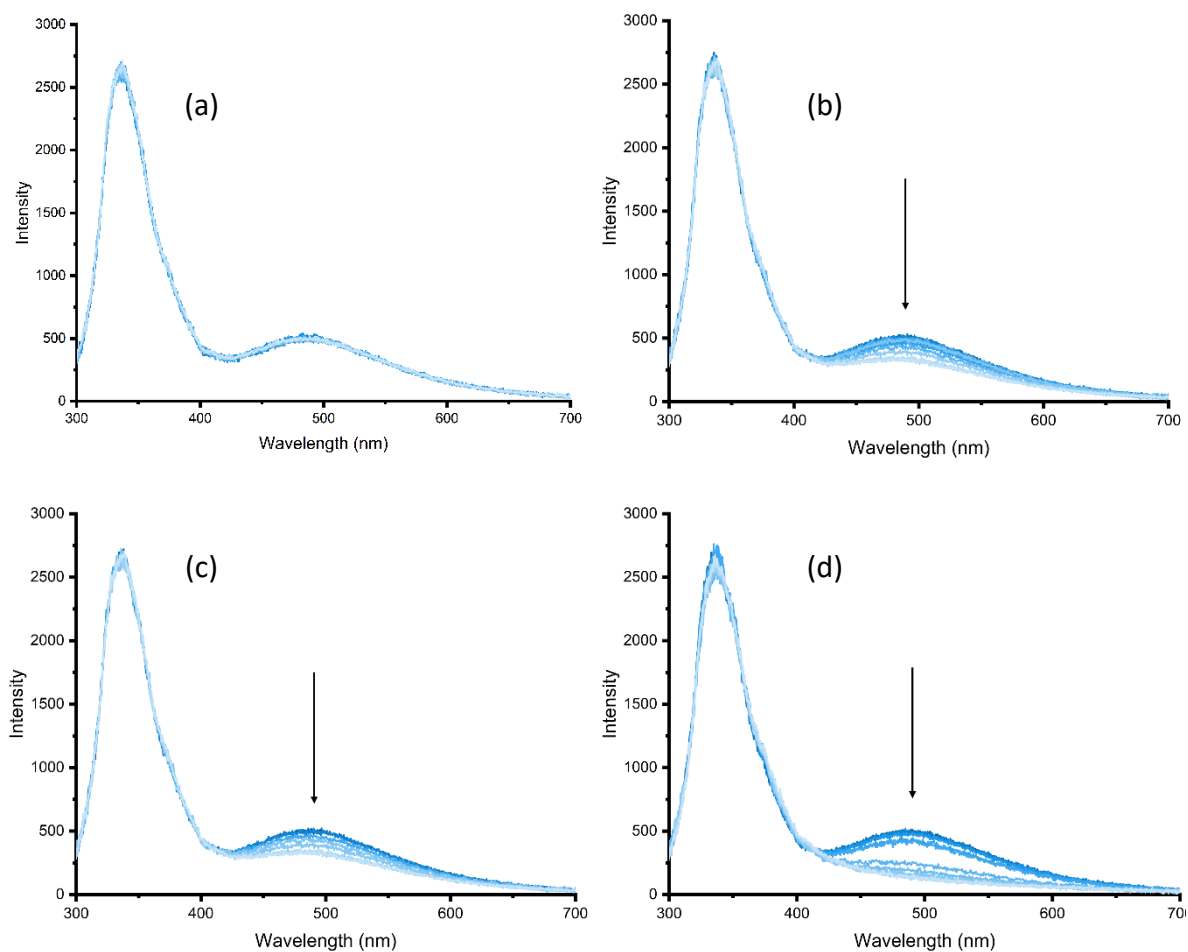

**Figure S12:** Fluorescence spectra of titration of **6** (20  $\mu\text{M}$ ) with (a) TBACl, (b) TBAH<sub>2</sub>PO<sub>4</sub>, (c) TBAOAc and (d) TBA<sub>2</sub>SO<sub>4</sub>, 0 – 80 equivalents of anion in DMSO (1% water) at 298 K (excitation 280 nm).

## References

1. Fernández-Moreira, V.; Alegre-Requena, J. V.; Herrera, R. P.; Marzo, I.; Gimeno, M. C., *RSC Advances* **2016**, *6* (17), 14171-14177.
2. Picci, G.; Milia, J.; Aragoni, M. C.; Arca, M.; Coles, S. J.; Garau, A.; Lippolis, V.; Montis, R.; Orton, J. B.; Caltagirone, C., *Molecules* **2021**, *26* (5).
3. Ni, X.; Li, X.; Wang, Z.; Cheng, J.-P., *Org. Lett.* **2014**, *16* (6), 1786-1789.
4. Zwicker, V. E.; Yuen, K. K. Y.; Smith, D. G.; Ho, J.; Qin, L.; Turner, P.; Jolliffe, K. A., *Chem. Eur. J.* **2018**, *24* (5), 1140-1150.
5. Busschaert, N.; Elmes, R. B. P.; Czech, D. D.; Wu, X.; Kirby, I. L.; Peck, E. M.; Hendzel, K. D.; Shaw, S. K.; Chan, B.; Smith, B. D.; Jolliffe, K. A.; Gale, P. A., *Chem. Sci.* **2014**, *5* (9), 3617-3626.
6. Ho, J.; Zwicker, V. E.; Yuen, K. K. Y.; Jolliffe, K. A., *J. Org. Chem.* **2017**, *82* (19), 10732-10736.
